# Supplementary material for: Four individually identified paired dopamine neurons signal taste punishment in larval Drosophila
Source: eLife. 2025 Jun 16;12:RP91387. doi: 10.7554/eLife.91387 (PMC12169853; doi:10.7554/eLife.91387)
Supplement: Figure 1—figure supplement 1—source data 1. [file elife-91387-fig1-figsupp1-data1.xlsx]

## Sheet: Figure 1 -FigSuppl 1
Figure 1 - Figure Supplement 1F
w1118 > UAS-ChR2XXL (w/ BL)			R58E02-Gal4 > UAS-ChR2XXL (w/o BL)			R58E02-Gal4 > UAS-ChR2XXL (w/ BL)				Statistical Analysis	(A) w1118 > UAS-ChR2XXL (w/ BL)	(B) R58E02-Gal4 > UAS-ChR2XXL (w/o BL)	(C) R58E02-Gal4 > UAS-ChR2XXL (w/ BL)
Pref1	Pref 2	PI	Pref1	Pref 2	PI	Pref1	Pref 2	PI
0	0.266667	0.133333	0.2	-0.333333	-0.0666667	0.6	0.666667	0.633333
-0.1	-0.2	-0.15	-0.366667	-0.166667	-0.266667	0.366667	0.9	0.633333		Number of values	15	15	15
-0.233333	0.6	0.183333	-0.2	0.3	0.05	0.366667	1	0.683333		Test for normal distribution: Shapiro-Wilk test
0.433333	0.133333	0.283333	0.3	0.2	0.25	0.6	0.71875	0.659375		W	0.9508	0.9663	0.8535
0.166667	0.166667	0.166667	0.1	-0.2	-0.05	0.633333	0.833333	0.733333		P value	0.5376	0.7997	0.0194
-0.4	0.0333333	-0.183333	0	0.2	0.1	0.6	0.733333	0.666667		Passed normality test (alpha=0.05)?	Yes	Yes	No
0.233333	-0.0666667	0.0833333	0.0333333	-0.233333	-0.1	1	0.9	0.95		P value summary	ns	ns	*
-0.3	-0.0333333	-0.166667	-0.166667	-0.2	-0.183333	0.9	0.9	0.9		Wilcoxon Signed Rank Test
-0.3	0.733333	0.216667	-0.133333	0.4	0.133333	0.833333	0.533333	0.683333		Theoretical median	0	0	0
-0.133333	0.233333	0.05	-0.0666667	-0.266667	-0.166667	0.7	0.8	0.75		Actual median	0.05	-0.05	0.72
-0.366667	0.333333	-0.0166667	0.2	0.266667	0.233333	0.966667	0.766667	0.866667		Sum of signed ranks (W)	28	-23	120
-0.3	0.366667	0.0333333	-0.0666667	0.166667	0.05	0.766667	0.666667	0.716667		Sum of positive ranks	74	48.5	120
0.366667	0.0333333	0.2	-0.166667	-0.1	-0.133333	0.766667	0.733333	0.75		Sum of negative ranks	-46	-71.5	0
-0.533333	-0.0333333	-0.283333	-0.366667	-0.233333	-0.3	0.866667	0.566667	0.716667		P value (two tailed)	0.445	0.5371	<0.0001
0	-0.166667	-0.0833333	0.233333	-0.1	0.0666667	0.433333	0.866667	0.65		Exact or estimate?	Exact	Exact	Exact
										P value summary	ns	ns	****
										Significant (alpha=0.05)?	No	No	Yes
										Kruskal-Wallis test
										P value	<0.0001
										Exact or approximate P value?	Approximate
										P value summary	****
										Do the medians vary signif. (P < 0.05)?	Yes
										Number of groups	3
										Kruskal-Wallis statistic	29.68
										Dunn's multiple comparison test	Mean rank diff.	Significant?	Summary	Adjusted P Value
										A vs B	2.667	No	ns	>0.9999
										A vs C	-21.17	Yes	****	<0.0001
										B vs C	-23.83	Yes	****	<0.0001
Figure 1 - Figure Supplement 1G
w1118 > UAS-ChR2XXL (w/ BL)			R58E02-Gal4 > UAS-ChR2XXL (w/o BL)			R58E02-Gal4 > UAS-ChR2XXL (w/ BL)				Statistical Analysis	(A) w1118 > UAS-ChR2XXL (w/ BL)	(B) R58E02-Gal4 > UAS-ChR2XXL (w/o BL)	(C) R58E02-Gal4 > UAS-ChR2XXL (w/ BL)
Pref1	Pref 2	PI	Pref1	Pref 2	PI	Pref1	Pref 2	PI
-0.0666667	0.4	0.166667	0.0333333	-0.266667	-0.116667	0.9	0.7	0.8
-0.0333333	-0.133333	-0.0833333	0.333333	-0.266667	0.0333333	0.833333	0.566667	0.7		Number of values	15	15	15
-0.1	-0.666667	-0.383333	0.4	0.0666667	0.233333	0.933333	0.633333	0.783333		Test for normal distribution: Shapiro-Wilk test
-0.3	-0.366667	-0.333333	0.133333	-0.0666667	0.0333333	0.633333	0.866667	0.75		W	0.9532	0.9449	0.9597
-0.3	-0.3	-0.3	0.566667	-0.266667	0.15	0.966667	0.633333	0.8		P value	0.576	0.4474	0.6869
0.133333	-0.0666667	0.0333333	0.466667	-0.366667	0.05	0.766667	0.566667	0.666667		Passed normality test (alpha=0.05)?	Yes	Yes	Yes
0.4	0.366667	0.383333	0.1	0.0333333	0.0666667	0.766667	0.7	0.733333		P value summary	ns	ns	ns
-0.1	-0.2	-0.15	-0.166667	0.433333	0.133333	0.533333	0.833333	0.683333		One sample t test
-0.466667	0.133333	-0.166667	-0.333333	0.0666667	-0.133333	0.633333	0.833333	0.733333		Theoretical mean	0	0	0
-0.233333	0.133333	-0.05	0.0666667	0.266667	0.166667	0.8	0.833333	0.816667		Actual mean	-0.09733	0.064	0.7607
-0.333333	-0.366667	-0.35	0.1	-0.0333333	0.0333333	0.833333	0.733333	0.783333		t, df	t=1.797, df=14	t=2.061, df=14	t=43.75, df=14
-0.466667	0.0333333	-0.216667	0.0333333	-0.233333	-0.1	0.7	0.633333	0.666667		P value (two tailed)	0.0939	0.0584	<0.0001
-0.166667	0.266667	0.05	0.333333	0	0.166667	0.966667	0.833333	0.9		P value summary	ns	ns	****
0	0.0333333	0.0166667	0.166667	-0.166667	0	0.833333	0.866667	0.85		Significant (alpha=0.05)?	No	No	Yes
0.266667	-0.433333	-0.0833333	0.0666667	0.433333	0.25	0.7	0.8	0.75
										Ordinary one-way ANOVA
										F	148.5
										P value	<0.0001
										P value summary	****
										Significant diff. among means (P < 0.05)?	Yes
										R squared	0.8761
										Tukey's multiple comparisons test	Mean Diff.	95.00% CI of diff.	Below threshold?	Summary	Adjusted P Value
										A vs B	-0.1613	-0.2899 to -0.03278	Yes	*	0.0108
										A vs C	-0.858	-0.9866 to -0.7294	Yes	****	<0.0001
										B vs C	-0.6967	-0.8252 to -0.5681	Yes	****	<0.0001
Figure 1 - Figure Supplement 1H
R58E02-Gal4>UAS-GtACR2 w/o ATR			R58E02-Gal4>UAS-GtACR2 w/ ATR							Statistical Analysis	(A) R58E02-Gal4>UAS-GtACR2 w/o ATR	(B) R58E02-Gal4>UAS-GtACR2 w/ ATR
Pref1	Pref 2	PI	Pref1	Pref 2	PI
-0.764706	-0.484848	-0.624777	-0.514286	-0.179487	-0.346886
-0.645161	-0.0344828	-0.339822	-0.352941	-0.357143	-0.355042					Number of values	15	15
-0.535714	-0.62963	-0.582672	-0.8125	-0.193548	-0.503024					Test for normal distribution: Shapiro-Wilk test
-0.233333	-0.259259	-0.246296	-0.6	-0.296296	-0.448148					W	0.9496	0.9667
-0.342857	-0.121951	-0.232404	-0.35	-0.487179	-0.41859					P value	0.5175	0.8067
-0.435897	-0.459459	-0.447678	-0.388889	-0.294118	-0.341503					Passed normality test (alpha=0.05)?	Yes	Yes
-0.769231	-0.230769	-0.5	-0.529412	0	-0.264706					P value summary	ns	ns
-0.666667	-0.517241	-0.591954	-0.21875	-0.354839	-0.286794					One sample t test
-0.653846	-0.25	-0.451923	-0.121212	-0.387097	-0.254154					Theoretical mean	0	0
-0.533333	-0.393939	-0.463636	-0.8	-0.354839	-0.577419					Actual mean	-0.434	-0.3973
-0.357143	-0.264706	-0.310924	-0.6875	-0.297297	-0.492399					t, df	t=14.21, df=14	t=16.27, df=14
-0.666667	-0.235294	-0.45098	-0.571429	-0.333333	-0.452381					P value (two tailed)	<0.0001	<0.0001
-0.555556	-0.323529	-0.439542	-0.40625	-0.277778	-0.342014					P value summary	****	****
-0.457143	-0.233333	-0.345238	-0.685714	-0.15625	-0.420982					Significant (alpha=0.05)?	Yes	Yes
-0.666667	-0.322581	-0.494624	-0.653846	-0.275862	-0.464854
										Unpaired t-test
										P value	0.3565
										P value summary	ns
										Significantly different (P < 0.05)?	No
										One- or two-tailed P value?	Two-tailed
										t, df	t=0.9375, df=28
										Mean of column A	-0.434
										Mean of column B	-0.3973
										Difference between means (B - A) ± SEM	0.03667 ± 0.03911
										95% confidence interval	-0.04345 to 0.1168
										R squared (eta squared)	0.03043
Figure 1 - Figure Supplement 1I
R58E02-Gal4>UAS-GtACR2 w/o ATR			R58E02-Gal4>UAS-GtACR2 w/ ATR							Statistical Analysis	(A) R58E02-Gal4>UAS-GtACR2 w/o ATR	(B) R58E02-Gal4>UAS-GtACR2 w/ ATR
Pref1	Pref 2	PI	Pref1	Pref 2	PI
-0.129032	-0.53125	-0.330141	-0.923077	-0.473684	-0.698381
-0.314286	-0.108108	-0.211197	-0.138889	-0.538462	-0.338675					Number of values	15	15
-0.432432	-0.282051	-0.357242	-0.380952	-0.465116	-0.423034					Test for normal distribution: Shapiro-Wilk test
-0.733333	-0.0909091	-0.412121	-0.433333	-0.0571429	-0.245238					W	0.968	0.9036
-0.852941	-0.413793	-0.633367	-0.487179	-0.142857	-0.315018					P value	0.8278	0.1081
-0.444444	-0.333333	-0.388889	-0.742857	0.0285714	-0.357143					Passed normality test (alpha=0.05)?	Yes	Yes
-0.322581	-0.242424	-0.282502	-0.575758	-0.114286	-0.345022					P value summary	ns	ns
-0.657143	-0.5625	-0.609821	-0.605263	-0.166667	-0.385965					One sample t test
-0.555556	-0.333333	-0.444444	-0.774194	-0.225806	-0.5					Theoretical mean	0	0
-0.466667	-0.481481	-0.474074	-0.30303	-0.212121	-0.257576					Actual mean	-0.3787	-0.374
-0.294118	-0.457143	-0.37563	-0.37037	-0.322581	-0.346476					t, df	t=11.12, df=14	t=11.37, df=14
-0.0571429	-0.25	-0.153571	-0.321429	-0.214286	-0.267857					P value (two tailed)	<0.0001	<0.0001
-0.366667	-0.181818	-0.274242	-0.484848	-0.233333	-0.359091					P value summary	****	****
-0.535714	-0.35	-0.442857	-0.676471	-0.40625	-0.54136					Significant (alpha=0.05)?	Yes	Yes
-0.393939	-0.222222	-0.308081	-0.368421	-0.0217391	-0.19508
										Unpaired t-test
										P value	0.9222
										P value summary	ns
										Significantly different (P < 0.05)?	No
										One- or two-tailed P value?	Two-tailed
										t, df	t=0.09859, df=28
										Mean of column A	-0.3787
										Mean of column B	-0.374
										Difference between means (B - A) ± SEM	0.004667 ± 0.04734
										95% confidence interval	-0.09230 to 0.1016
										R squared (eta squared)	0.000347
