# Supplementary material for: Four individually identified paired dopamine neurons signal taste punishment in larval Drosophila
Source: eLife. 2025 Jun 16;12:RP91387. doi: 10.7554/eLife.91387 (PMC12169853; doi:10.7554/eLife.91387)
Supplement: Figure 1—source data 1. [file elife-91387-fig1-data1.xlsx]

## Sheet: Figure 1
Figure 1F
w1118 > UAS-ChR2XXL (w/ BL)			TH-Gal4 > UAS-ChR2XXL (w/o BL)			TH-Gal4 > UAS-ChR2XXL (w/ BL)				Statistical Analysis	(A) w1118 > UAS-ChR2XXL (w/ BL)	(B) TH-Gal4 > UAS-ChR2XXL (w/o BL)	(C) TH-Gal4 > UAS-ChR2XXL (w/ BL)
Pref1	Pref 2	PI	Pref1	Pref 2	PI	Pref1	Pref 2	PI
0	0.266667	0.133333	-0.266667	0.2	-0.0333333	-0.766667	-0.4	-0.583333
-0.1	-0.2	-0.15	-0.333333	0.333333	0	-0.766667	-0.0666667	-0.416667		Number of values	15	15	15
-0.233333	0.6	0.183333	-0.4	-0.0333333	-0.216667	-0.8	-0.566667	-0.683333		Test for normal distribution: Shapiro-Wilk test
0.433333	0.133333	0.283333	-0.433333	-0.2	-0.316667	-0.9	-0.366667	-0.633333		W	0.9508	0.9508	0.9861
0.166667	0.166667	0.166667	-0.233333	-0.1	-0.166667	-0.566667	-0.5	-0.533333		P value	0.5376	0.5376	0.9952
-0.4	0.0333333	-0.183333	-0.1	0.5	0.2	-0.333333	-0.6	-0.466667		Passed normality test (alpha=0.05)?	Yes	Yes	Yes
0.233333	-0.0666667	0.0833333	-0.166667	0.133333	-0.0166667	-0.666667	-0.466667	-0.566667		P value summary	ns	ns	ns
-0.3	-0.0333333	-0.166667	-0.3	0.333333	0.0166667	-0.766667	-0.8	-0.783333		One sample t test
-0.3	0.733333	0.216667	-0.366667	-0.166667	-0.266667	-0.133333	-0.3	-0.216667		Theoretical mean	0	0	0
-0.133333	0.233333	0.05	0.5	0.0333333	0.266667	-0.533333	-0.333333	-0.433333		Actual mean	0.03067	-0.03933	-0.5227
-0.366667	0.333333	-0.0166667	-0.333333	0.3	-0.0166667	-0.466667	-0.2	-0.333333		t, df	t=0.6943, df=14	t=0.9631, df=14	t=13.93, df=14
-0.3	0.366667	0.0333333	-0.366667	0.366667	0	-0.666667	-0.533333	-0.6		P value (two tailed)	0.4989	0.3519	<0.0001
0.366667	0.0333333	0.2	-0.3	0.4	0.05	-0.566667	-0.766667	-0.666667		P value summary	ns	ns	****
-0.533333	-0.0333333	-0.283333	-0.433333	0.333333	-0.05	-0.7	-0.166667	-0.433333		Significant (alpha=0.05)?	No	No	Yes
0	-0.166667	-0.0833333	-0.5	0.433333	-0.0333333	-0.4	-0.6	-0.5
										Ordinary one-way ANOVA
										F	54.19
										P value	<0.0001
										P value summary	****
										Significant diff. among means (P < 0.05)?	Yes
										R squared	0.7207
										Tukey's multiple comparisons test	Mean Diff.	95.00% CI of diff.	Significant?	Summary	Adjusted P Value
										A vs B	0.07	-0.07063 to 0.2106	No	ns	0.4544
										A vs C	0.5533	0.4127 to 0.6940	Yes	****	<0.0001
										B vs C	0.4833	0.3427 to 0.6240	Yes	****	<0.0001
Figure 1G
w1118 > UAS-ChR2XXL (w/ BL)			TH-Gal4 > UAS-ChR2XXL (w/o BL)			TH-Gal4 > UAS-ChR2XXL (w/ BL)				Statistical Analysis	(A) w1118 > UAS-ChR2XXL (w/ BL)	(B) TH-Gal4 > UAS-ChR2XXL (w/o BL)	(C) TH-Gal4 > UAS-ChR2XXL (w/ BL)
Pref1	Pref 2	PI	Pref1	Pref 2	PI	Pref1	Pref 2	PI
-0.0666667	0.4	0.166667	0.3	-0.0666667	0.116667	-0.833333	-0.866667	-0.85
-0.0333333	-0.133333	-0.0833333	-0.133333	0.0666667	-0.0333333	-0.8	-0.7	-0.75		Number of values	15	15	15
-0.1	-0.666667	-0.383333	-0.166667	-0.266667	-0.216667	-0.9	-0.766667	-0.833333		Test for normal distribution: Shapiro-Wilk test
-0.3	-0.366667	-0.333333	0.366667	-0.2	0.0833333	-0.533333	-0.633333	-0.583333		W	0.9532	0.8428	0.9291
-0.3	-0.3	-0.3	-0.233333	-0.166667	-0.2	-0.866667	-0.333333	-0.6		P value	0.576	0.0138	0.2649
0.133333	-0.0666667	0.0333333	0.266667	-0.0333333	0.116667	-0.833333	-0.866667	-0.85		Passed normality test (alpha=0.05)?	Yes	No	Yes
0.4	0.366667	0.383333	-0.0333333	0.0666667	0.0166667	-0.633333	-0.866667	-0.75		P value summary	ns	*	ns
-0.1	-0.2	-0.15	-0.0666667	0.2	0.0666667	-0.766667	-0.433333	-0.6		Wilcoxon Signed Rank Test
-0.466667	0.133333	-0.166667	-0.366667	0.366667	0	-0.7	-0.533333	-0.616667		Theoretical median	0	0	0
-0.233333	0.133333	-0.05	0.466667	-0.333333	0.0666667	-0.466667	-0.6	-0.533333		Actual median	-0.08	0.07	-0.62
-0.333333	-0.366667	-0.35	0.1	0.166667	0.133333	-0.666667	-0.7	-0.683333		Sum of signed ranks (W)	-61	2	-120
-0.466667	0.0333333	-0.216667	-0.633333	0.366667	-0.133333	-0.566667	-0.366667	-0.466667		Sum of positive ranks	29.5	53.5	0
-0.166667	0.266667	0.05	0.166667	-0.0333333	0.0666667	-0.8	-0.3	-0.55		Sum of negative ranks	-90.5	-51.5	-120
0	0.0333333	0.0166667	0.166667	-0.0333333	0.0666667	-0.866667	-0.6	-0.733333		P value (two tailed)	0.0858	0.9661	<0.0001
0.266667	-0.433333	-0.0833333	-0.4	-0.133333	-0.266667	-0.333333	-0.766667	-0.55		Exact or estimate?	Exact	Exact	Exact
										P value summary	ns	ns	****
										Significant (alpha=0.05)?	No	No	Yes
										Kruskal-Wallis test
										P value	<0.0001
										Exact or approximate P value?	Approximate
										P value summary	****
										Do the medians vary signif. (P < 0.05)?	Yes
										Number of groups	3
										Kruskal-Wallis statistic	30.78
										Dunn's multiple comparisons test	Mean rank diff.	Significant?	Summary	Adjusted P Value
										A vs B	-5.667	No	ns	0.7113
										A vs C	19.67	Yes	***	0.0001
										B vs C	25.33	Yes	****	<0.0001
Figure 1H
TH-Gal4>UAS-GtACR2 w/o ATR			TH-Gal4>UAS-GtACR2 w/ ATR							Statistical Analysis	(A) TH-Gal4>UAS-GtACR2 w/o ATR	(B) TH-Gal4>UAS-GtACR2 w/ ATR
Pref1	Pref 2	PI	Pref1	Pref 2	PI
-0.228571	-0.47619	-0.352381	-0.463415	-0.333333	-0.398374
-0.153846	-0.560976	-0.357411	0.27027	-0.5	-0.114865					Number of values	15	15
-0.232558	-0.5625	-0.397529	-0.0714286	-0.216216	-0.143822					Test for normal distribution: Shapiro-Wilk test
-0.147059	-0.657143	-0.402101	0	-0.189189	-0.0945946					W	0.929	0.9245
-0.179487	-0.179487	-0.179487	0	-0.314286	-0.157143					P value	0.2633	0.2253
-0.266667	-0.552632	-0.409649	-0.125	-0.52381	-0.324405					Passed normality test (alpha=0.05)?	Yes	Yes
-0.4	-0.605263	-0.502632	0.2	-0.5	-0.15					P value summary	ns	ns
-0.285714	-0.53125	-0.408482	-0.2	-0.333333	-0.266667					One sample t test
-0.487805	-0.35	-0.418902	-0.097561	-0.323529	-0.210545					Theoretical mean	0	0
-0.0645161	-0.233333	-0.148925	-0.027027	-0.266667	-0.146847					Actual mean	-0.35	-0.2047
-0.233333	-0.459459	-0.346396	0.0294118	-0.153846	-0.0622172					t, df	t=11.88, df=14	t=6.776, df=14
-0.416667	-0.666667	-0.541667	-0.105263	0	-0.0526316					P value (two tailed)	<0.0001	<0.0001
-0.25	-0.3125	-0.28125	-0.441176	-0.352941	-0.397059					P value summary	****	****
-0.307692	-0.351351	-0.329522	-0.206897	-0.481481	-0.344189					Significant (alpha=0.05)?	Yes	Yes
-0.0666667	-0.277778	-0.172222	0.0263158	-0.46875	-0.221217
										Unpaired t-test
										P value	0.0018
										P value summary	**
										Significantly different (P < 0.05)?	Yes
										One- or two-tailed P value?	Two-tailed
										t, df	t=3.444, df=28
										Mean of column A	-0.35
										Mean of column B	-0.2047
										Difference between means (B - A) ± SEM	0.1453 ± 0.04220
										95% confidence interval	0.05889 to 0.2318
										R squared (eta squared)	0.2976
Figure 1I
TH-Gal4>UAS-GtACR2 w/o ATR			TH-Gal4>UAS-GtACR2 w/ ATR							Statistical Analysis	(A) TH-Gal4>UAS-GtACR2 w/o ATR	(B) TH-Gal4>UAS-GtACR2 w/ ATR
Pref1	Pref 2	PI	Pref1	Pref 2	PI
-0.166667	-0.741935	-0.454301	0.0277778	-0.243243	-0.107733
-0.606061	-0.142857	-0.374459	-0.351351	-0.23913	-0.295241					Number of values	15	15
-0.297297	-0.525	-0.411149	-0.025	-0.102564	-0.0637821					Test for normal distribution: Shapiro-Wilk test
-0.388889	-0.0333333	-0.211111	0.025	-0.375	-0.175					W	0.9509	0.935
-0.2	-0.228571	-0.214286	-0.0555556	-0.125	-0.0902778					P value	0.5383	0.3233
-0.588235	-0.473684	-0.53096	0.0833333	-0.461538	-0.189103					Passed normality test (alpha=0.05)?	Yes	Yes
-0.210526	-0.5	-0.355263	-0.333333	-0.447368	-0.390351					P value summary	ns	ns
-0.390244	-0.641026	-0.515635	-0.102564	-0.125	-0.113782					One sample t test
-0.5	-0.75	-0.625	-0.612903	-0.322581	-0.467742					Theoretical mean	0	0
-0.666667	-0.366667	-0.516667	-0.40625	0.03125	-0.1875					Actual mean	-0.43	-0.2187
-0.4	-0.482759	-0.441379	-0.466667	-0.0857143	-0.27619					t, df	t=11.96, df=14	t=7.040, df=14
-0.21875	-0.676471	-0.44761	-0.289474	-0.35	-0.319737					P value (two tailed)	<0.0001	<0.0001
-0.351351	-0.5	-0.425676	-0.0227273	-0.275862	-0.149295					P value summary	****	****
-0.177778	-0.305556	-0.241667	-0.297297	-0.317073	-0.307185					Significant (alpha=0.05)?	Yes	Yes
-0.611111	-0.75	-0.680556	0.0294118	-0.297297	-0.133943
										Unpaired t-test
										P value	0.0001
										P value summary	***
										Significantly different (P < 0.05)?	Yes
										One- or two-tailed P value?	Two-tailed
										t, df	t=4.448, df=28
										Mean of column A	-0.43
										Mean of column B	-0.2187
										Difference between means (B - A) ± SEM	0.2113 ± 0.04751
										95% confidence interval	0.1140 to 0.3086
										R squared (eta squared)	0.4141
