# Supplementary material for: Four individually identified paired dopamine neurons signal taste punishment in larval Drosophila
Source: eLife. 2025 Jun 16;12:RP91387. doi: 10.7554/eLife.91387 (PMC12169853; doi:10.7554/eLife.91387)
Supplement: Figure 2—figure supplement 1—source data 1. [file elife-91387-fig2-figsupp1-data1.xlsx]

## Sheet: Figure 2-FigSuppl 1
Figure 2 - Figure Supplement 1D
w1118 > UAS-hid,rpr			MB143B > w1118			MB143B > UAS-hid,rpr				Statistical Analysis	(A) w1118 > UAS-hid,rpr	(B) MB143B > w1118	(C) MB143B > UAS-hid,rpr
Pref1	Pref 2	PI	Pref1	Pref 2	PI	Pref1	Pref 2	PI
-0.333333	0.0571429	-0.138095	-0.482759	-0.3	-0.391379	-0.733333	-0.357143	-0.545238
-0.647059	-0.411765	-0.529412	-0.4	-0.28125	-0.340625	-0.625	0.125	-0.25		Number of values	20	15	15
-0.571429	0.176471	-0.197479	-0.4375	-0.424242	-0.430871	-0.241379	-0.4375	-0.33944		Test for normal distribution: Shapiro-Wilk test
-0.34375	0.222222	-0.0607639	-0.448276	-0.16129	-0.304783	-0.727273	0.290323	-0.218475		W	0.9488	0.8982	0.8723
-0.285714	-0.0555556	-0.170635	-0.566667	0.148148	-0.209259	-0.387097	-0.206897	-0.296997		P value	0.3494	0.0892	0.0365
-0.535714	-0.28125	-0.408482	-0.5	-0.485714	-0.492857	-0.466667	0	-0.233333		Passed normality test (alpha=0.05)?	Yes	Yes	No
-0.514286	0.28125	-0.116518	-0.65625	-0.324324	-0.490287	-0.6875	-0.233333	-0.460417		P value summary	ns	ns	*
-0.375	-0.103448	-0.239224	-0.757576	0.153846	-0.301865	-0.4375	-0.151515	-0.294508		Wilcoxon Signed Rank Test
-0.823529	-0.125	-0.474265	-0.594595	-0.162162	-0.378378	-0.53125	0.0571429	-0.237054		Theoretical median	0	0	0
-0.837838	0.121212	-0.358313	-0.633333	-0.344828	-0.48908	-0.133333	-0.193548	-0.163441		Actual median	-0.245	-0.39	-0.27
-0.714286	0.257143	-0.228571	-0.787879	-0.25	-0.518939	-0.59375	-0.580645	-0.587198		Sum of signed ranks (W)	-210	-120	-120
-0.615385	0.459459	-0.0779626	-0.540541	-0.147059	-0.3438	-0.586207	-0.4375	-0.511853		Sum of positive ranks	0	0	0
-0.472222	-0.0263158	-0.249269	-0.151515	-0.275862	-0.213689	-0.193548	-0.125	-0.159274		Sum of negative ranks	-210	-120	-120
-0.771429	0.0857143	-0.342857	-0.636364	-0.393939	-0.515152	-0.517241	0	-0.258621		P value (two tailed)	<0.0001	<0.0001	<0.0001
-0.625	0.45	-0.0875	-0.756757	-0.285714	-0.521236	-0.567568	0.027027	-0.27027		Exact or estimate?	Exact	Exact	Exact
-0.459459	-0.0512821	-0.255371								P value summary	****	****	****
-0.75	-0.025	-0.3875								Significant (alpha=0.05)?	Yes	Yes	Yes
-0.486486	0.194444	-0.146021								Kruskal-Wallis test
-0.846154	-0.0689655	-0.45756								P value	0.0522
-0.606061	-0.619048	-0.612554								Exact or approximate P value?	Approximate
										P value summary	ns
										Do the medians vary signif. (P < 0.05)?	No
										Number of groups	3
										Kruskal-Wallis statistic	5.906
										Dunn's multiple comparison test	Mean rank diff.	Significant?	Summary	Adjusted P Value
										A vs B	12.06	Yes	*	0.0461
										A vs C	4.358	No	ns	>0.9999
										B vs C	-7.7	No	ns	0.4432
Figure 2 - Figure Supplement 1E
w1118 > UAS-hid,rpr			MB145B > w1118			MB145B > UAS-hid,rpr				Statistical Analysis	(A) w1118 > UAS-hid,rpr	(B) MB145B> w1118	(C) MB145B > UAS-hid,rpr
Pref1	Pref 2	PI	Pref1	Pref 2	PI	Pref1	Pref 2	PI
-0.333333	0.0571429	-0.138095	-0.419355	0.242424	-0.0884653	-0.580645	-0.25	-0.415323
-0.647059	-0.411765	-0.529412	-0.655172	0.361111	-0.147031	-0.606061	-0.205882	-0.405971		Number of values	20	20	20
-0.571429	0.176471	-0.197479	-0.181818	0.114286	-0.0337662	-0.457143	-0.176471	-0.316807		Test for normal distribution: Shapiro-Wilk test
-0.34375	0.222222	-0.0607639	-0.21875	0.0909091	-0.0639205	-0.428571	-0.0294118	-0.228992		W	0.9488	0.9481	0.9695
-0.285714	-0.0555556	-0.170635	-0.542857	-0.125	-0.333929	-0.410256	-0.3125	-0.361378		P value	0.3494	0.3391	0.7437
-0.535714	-0.28125	-0.408482	-0.424242	-0.290323	-0.357283	-0.72973	0.0625	-0.333615		Passed normality test (alpha=0.05)?	Yes	Yes	Yes
-0.514286	0.28125	-0.116518	-0.666667	-0.166667	-0.416667	-0.882353	0.323529	-0.279412		P value summary	ns	ns	ns
-0.375	-0.103448	-0.239224	-0.642857	0.15625	-0.243304	-0.612903	-0.0322581	-0.322581		One sample t test
-0.823529	-0.125	-0.474265	0	0.0857143	0.0428571	-0.515152	0.1875	-0.163826		Theoretical mean	0	0	0
-0.837838	0.121212	-0.358313	-0.09375	-0.0909091	-0.0923295	0.0571429	-0.290323	-0.11659		Actual mean	-0.278	-0.196	-0.328
-0.714286	0.257143	-0.228571	-0.631579	-0.181818	-0.406699	-0.290323	-0.0857143	-0.188018		t, df	t=7.747, df=19	t=5.164, df=19	t=11.51, df=19
-0.615385	0.459459	-0.0779626	-0.184211	0.189189	0.00248933	-0.666667	0.0666667	-0.3		P value (two tailed)	<0.0001	<0.0001	<0.0001
-0.472222	-0.0263158	-0.249269	0.03125	0	0.015625	-0.75	-0.290323	-0.520161		P value summary	****	****	****
-0.771429	0.0857143	-0.342857	-0.230769	-0.0645161	-0.147643	-0.4	0.2	-0.1		Significant (alpha=0.05)?	Yes	Yes	Yes
-0.625	0.45	-0.0875	0	-0.16129	-0.0806452	-0.606061	-0.44	-0.52303
-0.459459	-0.0512821	-0.255371	-0.35	-0.0540541	-0.202027	-0.575758	-0.515152	-0.545455		Ordinary one-way ANOVA
-0.75	-0.025	-0.3875	-0.535714	0	-0.267857	-0.407407	-0.424242	-0.415825		F	3.764
-0.486486	0.194444	-0.146021	-0.645161	-0.483871	-0.564516	-0.421053	-0.34375	-0.382401		P value	0.0292
-0.846154	-0.0689655	-0.45756	-0.71875	-0.0625	-0.390625	-0.5	-0.190476	-0.345238		P value summary	*
-0.606061	-0.619048	-0.612554	-0.4	0.107143	-0.146429	-0.393939	-0.171429	-0.282684		Significant diff. among means (P < 0.05)?	Yes
										R squared	0.1166
										Tukey's multiple comparisons test	Mean Diff.	95.00% CI of diff.	Below threshold?	Summary	Adjusted P Value
										A vs B	-0.082	-0.1989 to 0.03491	No	ns	0.2186
										A vs C	0.05	-0.06691 to 0.1669	No	ns	0.5617
										B vs C	0.132	0.01509 to 0.2489	Yes	*	0.0233
Figure 2 - Figure Supplement1F
w1118 > UAS-hid,rpr			MB143B > w1118			MB143B > UAS-hid,rpr				Statistical Analysis	(A) w1118 > UAS-hid,rpr	(B) MB143B > w1118	(C) MB143B > UAS-hid,rpr
Pref1	Pref 2	PI	Pref1	Pref 2	PI	Pref1	Pref 2	PI
-0.162162	-0.212121	-0.187142	-0.486486	0	-0.243243	-0.28125	0.0666667	-0.107292
-0.583333	0.0967742	-0.24328	-0.722222	0.0967742	-0.312724	-0.393939	-0.129032	-0.261486		Number of values	25	15	20
-0.708333	-0.192308	-0.45	-0.586207	-0.25	-0.418103	-0.4375	0.272727	-0.0823864		Test for normal distribution: Shapiro-Wilk test
-0.351351	-0.333333	-0.34	-0.5625	-0.354839	-0.458669	-0.612903	-0.666667	-0.639785		W	0.9377	0.9793	0.9407
-0.684211	0	-0.34	-0.181818	-0.264706	-0.223262	-0.333333	-0.193548	-0.263441		P value	0.1308	0.9643	0.2472
-0.457143	-0.235294	-0.346218	-0.428571	0.384615	-0.021978	-0.655172	-0.454545	-0.554859		Passed normality test (alpha=0.05)?	Yes	Yes	Yes
-0.457143	0.181818	-0.137662	-0.545455	0.0571429	-0.244156	-0.485714	-0.459459	-0.472587		P value summary	ns	ns	ns
-0.2	-0.277778	-0.238889	-0.5	-0.0555556	-0.277778	-0.555556	0.0555556	-0.25		One sample t test
-0.558824	-0.206897	-0.38286	-0.235294	-0.162162	-0.198728	-0.633333	-0.09375	-0.363542		Theoretical mean	0	0	0
-0.0571429	-0.147059	-0.102101	-0.5	0.117647	-0.191176	-0.5	-0.793103	-0.646552		Actual mean	-0.2092	-0.276	-0.315
-0.4	-0.212121	-0.306061	-0.777778	-0.266667	-0.522222	-0.666667	0.030303	-0.318182		t, df	t=9.006, df=24	t=8.216, df=14	t=8.416, df=19
-0.382353	0.189189	-0.0965819	-0.4	-0.290323	-0.345161	-0.405405	-0.341463	-0.373434		P value (two tailed)	<0.0001	<0.0001	<0.0001
-0.4	0.228571	-0.0857143	-0.387097	0.185185	-0.100956	-0.225	-0.315789	-0.270395		P value summary	****	****	****
-0.285714	-0.121212	-0.203463	-0.40625	-0.172414	-0.289332	-0.560976	0.425	-0.0679878		Significant (alpha=0.05)?	Yes	Yes	Yes
-0.351351	0.025	-0.163176	-0.71875	0.111111	-0.303819	-0.151515	-0.326087	-0.238801
-0.586207	-0.0333333	-0.30977				-0.372093	-0.488372	-0.430233		Ordinary one-way ANOVA
-0.764706	0.0645161	-0.350095				-0.914286	0.210526	-0.35188		F	3.358
-0.514286	0.175	-0.169643				-0.333333	-0.0967742	-0.215054		P value	0.0418
-0.516129	0.28125	-0.11744				-0.5	0	-0.25		P value summary	*
-0.580645	0.129032	-0.225806				-0.48	0.172414	-0.153793		Significant diff. among means (P < 0.05)?	Yes
-0.190476	0.102564	-0.043956								R squared	0.1054
-0.236842	0.102564	-0.067139								Tukey's multiple comparisons test	Mean Diff.	95.00% CI of diff.	Below threshold?	Summary	Adjusted P Value
-0.514286	0.346154	-0.0840659								A vs B	0.0668	-0.04203 to 0.1756	No	ns	0.3095
-0.392857	0.0967742	-0.148041								A vs C	0.1058	0.005829 to 0.2058	Yes	*	0.0357
-0.454545	0.30303	-0.0757576								B vs C	0.039	-0.07482 to 0.1528	No	ns	0.6895
Figure 2 - Figure Supplement 1G
w1118 > UAS-hid,rpr			MB145B > w1118			MB145B > UAS-hid,rpr				Statistical Analysis	(A) w1118 > UAS-hid,rpr	(B) MB145B > w1118	(C) MB145B > UAS-hid,rpr
Pref1	Pref 2	PI	Pref1	Pref 2	PI	Pref1	Pref 2	PI
-0.162162	-0.212121	-0.187142	-0.485714	0.0833333	-0.20119	0.0909091	0	0.0454545
-0.583333	0.0967742	-0.24328	-0.230769	0.512821	0.141026	-0.382353	-0.178571	-0.280462		Number of values	25	20	20
-0.708333	-0.192308	-0.45	-0.589744	0.15	-0.219872	-0.393939	-0.25641	-0.325175		Test for normal distribution: Shapiro-Wilk test
-0.351351	-0.333333	-0.34	-0.657143	0.0857143	-0.285714	-0.272727	-0.129032	-0.20088		W	0.9377	0.9623	0.9198
-0.684211	0	-0.34	-0.2	0.393939	0.0969697	-0.4	-0.027027	-0.213514		P value	0.1308	0.5907	0.0982
-0.457143	-0.235294	-0.346218	-0.464286	-0.037037	-0.250661	-0.0571429	0.135135	0.0389961		Passed normality test (alpha=0.05)?	Yes	Yes	Yes
-0.457143	0.181818	-0.137662	-0.571429	0.0444444	-0.263492	-0.619048	-0.285714	-0.452381		P value summary	ns	ns	ns
-0.2	-0.277778	-0.238889	-0.181818	0.384615	0.101399	-0.484848	-0.205128	-0.344988		One sample t test
-0.558824	-0.206897	-0.38286	-0.560976	0.375	-0.0929878	-0.368421	-0.138889	-0.253655		Theoretical mean	0	0	0
-0.0571429	-0.147059	-0.102101	-0.594595	0.0952381	-0.249678	-0.512195	0.0294118	-0.241392		Actual mean	-0.2092	-0.1755	-0.1785
-0.4	-0.212121	-0.306061	-0.384615	0.307692	-0.0384615	-0.487179	0.047619	-0.21978		t, df	t=9.006, df=24	t=4.174, df=19	t=5.082, df=19
-0.382353	0.189189	-0.0965819	-0.131579	0.189189	0.0288051	-0.6	0.121212	-0.239394		P value (two tailed)	<0.0001	0.0005	<0.0001
-0.4	0.228571	-0.0857143	-0.666667	0.0322581	-0.317204	-0.470588	0.555556	0.0424837		P value summary	****	***	****
-0.285714	-0.121212	-0.203463	-0.666667	-0.0909091	-0.378788	-0.666667	-0.125	-0.395833		Significant (alpha=0.05)?	Yes	Yes	Yes
-0.351351	0.025	-0.163176	-0.717949	-0.310345	-0.514147	-0.121212	0.28125	0.0800189
-0.586207	-0.0333333	-0.30977	-0.416667	0.289474	-0.0635965	-0.371429	0.114286	-0.128571		Ordinary one-way ANOVA
-0.764706	0.0645161	-0.350095	-0.578947	0.275	-0.151974	-0.416667	0.0540541	-0.181306		F	0.3396
-0.514286	0.175	-0.169643	-0.416667	0.257143	-0.0797619	-0.0571429	0.15625	0.0495536		P value	0.7134
-0.516129	0.28125	-0.11744	-0.3	-0.243243	-0.271622	-0.243902	-0.05	-0.146951		P value summary	ns
-0.580645	0.129032	-0.225806	-0.702703	-0.3125	-0.507601	-0.368421	-0.0555556	-0.211988		Significant diff. among means (P < 0.05)?	No
-0.190476	0.102564	-0.043956								R squared	0.01084
-0.236842	0.102564	-0.067139								Tukey's multiple comparisons test	Mean Diff.	95.00% CI of diff.	Below threshold?	Summary	Adjusted P Value
-0.514286	0.346154	-0.0840659								A vs B	-0.0337	-0.1444 to 0.07701	No	ns	0.7461
-0.392857	0.0967742	-0.148041								A vs C	-0.0307	-0.1414 to 0.08001	No	ns	0.7841
-0.454545	0.30303	-0.0757576								B vs C	0.003	-0.1137 to 0.1197	No	ns	0.9979
