# Supplementary material for: Four individually identified paired dopamine neurons signal taste punishment in larval Drosophila
Source: eLife. 2025 Jun 16;12:RP91387. doi: 10.7554/eLife.91387 (PMC12169853; doi:10.7554/eLife.91387)
Supplement: Figure 3—source data 1. [file elife-91387-fig3-data1.xlsx]

## Sheet: Figure 3
Figure 3A
Calcium imaging raw traces
																																				T-test
SS02160													500 mM Fructose																						Chance	500 mM Fructose				100 mM NaCl				1 M NaCl
time (sec.)		0	1	2	3	4	5	6	7	8	9	10	11	12	13	14	15	16	17	18	19	20	21	22	23	24										before	Max response	Normalized response		before	Max response	Normalized response		before	Max response	Normalized response
Larva	1	-0.0204681	-0.0150979	-0.0241404	-0.0164177	-0.00654431	0.0102489	0.0134252	-0.00128156	0.0424315	0.0508842	0.0650622	0.0622899	0.0183899	0.102426	0.0670738	0.0694499	0.0791929	0.0346308	0.0280725	0.00842693	-0.0114795	-0.0126356	0.0207335	-0.0260334	-0.0234603									0	0.00891837	0.102426	0.0935079		0.00195678	0.163413	0.161456		0.00891837	0.102426	0.0935079
	2	-0.139268	-0.176065	-0.235435	-0.232155	-0.240698	-0.209702	-0.201633	-0.220614	-0.197239	-0.243254	-0.135907	-0.0286675	-0.0443635	-0.00782474	-0.110638	-0.176368	-0.16732	-0.195094	-0.222207	-0.228557	-0.235858	-0.167	-0.199583	-0.238426	-0.220014									0	-0.202906	-0.0286675	0.174239		-0.00466945	0.110577	0.115246		-0.202906	-0.00782474	0.195082
	3	-0.121494	-0.188257	-0.0704224	-0.0549652	-0.178425	-0.0738749	-0.11145	-0.118544	-0.221554	-0.108425	-0.089571	-0.0097387	-0.0588062	-0.159283	-0.127936	-0.113699	-0.110022	-0.182419	-0.143077	-0.162328	-0.135467	-0.0643377	-0.0585852	-0.122716	-0.169222									0	-0.121544	-0.0097387	0.111805		-0.00831914	0.12387	0.132189		-0.121544	-0.0097387	0.111805
	4	-0.0985418	-0.065139	-0.0659083	-0.0796426	-0.0239387	-0.0446393	-0.0601356	-0.0584771	-0.108024	-0.0300719	-0.0707095	-0.0825713	-0.0937795	-0.0852153	-0.0765649	-0.0566271	-0.0548989	-0.0545518	-0.0714716	-0.100175	-0.039208	-0.0305826	-0.092284	-0.0548206	-0.0239999									0	-0.0641116	-0.0548989	0.00921268		-0.0133982	0.018165	0.0315632		-0.0641116	-0.0548989	0.00921268
	5	-0.0288302	-0.0485969	-0.0865224	-0.0699111	-0.057217	-0.00488115	-0.054304	-0.019902	-0.0315937	0.00261866	0.0413665	0.0190834	-0.0298338	-0.0917171	-0.100859	-0.0335991	0.00931884	0.0343517	0.0155144	0.012325	0.0461709	-0.0191949	0.00640504	-0.0239868	-0.0346562									0	-0.0325248	0.0190834	0.0516083		0.00572491	0.0496494	0.0439245		-0.0325248	0.0190834	0.0516083
																																			average			0.0880746				0.0968757				0.0922431
MEAN		0	0.00527948	-0.0116312	-0.00948568	-0.00361841	-0.0143646	0.0224303	0.00418042	0.00323641	-0.0161957	0.0213502	0.0490482	0.0790792	0.0453214	0.0386772	0.0172153	0.0248313	0.038254	0.0143834	0.00836635	-0.00706161	0.0118317	0.0282497	0.0223374	-0.0061965
STDEV		0.0541431	0.0784726	0.0810158	0.0827026	0.102819	0.0876181	0.079886	0.0886829	0.110917	0.114978	0.0869428	0.0540028	0.0411205	0.0999021	0.078728	0.0920153	0.0969438	0.112169	0.106146	0.105604	0.111276	0.0637061	0.0885245	0.0904661	0.0934545									p-values			0.0134552				0.00504889				0.0183205
SEM		0.0242135	0.035094	0.0362314	0.0369857	0.0459819	0.039184	0.0357261	0.0396602	0.0496035	0.0514197	0.038882	0.0241508	0.0183897	0.0446776	0.0352082	0.0411505	0.0433546	0.0501637	0.0474697	0.0472274	0.0497643	0.0284903	0.0395894	0.0404577	0.0417941
		0	1	2	3	4	5	6	7	8	9	10	11	12	13	14	15	16	17	18	19	20	21	22	23	24
errorbar+		0.048427	0.070188	0.0724628	0.0739714	0.0919638	0.078368	0.0714522	0.0793204	0.099207	0.102839	0.077764	0.0483016	0.0367793	0.0893552	0.0704165	0.082301	0.0867092	0.100327	0.0949394	0.0944549	0.0995286	0.0569805	0.0791787	0.0809154	0.0835883
errorbar-		-0.0242135	-0.0298145	-0.0478626	-0.0464714	-0.0496003	-0.0535486	-0.0132958	-0.0354798	-0.0463671	-0.0676154	-0.0175317	0.0248974	0.0606895	0.000643799	0.00346893	-0.0239352	-0.0185233	-0.0119097	-0.0330863	-0.0388611	-0.0568259	-0.0166586	-0.0113396	-0.0181203	-0.0479906
mean		0	0.00527948	-0.0116312	-0.00948568	-0.00361841	-0.0143646	0.0224303	0.00418042	0.00323641	-0.0161957	0.0213502	0.0490482	0.0790792	0.0453214	0.0386772	0.0172153	0.0248313	0.038254	0.0143834	0.00836635	-0.00706161	0.0118317	0.0282497	0.0223374	-0.0061965
													100 mM NaCl
time (sec.)		0	1	2	3	4	5	6	7	8	9	10	11	12	13	14	15	16	17	18	19	20	21	22	23	24
Larva	1	-0.0248771	0.0131567	0.00666138	0.0028808	0.0138279	-0.016654	-0.00155482	0.00412618	0.00596062	0.00834738	0.00964953	0.0300211	0.115262	0.163413	0.121491	0.100721	0.0630552	0.0693629	0.0673735	-0.0148287	-0.0252303	-0.0085109	-0.018145	-0.0343551	0.00281537
	2	-0.0132583	0.16315	0.112973	0.041331	-0.0725765	-0.0581575	-0.0798721	-0.0613541	0.00444824	-0.0215481	-0.0664999	0.110577	-0.0370379	0.0142023	-0.101064	-0.206136	-0.105259	-0.152576	-0.129911	-0.0278544	0.0081652	-0.000716062	-0.0794069	-0.193259	-0.216883
	3	-0.0396733	-0.00135104	0.0580358	0.0916353	0.078447	-0.0468493	0.0321445	-0.0721668	-0.127555	-0.0792817	0.0151036	0.0662291	0.12387	0.0933356	-0.00191866	-0.0676772	-0.142391	0.0381219	0.0676347	0.0491892	-0.0180386	0.0299352	-0.0245999	-0.116575	-0.0797942
	4	0.00786331	-0.0143411	-0.0212262	0.053261	-0.0254477	0.00130398	-0.00708684	0.013985	-0.0281322	-0.0714895	-0.0560697	-0.0619365	-0.0556241	-0.0148211	-0.0255658	-0.000241076	0.018165	-0.00919996	0.00922362	-0.00818471	0.0255447	-0.0159475	-0.0147546	-0.034688	-0.053718
	5	0.0523264	0.00589687	0.0252147	-0.0255467	-0.00436459	0.00578484	-0.025208	-0.038047	-0.0170499	-0.00277799	0.0867454	0.0496494	0.0142867	0.00455318	0.0319706	0.0446545	0.0701362	0.0876171	0.0666064	-0.0423358	-0.0181273	-0.0377134	-0.0267151	-0.0346354	-0.02248
MEAN		0	0.0174762	0.0543023	0.0573318	0.0537123	0.0189772	-0.0019144	0.00468456	-0.00969134	-0.0114656	-0.01235	0.0187858	0.059908	0.0531513	0.0731365	0.0259827	-0.00473589	0.00174134	0.0276653	0.0371854	0.0121971	0.0154627	0.0144095	-0.0117243	-0.0617026
STDEV		0.0357296	0.073294	0.0516281	0.0454216	0.0553594	0.0285671	0.0411398	0.0384797	0.0550853	0.0399279	0.0620232	0.0637315	0.0838607	0.0746094	0.0814392	0.118215	0.0983935	0.0962849	0.0854434	0.0349542	0.0215433	0.02464	0.026537	0.0712801	0.0857545
SEM		0.0159788	0.0327781	0.0230888	0.0203132	0.0247575	0.0127756	0.0183983	0.0172087	0.0246349	0.0178563	0.0277376	0.0285016	0.0375036	0.0333663	0.0364207	0.0528675	0.0440029	0.0430599	0.0382114	0.015632	0.00963446	0.0110193	0.0118677	0.0318774	0.0383506
		0	1	2	3	4	5	6	7	8	9	10	11	12	13	14	15	16	17	18	19	20	21	22	23	24
errorbar+		0.0319575	0.0655561	0.0461776	0.0406263	0.049515	0.0255512	0.0367966	0.0344173	0.0492698	0.0357126	0.0554753	0.0570032	0.0750073	0.0667326	0.0728415	0.105735	0.0880058	0.0861198	0.0764229	0.031264	0.0192689	0.0220387	0.0237354	0.0637549	0.0767011
errorbar-		-0.0159788	-0.0153019	0.0312135	0.0370187	0.0289548	0.00620162	-0.0203127	-0.0125241	-0.0343262	-0.0293219	-0.0400876	-0.00971582	0.0224043	0.0197849	0.0367158	-0.0268848	-0.0487388	-0.0413186	-0.0105462	0.0215534	0.00256267	0.00444342	0.00254175	-0.0436017	-0.100053
mean		0	0.0174762	0.0543023	0.0573318	0.0537123	0.0189772	-0.0019144	0.00468456	-0.00969134	-0.0114656	-0.01235	0.0187858	0.059908	0.0531513	0.0731365	0.0259827	-0.00473589	0.00174134	0.0276653	0.0371854	0.0121971	0.0154627	0.0144095	-0.0117243	-0.0617026
													1 M NaCl
time (sec.)		0	1	2	3	4	5	6	7	8	9	10	11	12	13	14	15	16	17	18	19	20	21	22	23	24
Larva	1	-0.0204681	-0.0150979	-0.0241404	-0.0164177	-0.00654431	0.0102489	0.0134252	-0.00128156	0.0424315	0.0508842	0.0650622	0.0622899	0.0183899	0.102426	0.0670738	0.0694499	0.0791929	0.0346308	0.0280725	0.00842693	-0.0114795	-0.0126356	0.0207335	-0.0260334	-0.0234603
	2	-0.139268	-0.176065	-0.235435	-0.232155	-0.240698	-0.209702	-0.201633	-0.220614	-0.197239	-0.243254	-0.135907	-0.0286675	-0.0443635	-0.00782474	-0.110638	-0.176368	-0.16732	-0.195094	-0.222207	-0.228557	-0.235858	-0.167	-0.199583	-0.238426	-0.220014
	3	-0.121494	-0.188257	-0.0704224	-0.0549652	-0.178425	-0.0738749	-0.11145	-0.118544	-0.221554	-0.108425	-0.089571	-0.0097387	-0.0588062	-0.159283	-0.127936	-0.113699	-0.110022	-0.182419	-0.143077	-0.162328	-0.135467	-0.0643377	-0.0585852	-0.122716	-0.169222
	4	-0.0985418	-0.065139	-0.0659083	-0.0796426	-0.0239387	-0.0446393	-0.0601356	-0.0584771	-0.108024	-0.0300719	-0.0707095	-0.0825713	-0.0937795	-0.0852153	-0.0765649	-0.0566271	-0.0548989	-0.0545518	-0.0714716	-0.100175	-0.039208	-0.0305826	-0.092284	-0.0548206	-0.0239999
	5	-0.0288302	-0.0485969	-0.0865224	-0.0699111	-0.057217	-0.00488115	-0.054304	-0.019902	-0.0315937	0.00261866	0.0413665	0.0190834	-0.0298338	-0.0917171	-0.100859	-0.0335991	0.00931884	0.0343517	0.0155144	0.012325	0.0461709	-0.0191949	0.00640504	-0.0239868	-0.0346562
MEAN		0	-0.0186889	-0.0145478	-0.0165865	-0.00492318	-0.0162342	0.0107853	0.00725039	0.0124224	-0.0177928	-0.00977337	0.0275783	0.109961	0.0957165	0.0665933	0.0513091	0.0229712	0.0220024	0.0368066	0.0335505	0.0253973	0.0688782	0.0353542	-0.00144619	-0.0135792
STDEV		0.0541431	0.0784726	0.0810158	0.0827026	0.102819	0.0876181	0.079886	0.0886829	0.110917	0.114978	0.0869428	0.0540028	0.0411205	0.0999021	0.078728	0.0920153	0.0969438	0.112169	0.106146	0.105604	0.111276	0.0637061	0.0885245	0.0904661	0.0934545
SEM		0.0242135	0.035094	0.0362314	0.0369857	0.0459819	0.039184	0.0357261	0.0396602	0.0496035	0.0514197	0.038882	0.0241508	0.0183897	0.0446776	0.0352082	0.0411505	0.0433546	0.0501637	0.0474697	0.0472274	0.0497643	0.0284903	0.0395894	0.0404577	0.0417941
		0	1	2	3	4	5	6	7	8	9	10	11	12	13	14	15	16	17	18	19	20	21	22	23	24
errorbar+		0.048427	0.070188	0.0724628	0.0739714	0.0919638	0.078368	0.0714522	0.0793204	0.099207	0.102839	0.077764	0.0483016	0.0367793	0.0893552	0.0704165	0.082301	0.0867092	0.100327	0.0949394	0.0944549	0.0995286	0.0569805	0.0791787	0.0809154	0.0835883
errorbar-		-0.0242135	-0.053783	-0.0507791	-0.0535723	-0.0509051	-0.0554182	-0.0249408	-0.0324098	-0.037181	-0.0692124	-0.0486554	0.00342756	0.0915709	0.051039	0.0313851	0.0101586	-0.0203834	-0.0281613	-0.0106631	-0.0136769	-0.024367	0.0403879	-0.00423515	-0.0419039	-0.0553734
mean		0	-0.0186889	-0.0145478	-0.0165865	-0.00492318	-0.0162342	0.0107853	0.00725039	0.0124224	-0.0177928	-0.00977337	0.0275783	0.109961	0.0957165	0.0665933	0.0513091	0.0229712	0.0220024	0.0368066	0.0335505	0.0253973	0.0688782	0.0353542	-0.00144619	-0.0135792
Figure 3B
Calcium imaging raw traces
																																				T-test
MB328B													500 mM Fructose																						Chance	500mM Fructose				100mM NaCl				1M NaCl
time (sec.)		0	1	2	3	4	5	6	7	8	9	10	11	12	13	14	15	16	17	18	19	20	21	22	23	24	25	26	27	28	29	30				before	Max response	Normalized response		before	Max response	Normalized response		before	Max response	Normalized response
Larva	1	-0.0234273	-0.00934843	-0.00403819	-0.0022354	0.00430996	0.00232169	0.00143999	0.023021	0.00465358	-0.00130194	0.00655457	0.0274022	0.0534829	0.0511561	-0.0151412	-0.0405119	-0.0274649	0.00746297	0.0234365	0.0194119	0.0226214	0.0361845	0.0169533	0.0373418	0.0255841	-0.0157163	-0.0248926	0.00430392	-0.0235314	-0.0149146	0.004935			0	0.000177229	0.0534829	0.0533056		0.00189787	0.0740747	0.0721768		-0.013136	0.199078	0.212214
	2	-0.0226987	-0.0151326	-0.00617537	0.00698128	0.00534958	-0.0189373	0.00985565	0.0301776	-0.034435	-0.0198821	0.0210614	0.00299861	-0.0170862	-0.0324988	-0.0403077	-0.0370413	0.0132862	0.013026	-0.000715552	-0.0119973	-0.00231504	0.0323737	0.032706	0.040331	0.0911105	0.0501732	-0.000998817	0.00644175	0.0152056	0.024967	0.0389053			0	-0.00398505	-0.0403077	-0.0363226		0.0344941	-0.0727412	-0.107235		-0.0293755	0.316513	0.345889
	3	0.054833	-0.019401	-0.000617231	0.000534928	-0.0118623	-0.00744895	-0.014607	-0.00537652	-0.00458084	-0.00806089	-0.00658151	0.0220889	-0.00722803	-0.031429	-0.0082925	0.0118542	-0.00251702	-0.0134856	0.00308977	0.0218773	0.0106603	0.0121207	0.0828411	0.0111646	0.00608277	0.00827978	0.00801539	0.000496081	-0.00794555	-0.0102887	0.00590862			0	-0.00210621	-0.031429	-0.0293228		0.0296056	0.0485295	0.0189239		0.0209058	0.122207	0.101301
	4	0.0261169	0.03277	0.0346753	0.0258374	-0.0282871	-0.0388992	-0.0292852	-0.0181111	-0.00690794	-0.00610535	-0.00613985	-0.0136211	-0.0240689	-0.000872342	0.0295774	0.0420047	0.0457224	0.0202945	-0.00467139	-0.02116	-0.0204485	0.00936371	0.0100446	-0.0178942	-0.0138805	0.0101154	0.00678393	-0.0112812	-0.0323785	-0.0488432	-0.034771			0	-0.00130329	0.0457224	0.0470257		-0.035779	0.0142877	0.0500666		-0.0179311	0.110172	0.128103
	5	0.0308013	0.00256472	-0.0132997	-0.011849	0.00169798	0.00249907	0.000732134	0.00138678	0.00391637	0.0257338	0.0432231	0.0336797	0.0304076	0.0549716	0.0583348	0.0244336	0.0183287	0.0228587	0.0353334	0.0518536	0.0481683	0.0374481	0.0109559	-0.00460688	-0.00337544	-0.00337231	-0.00891436	-0.0040243	0.0257556	0.027417	0.0176898			0	0.00794606	0.0583348	0.0503887		0.0204536	0.0748642	0.0544106		0.0383363	0.124129	0.0857931
																																			average			0.0170149				0.0176685				0.17466
MEAN		0.013125	-0.00170944	0.00210897	0.00385383	-0.00575838	-0.0120929	-0.00637289	0.00621954	-0.00747078	-0.00192329	0.0116236	0.0145097	0.00710147	0.0082655	0.00483416	0.000147855	0.00947108	0.0100313	0.0112946	0.0119971	0.0117373	0.0254981	0.0307002	0.0132673	0.0211043	0.00989596	-0.00400129	-0.000812753	-0.00457886	-0.0043325	0.00653353
STDEV		0.0347858	0.020968	0.0187873	0.0140333	0.0143628	0.0173759	0.0155536	0.020038	0.0159092	0.016904	0.0209778	0.0194615	0.0333781	0.0428426	0.0389989	0.0371318	0.0269961	0.0144783	0.017261	0.0292244	0.0258855	0.013634	0.0305293	0.0255293	0.0417426	0.0247838	0.0135122	0.00707856	0.0247738	0.0316036	0.0268394			p-values			0.428454				0.600213				0.00663711
SEM		0.0155567	0.00937717	0.00840191	0.00627587	0.00642323	0.00777076	0.0069558	0.00896126	0.0071148	0.0075597	0.00938154	0.00870344	0.0149271	0.0191598	0.0174408	0.0166058	0.012073	0.0064749	0.00771935	0.0130695	0.0115763	0.00609733	0.0136531	0.011417	0.0186679	0.0110837	0.00604285	0.00316563	0.0110792	0.0141336	0.0120029
		0	1	2	3	4	5	6	7	8	9	10	11	12	13	14	15	16	17	18	19	20	21	22	23	24	25	26	27	28	29	30
errorbar+		0.0311134	0.0187543	0.0168038	0.0125517	0.0128465	0.0155415	0.0139116	0.0179225	0.0142296	0.0151194	0.0187631	0.0174069	0.0298542	0.0383196	0.0348817	0.0332117	0.024146	0.0129498	0.0154387	0.0261391	0.0231527	0.0121947	0.0273063	0.0228341	0.0373357	0.0221673	0.0120857	0.00633125	0.0221583	0.0282671	0.0240059
errorbar-		-0.00243164	-0.0110866	-0.00629294	-0.00242204	-0.0121816	-0.0198637	-0.0133287	-0.00274172	-0.0145856	-0.00948299	0.00224202	0.00580621	-0.00782565	-0.0108943	-0.0126067	-0.016458	-0.00260194	0.00355642	0.00357521	-0.00107244	0.000160937	0.0194008	0.017047	0.00185022	0.00243641	-0.0011877	-0.0100441	-0.00397838	-0.015658	-0.0184661	-0.0054694
mean		0.013125	-0.00170944	0.00210897	0.00385383	-0.00575838	-0.0120929	-0.00637289	0.00621954	-0.00747078	-0.00192329	0.0116236	0.0145097	0.00710147	0.0082655	0.00483416	0.000147855	0.00947108	0.0100313	0.0112946	0.0119971	0.0117373	0.0254981	0.0307002	0.0132673	0.0211043	0.00989596	-0.00400129	-0.000812753	-0.00457886	-0.0043325	0.00653353
													100 mM NaCl
time (sec.)		0	1	2	3	4	5	6	7	8	9	10	11	12	13	14	15	16	17	18	19	20	21	22	23	24	25	26	27	28	29	30
Larva	1	-0.0149146	0.004935	0.0103665	-0.000691838	-0.00138025	0.00408596	-0.015675	0.000249647	0.00739385	-0.0115116	0.0380189	0.0680888	0.0740747	0.0477252	0.0221776	-0.000512886	-0.0125038	0.0118108	0.0573806	0.0700037	0.0165988	-0.0363175	-0.00979032	-0.00113056	-0.0014427	-0.00874458	-0.00173031	-0.00353516	-0.0296526	-0.0353656	-0.0299962
	2	0.024967	0.0389053	0.0541603	0.069303	0.0900106	0.0988038	0.035893	-0.00654054	-0.0257431	-0.00306083	0.00273679	-0.0170054	-0.00636454	0.00172896	-0.0317404	-0.0588003	-0.0727412	-0.0372271	-0.0315044	-0.0567952	-0.0530168	-0.0273757	-0.0236666	-0.0316856	-0.0355379	-0.0274893	-0.0351098	-0.0452116	-0.0448015	-0.0419467	-0.0311476
	3	-0.0102887	0.00590862	0.0362448	0.0411108	0.0293999	0.053685	0.0215965	0.0211814	0.024789	0.0385036	0.0635303	0.0485295	0.0210989	0.0217024	0.012469	-0.00173603	0.0112835	0.0347436	0.0265664	0.0403667	0.0342249	0.0166373	0.00756683	0.0128494	0.0308715	0.0305061	0.015943	0.00246035	0.00470702	0.0162153	0.0458228
	4	-0.0488432	-0.034771	-0.0196164	-0.0482899	-0.0694028	-0.0346017	-0.0164075	-0.0267	-0.0325647	-0.034337	-0.0280344	0.00280021	0.0073489	0.00477989	0.00415512	0.00395924	0.00418406	0.00499542	0.00968501	0.0142877	0.00347628	-0.0107211	-0.0108027	-0.008455	-0.0088549	-0.0115812	-0.00969538	-0.00473729	-0.0127663	-0.0304903	-0.0408285
	5	0.027417	0.0176898	0.00786169	0.000592815	0.022706	0.0442319	0.0226126	0.0100838	0.0134302	0.0209337	0.0374296	0.0326346	0.00599384	0.00121536	0.000138042	0.032239	0.0748642	0.0580579	0.0404847	0.0349715	0.0358081	0.0295762	0.045095	0.0374262	0.0291262	0.0436127	0.052741	0.0492678	0.0405931	0.0182199	0.0175627
MEAN		-0.0043325	0.00653353	0.0178034	0.012405	0.0142667	0.033241	0.00960391	-0.000345156	-0.00253895	0.00210558	0.0227362	0.0270095	0.0204304	0.0154304	0.00143988	-0.0049702	0.00101734	0.0144761	0.0205225	0.0205669	0.00741824	-0.00564016	0.00168045	0.00180089	0.00283245	0.00526075	0.0044297	-0.000351175	-0.00838406	-0.0146735	-0.00771735
STDEV		0.0316036	0.0268394	0.0283562	0.0448785	0.0576255	0.0507196	0.024082	0.0180656	0.0252015	0.0283703	0.0356765	0.0342989	0.0315264	0.0199093	0.0203819	0.0331371	0.0528959	0.0356383	0.0339771	0.0476126	0.0363208	0.0281772	0.0266897	0.025624	0.0278599	0.0302513	0.0326626	0.0335849	0.0330451	0.0294035	0.0375742
SEM		0.0141336	0.0120029	0.0126813	0.0200703	0.0257709	0.0226825	0.0107698	0.00807919	0.0112705	0.0126876	0.015955	0.0153389	0.0140991	0.00890371	0.00911508	0.0148194	0.0236558	0.0159379	0.015195	0.021293	0.0162432	0.0126012	0.011936	0.0114594	0.0124593	0.0135288	0.0146071	0.0150196	0.0147782	0.0131496	0.0168037
		0	1	2	3	4	5	6	7	8	9	10	11	12	13	14	15	16	17	18	19	20	21	22	23	24	25	26	27	28	29	30
errorbar+		0.0282671	0.0240059	0.0253626	0.0401406	0.0515418	0.045365	0.0215396	0.0161584	0.0225409	0.0253752	0.03191	0.0306779	0.0281981	0.0178074	0.0182302	0.0296387	0.0473116	0.0318759	0.0303901	0.042586	0.0324863	0.0252025	0.023872	0.0229188	0.0249187	0.0270576	0.0292143	0.0300393	0.0295564	0.0262993	0.0336074
errorbar-		-0.0184661	-0.0054694	0.0051221	-0.00766532	-0.0115042	0.0105585	-0.0011659	-0.00842435	-0.0138094	-0.010582	0.00678124	0.0116706	0.00633131	0.00652666	-0.00767519	-0.0197896	-0.0226384	-0.0014618	0.00532742	-0.000726137	-0.00882491	-0.0182414	-0.0102555	-0.00965851	-0.00962688	-0.00826805	-0.0101774	-0.0153708	-0.0231623	-0.0278231	-0.0245211
mean		-0.0043325	0.00653353	0.0178034	0.012405	0.0142667	0.033241	0.00960391	-0.000345156	-0.00253895	0.00210558	0.0227362	0.0270095	0.0204304	0.0154304	0.00143988	-0.0049702	0.00101734	0.0144761	0.0205225	0.0205669	0.00741824	-0.00564016	0.00168045	0.00180089	0.00283245	0.00526075	0.0044297	-0.000351175	-0.00838406	-0.0146735	-0.00771735
													1 M NaCl
time (sec.)		0	1	2	3	4	5	6	7	8	9	10	11	12	13	14	15	16	17	18	19	20	21	22	23	24	25	25	25	25	25	25
Larva	1	-0.00874458	-0.00173031	-0.00353516	-0.0296526	-0.0353656	-0.0299962	-0.0164084	-0.00674504	-0.00501269	-0.00439748	-0.00290798	0.0426173	0.149264	0.199078	0.185663	0.112571	0.0596167	0.0409182	0.0394667	0.0271461	0.00737291	-0.00585406	0.0211696	0.0137603	0.00507408	0.0147817	0.0343836	0.0348864	0.0217715	-0.00680793	-0.0127606
	2	-0.0274893	-0.0351098	-0.0452116	-0.0448015	-0.0419467	-0.0311476	-0.00275073	0.00407396	-0.0244237	-0.0362277	-0.0380954	0.0108565	0.11576	0.224718	0.215194	0.201893	0.190167	0.263911	0.316513	0.212144	0.178313	0.160416	0.0914331	0.03327	-0.000881059	0.0209038	0.0316537	-0.0069869	-0.00804735	-0.00400349	-0.00526657
	3	0.0305061	0.015943	0.00246035	0.00470702	0.0162153	0.0458228	0.0435895	0.0348408	0.0291035	0.00107751	0.0056984	0.0331827	0.0655721	0.0989698	0.122207	0.0367466	-0.0207387	-0.0111338	0.0207591	0.0340879	0.00665027	-0.0366138	-0.00115186	-0.0140012	-0.0150634	0.0194988	0.0258885	0.000254024	0.00373123	0.0209511	0.0259056
	4	-0.0115812	-0.00969538	-0.00473729	-0.0127663	-0.0304903	-0.0408285	-0.0461121	-0.0264394	-0.00785289	-0.00576061	-0.000977944	0.0343979	0.0721457	0.107244	0.110172	0.0805038	0.0575882	0.0396516	0.0161636	-0.00603735	0.0156978	0.0540302	0.0428228	0.0174369	-0.0159297	-0.0343405	-0.0221349	-0.0158315	-0.0316361	-0.0383984	-0.0377099
	5	0.0436127	0.052741	0.0492678	0.0405931	0.0182199	0.0175627	0.0346725	0.0464266	0.0539935	0.041143	0.0234667	0.0342528	0.0568074	0.100699	0.121371	0.124129	0.123459	0.116007	0.106895	0.0940911	0.0635902	0.0307711	0.0329194	0.035302	0.0155617	0.00663372	0.0563626	0.0733531	0.0569443	0.0419647	0.0297706
MEAN		0.00526075	0.0044297	-0.000351175	-0.00838406	-0.0146735	-0.00771735	0.00259814	0.0104314	0.00916154	-0.00083307	-0.00256326	0.0310614	0.0919098	0.146142	0.150921	0.111169	0.0820184	0.0898707	0.0999596	0.0722864	0.0543249	0.0405499	0.0374386	0.0171536	-0.00224765	0.0054955	0.0252307	0.017135	0.00855272	0.00274121	-1.219e-05
STDEV		0.0302513	0.0326626	0.0335849	0.0330451	0.0294035	0.0375742	0.0369851	0.0299432	0.0317252	0.0276379	0.022422	0.0119121	0.0392899	0.060786	0.0466266	0.0609913	0.0791694	0.107347	0.12639	0.0861207	0.0731922	0.0754202	0.0343465	0.0198199	0.0134545	0.0229562	0.0288884	0.0368416	0.0332807	0.0304106	0.0281514
SEM		0.0135288	0.0146071	0.0150196	0.0147782	0.0131496	0.0168037	0.0165403	0.013391	0.0141879	0.01236	0.0100274	0.00532726	0.017571	0.0271843	0.0208521	0.0272761	0.0354056	0.0480069	0.0565232	0.0385143	0.0327326	0.0337289	0.0153602	0.00886375	0.00601702	0.0102663	0.0129193	0.0164761	0.0148836	0.0136	0.0125897
		0	1	2	3	4	5	6	7	8	9	10	11	12	13	14	15	16	17	18	19	20	21	22	23	24	25	26	27	28	29	30
errorbar+		0.0270576	0.0292143	0.0300393	0.0295564	0.0262993	0.0336074	0.0330805	0.026782	0.0283759	0.0247201	0.0200548	0.0106545	0.035142	0.0543686	0.0417041	0.0545523	0.0708113	0.0960138	0.113046	0.0770287	0.0654651	0.0674579	0.0307204	0.0177275	0.012034	0.0205326	0.0258386	0.0329521	0.0297672	0.0272001	0.0251793
errorbar-		-0.00826805	-0.0101774	-0.0153708	-0.0231623	-0.0278231	-0.0245211	-0.0139421	-0.00295962	-0.0050264	-0.0131931	-0.0125907	0.0257342	0.0743388	0.118957	0.130069	0.0838925	0.0466128	0.0418639	0.0434364	0.0337721	0.0215924	0.00682098	0.0220784	0.00828987	-0.00826467	-0.00477081	0.0123114	0.000658968	-0.00633088	-0.0108588	-0.0126019
mean		0.00526075	0.0044297	-0.000351175	-0.00838406	-0.0146735	-0.00771735	0.00259814	0.0104314	0.00916154	-0.00083307	-0.00256326	0.0310614	0.0919098	0.146142	0.150921	0.111169	0.0820184	0.0898707	0.0999596	0.0722864	0.0543249	0.0405499	0.0374386	0.0171536	-0.00224765	0.0054955	0.0252307	0.017135	0.00855272	0.00274121	-1.219e-05
Figure 3C
Calcium imaging raw traces
																																				T-test
SS02180													500 mM Fructose																						Chance	500mM Fructose				100mM NaCl				1M NaCl
time (sec.)		0	1	2	3	4	5	6	7	8	9	10	11	12	13	14	15	16	17	18	19	20	21	22	23	24	25	26	27	28	29	30				before	Max response	Normalized response		before	Max response	Normalized response		before	Max response	Normalized response
Larva	1	0.155439	0.135173	0.0837582	0.0122078	-0.0275641	-0.0456314	-0.0651703	-0.0753614	-0.0659352	-0.0642589	-0.0729508	-0.0680623	-0.0602746	-0.0597775	-0.0630722	-0.0817108	-0.0779984	-0.0609456	-0.0258662	-0.0122599	-0.0119106	-0.000760115	0.0173367	-0.00133828	-0.0222858	-0.0353639	-0.0421218	-0.0452497	-0.0106988	0.00441918	-0.049478			0	-0.00275399	-0.0817108	-0.0789569		0.0576221	0.0930611	0.035439		0.0815697	0.197355	0.115786
	2	0.0495806	0.0453909	0.0302001	0.000154805	-0.0271588	-0.0367188	-0.0343837	-0.0151697	-0.00533381	-0.00168285	-0.023921	-0.0257714	0.00286003	0.000457835	-0.0143913	-0.0505989	-0.0873298	-0.116634	-0.115247	-0.109929	-0.122678	-0.134012	-0.139551	-0.129434	-0.111136	-0.118381	-0.12212	-0.121172	-0.119703	-0.117934	-0.116773			0	-0.00173112	-0.122678	-0.120947		-0.137181	-0.100984	0.0361968		-0.111589	-0.146328	-0.0347394
	3	-0.015182	-0.00347281	0.000548346	-0.00565187	-0.0105386	0.0134808	0.0155868	-7.5611e-05	0.023915	0.0477297	0.0147815	0.00563645	0.00828742	0.0057046	0.00283904	0.00695943	0.0163909	0.0322512	0.00622566	-0.0266393	-0.0115631	0.0070922	0.0237372	0.0133941	-0.00168365	0.00821116	0.0163255	0.0201589	0.0328492	0.0449402	0.0257876			0	0.00737466	-0.0266393	-0.0340139		0.0253137	0.0562574	0.0309437		0.0165421	0.0520784	0.0355363
	4	-0.0264851	-0.0216311	0.014601	0.0186433	-0.0464564	-0.0451567	-0.0400285	-0.0683378	-0.0563204	-0.012718	-0.0548586	-0.068935	-0.033317	-0.0346291	-0.0366856	-0.00787228	-0.0142709	-0.0458501	-0.0582531	-0.0606728	-0.058042	-0.0294506	-0.00611823	-0.0330469	-0.0614833	-0.0802493	-0.0325515	-0.0182387	-0.0480056	-0.0460533	-0.0376663			0	-0.0307953	-0.0606728	-0.0298775		-0.0154223	0.0626729	0.0780951		-0.00253826	0.0987982	0.101337
	5	0.0430509	0.0450013	0.0276006	-0.0334953	-0.0612821	-0.0713832	-0.0621627	-0.0666559	-0.0967107	-0.0830027	-0.0560854	-0.0497338	-0.0534963	-0.0914603	-0.120342	-0.136711	-0.12079	-0.111196	-0.122514	-0.124417	-0.122547	-0.12609	-0.130478	-0.131633	-0.105981	0.000660897	-0.0130822	-0.0365699	0.010712	0.0322705	0.0349545			0	-0.0377387	-0.136711	-0.0989723		-0.00274282	-0.0738276	-0.0710848		-0.0414369	-0.130676	-0.0892392
	6	0.0709384	0.0748724	0.0554516	0.0461071	0.0511541	0.0644603	0.0762404	0.0583923	0.0434819	0.0355279	0.0433698	0.0505326	0.0367097	0.0496414	0.092208	0.0242582	-0.0141871	0.0440924	0.0355557	-0.00686272	-0.0296053	-0.0345056	-0.0275856	-0.017763	-0.011817	-0.0394901	-0.0457119	-0.0369081	-0.0743638	-0.105599	-0.0278697			0	0.0563633	-0.0296053	-0.0859686		-0.00898943	-0.121629	-0.11264		-0.0241509	0.051598	0.0757489
																																			average			-0.0747893				-0.000508293				0.0340714
		0.0462236	0.045889	0.03536	0.00632765	-0.0203076	-0.0201582	-0.0183197	-0.027868	-0.0261505	-0.0130675	-0.0249441	-0.0260556	-0.0165385	-0.0216772	-0.0232407	-0.0409459	-0.0496976	-0.043047	-0.0466831	-0.0567968	-0.059391	-0.0529544	-0.0437766	-0.0499702	-0.0523978	-0.044102	-0.039877	-0.0396632	-0.0348683	-0.031326	-0.0285075
MEAN		0.0657531	0.0562286	0.0299188	0.0265937	0.0391522	0.0499278	0.0546585	0.0524832	0.0552456	0.0523432	0.0456405	0.0469768	0.0384402	0.0506263	0.0711096	0.0609365	0.0532072	0.0687759	0.0641577	0.0505905	0.0518167	0.0618738	0.0730249	0.0643229	0.0480195	0.0482948	0.0463321	0.0463243	0.0568802	0.0698183	0.0552996			p-values			0.000487396				0.986903				0.327661
STDEV		0.0268436	0.0229552	0.0122143	0.0108568	0.0159838	0.020383	0.0223143	0.0214262	0.0225539	0.021369	0.0186326	0.0191782	0.0156931	0.0206681	0.0290304	0.0248772	0.0217218	0.0280777	0.0261923	0.0206535	0.0211541	0.0252599	0.0298123	0.0262597	0.0196039	0.0197163	0.018915	0.0189118	0.0232212	0.0285032	0.022576
SEM
		0	1	2	3	4	5	6	7	8	9	10	11	12	13	14	15	16	17	18	19	20	21	22	23	24	25	26	27	28	29	30
errorbar+		0.0536872	0.0459105	0.0244286	0.0217137	0.0319676	0.0407659	0.0446285	0.0428524	0.0451078	0.042738	0.0372653	0.0383564	0.0313863	0.0413362	0.0580607	0.0497544	0.0434435	0.0561553	0.0523845	0.0413069	0.0423082	0.0505197	0.0596246	0.0525194	0.0392077	0.0394325	0.03783	0.0378236	0.0464425	0.0570064	0.045152
errorbar-		0.01938	0.0229337	0.0231457	-0.0045292	-0.0362914	-0.0405411	-0.0406339	-0.0492942	-0.0487044	-0.0344365	-0.0435767	-0.0452338	-0.0322316	-0.0423453	-0.0522711	-0.0658231	-0.0714194	-0.0711247	-0.0728754	-0.0774503	-0.0805451	-0.0782142	-0.0735888	-0.0762299	-0.0720017	-0.0638182	-0.058792	-0.058575	-0.0580896	-0.0598292	-0.0510835
mean		0.0462236	0.045889	0.03536	0.00632765	-0.0203076	-0.0201582	-0.0183197	-0.027868	-0.0261505	-0.0130675	-0.0249441	-0.0260556	-0.0165385	-0.0216772	-0.0232407	-0.0409459	-0.0496976	-0.043047	-0.0466831	-0.0567968	-0.059391	-0.0529544	-0.0437766	-0.0499702	-0.0523978	-0.044102	-0.039877	-0.0396632	-0.0348683	-0.031326	-0.0285075
													100 mM NaCl
time (sec.)		0	1	2	3	4	5	6	7	8	9	10	11	12	13	14	15	16	17	18	19	20	21	22	23	24	25	26	27	28	29	30
Larva	1	-0.049478	-0.0416973	0.000636301	0.00806189	0.0215495	0.0824282	0.0906115	0.083376	0.100843	0.138432	0.199079	0.181447	0.0750239	-0.000730295	-0.0303165	0.0177128	0.0412057	0.0497875	0.0759013	0.0930611	0.0727293	0.0195691	-0.0721941	-0.0735192	-0.066479	-0.0457003	-0.0451828	-0.0689658	-0.0484241	-0.00664595	0.0148102
	2	-0.117934	-0.116773	-0.116469	-0.11738	-0.123296	-0.14098	-0.168098	-0.178903	-0.159608	-0.142718	-0.126826	-0.0897929	-0.0717081	-0.097369	-0.100984	-0.0904359	-0.0695345	-0.0554785	-0.0537832	-0.0588099	-0.0757984	-0.0599681	-0.0452398	-0.0721317	-0.0882976	-0.0945584	-0.0891175	-0.0838226	-0.116928	-0.123449	-0.102539
	3	0.0449402	0.0257876	0.0134581	0.0102283	0.0104114	0.0122068	0.0422843	0.054057	0.0371146	0.0197751	0.00818753	0.0089964	0.00524765	-0.0242383	-0.0240845	-0.0107115	0.0126889	0.0303616	0.0385035	0.0485265	0.0562574	0.0542018	0.0483207	0.032122	0.0226759	0.0181631	0.0435209	0.0563996	0.0183334	-0.00592441	-0.0180543
	4	0.0114969	0.032421	0.0355571	-0.0047199	-0.0226835	-0.00859764	-0.0136764	-0.0305402	-0.063761	-0.0621469	-0.0429946	-0.0364184	-0.0159533	0.0385113	0.0267053	0.0116242	0.00974947	0.0030306	-0.00528208	0.0262522	0.0626729	0.088585	0.0859614	0.0777019	0.0624831	0.053834	0.0503763	0.076278	0.0803069	0.0589936	0.0488818
	5	-0.10746	-0.0634872	-0.032074	-0.0203614	-0.00702915	0.0793227	0.0927071	0.023535	0.00637215	0.00031544	-0.0020113	0.00284923	0.0290069	0.0214311	0.00793984	0.0225501	0.0288301	0.0252984	-0.0138589	-0.0738276	-0.0499607	-0.0379385	-0.0412228	-0.0199395	0.0222136	0.0128677	0.0100725	0.0342068	0.0280612	-0.00399789	-0.0366586
	6	0.000506299	-0.0410956	-0.0524322	-0.0305223	0.0111626	0.0621177	0.0535156	0.00719756	-0.0280009	-0.0401451	-0.0411873	-0.0658816	-0.09839	-0.0779148	-0.0496047	-0.0223752	-0.0715838	-0.121629	-0.0927312	-0.067673	-0.0487878	-0.0234372	-0.0134069	-0.0210257	-0.0213353	-0.0168795	0.0129419	0.0441522	0.0632759	0.112786	0.181779
		-0.0363215	-0.0341408	-0.0252206	-0.0257822	-0.0183143	0.0144162	0.016224	-0.00687967	-0.0178401	-0.0144145	-0.000958753	0.000199936	-0.0127955	-0.023385	-0.0283907	-0.0119392	-0.00810734	-0.0114382	-0.00854176	-0.0054118	0.00285211	0.00683535	-0.00629691	-0.0127987	-0.0114566	-0.0120456	-0.00289812	0.00970801	0.00410429	0.00529376	0.0147032
MEAN		0.0665444	0.0562435	0.0547216	0.0475979	0.0537603	0.0846127	0.0983074	0.0928812	0.089445	0.0939684	0.108929	0.0966864	0.0641753	0.0544072	0.0449389	0.0421809	0.0496992	0.0650174	0.0608563	0.0707353	0.0677573	0.0573978	0.0610312	0.0592187	0.0579575	0.0526075	0.0540996	0.0683166	0.0741518	0.0792057	0.0964774
STDEV		0.0271666	0.0229613	0.02234	0.0194318	0.0219476	0.034543	0.0401338	0.0379186	0.0365158	0.0383624	0.0444702	0.039472	0.0261994	0.0222117	0.0183462	0.0172203	0.0202896	0.0265432	0.0248445	0.0288776	0.0276618	0.0234326	0.0249159	0.0241759	0.0236611	0.0214769	0.0220861	0.0278901	0.0302724	0.0323356	0.0393867
SEM
		0	1	2	3	4	5	6	7	8	9	10	11	12	13	14	15	16	17	18	19	20	21	22	23	24	25	26	27	28	29	30
errorbar+		0.0543332	0.0459226	0.04468	0.0388635	0.0438951	0.069086	0.0802677	0.0758372	0.0730315	0.0767249	0.0889404	0.0789441	0.0523989	0.0444233	0.0366925	0.0344406	0.0405792	0.0530865	0.0496889	0.0577551	0.0553236	0.0468651	0.0498318	0.0483519	0.0473221	0.0429538	0.0441721	0.0557803	0.0605447	0.0646712	0.0787735
errorbar-		-0.0634881	-0.0571021	-0.0475606	-0.045214	-0.0402618	-0.0201268	-0.0239099	-0.0447983	-0.0543558	-0.0527769	-0.045429	-0.0392721	-0.038995	-0.0455967	-0.046737	-0.0291595	-0.028397	-0.0379815	-0.0333862	-0.0342894	-0.0248097	-0.0165972	-0.0312128	-0.0369746	-0.0351176	-0.0335225	-0.0249842	-0.0181821	-0.0261681	-0.0270418	-0.0246835
mean		-0.0363215	-0.0341408	-0.0252206	-0.0257822	-0.0183143	0.0144162	0.016224	-0.00687967	-0.0178401	-0.0144145	-0.000958753	0.000199936	-0.0127955	-0.023385	-0.0283907	-0.0119392	-0.00810734	-0.0114382	-0.00854176	-0.0054118	0.00285211	0.00683535	-0.00629691	-0.0127987	-0.0114566	-0.0120456	-0.00289812	0.00970801	0.00410429	0.00529376	0.0147032
													1 M NaCl
time (sec.)		0	1	2	3	4	5	6	7	8	9	10	11	12	13	14	15	16	17	18	19	20	21	22	23	24	25	26	27	28	29	30
Larva	1	0.0148102	0.0418889	0.0766262	0.0519877	0.0149058	0.105965	0.149059	0.151238	0.119848	0.0699385	0.101	0.115279	0.106044	0.0892153	0.0732131	0.114435	0.136493	0.127915	0.150165	0.197355	0.196578	0.18611	0.0905429	0.00215781	-0.0586997	-0.0342623	-0.0188389	-0.0570467	-0.0582619	-0.0408523	-0.0408729
	2	-0.102539	-0.0989643	-0.0982711	-0.107238	-0.118215	-0.127888	-0.116648	-0.0998149	-0.101404	-0.110718	-0.145777	-0.141439	-0.1296	-0.142919	-0.146328	-0.120224	-0.0962879	-0.0811355	-0.102498	-0.112263	-0.0876085	-0.0399314	0.0200451	0.0387917	0.0540904	0.0713993	0.0862475	0.0960935	0.0724646	0.048165	0.0395895
	3	-0.0180543	-0.0127237	0.00404061	0.0558287	0.0504805	0.0144794	0.0250448	0.0337327	0.0340733	0.0185433	-0.023482	0.00232484	0.035953	0.0520784	0.0336631	-0.0274648	-0.0202537	-0.00641944	0.00405966	-0.000205615	-0.0195712	-0.0193446	-0.016507	-0.0034213	0.0115991	0.0246076	0.000609738	-0.0232009	0.0081066	0.0286001	0.0381268
	4	-0.0423315	-0.0304854	0.019457	0.00846466	6.44829e-05	-0.00220622	-0.00132635	0.00227776	0.0149918	0.00954413	-0.00637117	0.0108059	0.011762	-0.0188365	0.0134037	0.04768	0.0508798	0.0711735	0.0987982	0.0433243	0.0289413	0.0540995	0.0501006	0.0393369	0.0232557	0.0218624	0.0222259	0.0107195	0.00312067	0.000112973	0.0161528
	5	-0.0461788	-0.0483037	-0.029987	-0.0426387	-0.0569483	-0.0338723	-0.0244131	-0.0234996	-0.0264074	-0.0370422	-0.0865145	-0.0870079	0.0286801	0.0286473	-0.0132684	-0.0914346	-0.119738	-0.100424	-0.102221	-0.116775	-0.130676	-0.144751	-0.159162	-0.154339	-0.133511	-0.126667	-0.114405	-0.0522785	-0.0469314	-0.075068	-0.0860831
	6	0.0103511	0.00552983	-0.0133556	-0.0526353	-0.0606609	-0.0238302	-0.018136	-0.0179047	-0.0540752	-0.0502903	0.00934734	0.00904383	0.000996806	-0.0223583	-0.0223362	-0.00241062	0.0245251	0.0304531	-0.0216545	-0.000947803	0.051598	0.0450721	0.0176528	-0.0648743	-0.0395111	0.00185247	-0.0143125	-0.0180129	-0.0104105	-0.0236434	-0.0361636
MEAN		-0.030657	-0.0238431	-0.00691498	-0.0143718	-0.0283955	-0.0112253	0.00226334	0.00767157	-0.00216238	-0.0166708	-0.0252997	-0.0151656	0.00897267	-0.00236216	-0.0102755	-0.0132365	-0.00406353	0.00692721	0.00444153	0.00174796	0.00654353	0.0135425	0.000445419	-0.0237247	-0.0237961	-0.00686793	-0.0064122	-0.00728767	-0.00531866	-0.0104476	-0.0115418
STDEV		0.0434788	0.0481513	0.0578176	0.0644056	0.061368	0.0758388	0.0864273	0.0830648	0.0769747	0.0629581	0.084588	0.089094	0.0772176	0.0809189	0.0750019	0.0870537	0.0956454	0.0880642	0.103569	0.1158	0.115776	0.11083	0.0860527	0.0744589	0.0678758	0.0680003	0.0653216	0.0563566	0.0466095	0.0454886	0.0507372
SEM		0.0177501	0.0196577	0.0236039	0.0262935	0.0250534	0.0309611	0.0352838	0.0339111	0.0314248	0.0257025	0.0345329	0.0363725	0.031524	0.033035	0.0306194	0.0355395	0.0390471	0.035952	0.0422819	0.0472752	0.0472653	0.0452462	0.0351308	0.0303977	0.0277102	0.027761	0.0266674	0.0230075	0.0190282	0.0185706	0.0207134
		0	1	2	3	4	5	6	7	8	9	10	11	12	13	14	15	16	17	18	19	20	21	22	23	24	25	26	27	28	29	30
errorbar+		0.0355003	0.0393154	0.0472079	0.052587	0.0501068	0.0619221	0.0705676	0.0678221	0.0628495	0.051405	0.0690658	0.0727449	0.0630479	0.06607	0.0612388	0.071079	0.0780942	0.0719041	0.0845638	0.0945503	0.0945307	0.0904924	0.0702617	0.0607955	0.0554204	0.055522	0.0533348	0.0460149	0.0380565	0.0371413	0.0414268
errorbar-		-0.0484072	-0.0435007	-0.0305189	-0.0406653	-0.0534489	-0.0421863	-0.0330205	-0.0262395	-0.0335872	-0.0423733	-0.0598326	-0.0515381	-0.0225513	-0.0353971	-0.0408949	-0.048776	-0.0431106	-0.0290248	-0.0378404	-0.0455272	-0.0407218	-0.0317037	-0.0346854	-0.0541225	-0.0515063	-0.0346289	-0.0330796	-0.0302951	-0.0243469	-0.0290182	-0.0322551
mean		-0.030657	-0.0238431	-0.00691498	-0.0143718	-0.0283955	-0.0112253	0.00226334	0.00767157	-0.00216238	-0.0166708	-0.0252997	-0.0151656	0.00897267	-0.00236216	-0.0102755	-0.0132365	-0.00406353	0.00692721	0.00444153	0.00174796	0.00654353	0.0135425	0.000445419	-0.0237247	-0.0237961	-0.00686793	-0.0064122	-0.00728767	-0.00531866	-0.0104476	-0.0115418
Figure 3D
Calcium imaging raw traces
																																				T-test
SS01716													500 mM Fructose																						Chance	500mM Fructose				100mM NaCl				1M NaCl
time (sec.)		0	1	2	3	4	5	6	7	8	9	10	11	12	13	14	15	16	17	18	19	20	21	22	23	24										before	Max response	Normalized response		before	Max response	Normalized response		before	Max response	Normalized response
Larva	1	-0.0372823	-0.0209031	-0.0177723	-0.0186038	-0.0115194	-0.0678859	-0.0416806	-0.0148432	-0.0168328	-0.0515143	-0.0299923	-0.0190144	-0.0251938	-0.0790555	-0.0650132	-0.0459955	-0.0300386	-0.0181759	-0.0501759	-0.048273	-0.0354442	-0.0266476	-0.0201872	-0.0221954	-0.0193473									0	-0.0298936	-0.0790555	-0.0491618		-0.00765445	-0.0417941	-0.0341397		-0.00739862	0.0643773	0.0717759
	2	0.041259	0.0464152	0.0548086	-0.0136012	-0.0029724	-0.0359104	-0.0165038	-0.00572542	-0.0526691	-0.00615805	0.0226155	-0.00977722	0.0331306	0.0272915	0.00116449	-0.0622731	-0.0539963	-0.0212493	-0.0207766	-0.0169029	-0.0316967	0.00917258	0.0322346	-0.0390996	-0.0308073									0	0.00286891	-0.0622731	-0.0651421		-0.00156878	0.0457457	0.0473144		-0.0173573	0.052105	0.0694623
	3	-0.000397991	0.0271543	0.0708295	0.00468676	-0.0210139	0.0824634	0.00827647	-0.00159135	0.0018656	0.0529927	0.0546379	0.00586342	0.0319305	0.0415954	0.0385059	0.0305378	0.0117575	0.00810346	0.00304625	0.0337528	0.0167094	-0.0290212	0.00176305	0.00874967	0.0555857									0	0.0254458	0.0415954	0.0161497		-0.0026962	-0.0311026	-0.0284064		0.010533	0.204307	0.193774
	4	0.121085	0.106577	0.0577937	0.0513053	0.0844113	0.131228	0.146313	0.0954503	0.0302262	0.030502	0.027111	0.0315929	-0.00284477	0.0334291	0.0674337	0.0336028	0.0138426	0.0373426	0.00490845	-0.0140788	0.0371918	0.0428576	0.0547807	0.0373229	0.0262082									0	0.0801821	0.0674337	-0.0127484		0.00723538	0.0444781	0.0372427		0.0294744	0.172264	0.14279
	5	-0.0602919	-0.0339795	-0.0519196	-0.0319381	-0.0187666	-0.0370811	-0.0287355	-0.0750565	-0.0821062	-0.0679489	-0.0312783	-0.0211457	-0.0228191	-0.0704468	-0.0138011	-0.0462045	-0.0454265	-0.0534443	-0.0796339	-0.0438385	-0.0711638	-0.0371125	-0.0442606	-0.0661006	-0.0650719									0	-0.0471911	-0.0704468	-0.0232557		-0.00113732	-0.0541205	-0.0529831		-0.00955936	0.0549307	0.0644901
	6	0.046394	0.0872235	0.0767153	0.0496445	0.0392149	0.0537959	0.100038	0.0468	0.0800782	0.0413048	0.0690725	0.0606126	0.129426	0.158705	0.057399	0.00102909	0.0345806	0.0519181	0.0984208	0.129432	0.17552	0.290423	0.232631	0.216182	0.247149									0	0.0627529	0.158705	0.095952		0.0144104	0.237608	0.223198		0.0924763	0.468753	0.376277
	7	-0.0283148	-0.00755761	-0.0282443	-0.0224855	-0.000824366	0.00562489	0.0121541	0.0155672	-0.038384	-0.023796	-0.0111633	-0.0456719	-0.015725	0.00609572	-0.0154738	-0.0485123	-0.0571714	-0.0766091	-0.0310599	-0.0415519	-0.0706285	-0.0368859	-0.0372114	0.00884392	0.0052855									0	-0.011584	-0.0571714	-0.0455875		-0.00179921	-0.0714185	-0.0696193		-0.0125387	0.0518239	0.0643626
																																			average			-0.0119705				0.0175152				0.140419
MEAN		0.0117787	0.0354145	0.0317425	0.00691558	0.011559	0.0211017	0.0279513	0.00750564	-0.00657303	-0.000136973	0.0186944	0.00802194	0.0239383	0.0185864	0.0142815	-0.0148839	-0.0115468	0.000749119	-0.00736849	0.00668192	0.0151862	0.0416121	0.0428269	0.0224764	0.0356193
STDEV		0.0624127	0.0564353	0.0533144	0.0357294	0.0419445	0.0793933	0.0769824	0.0580553	0.0580848	0.050504	0.0419136	0.0323251	0.0576084	0.0870856	0.0500388	0.0420998	0.0363516	0.0394726	0.0611312	0.066873	0.0876486	0.125544	0.0995207	0.101552	0.112075									p-values			0.572814				0.459645				0.0111946
SEM		0.0235898	0.0230396	0.0217655	0.0145865	0.0171238	0.0324122	0.0314279	0.023701	0.023713	0.0206182	0.0171112	0.0131967	0.0235185	0.0355526	0.0204283	0.0171872	0.0148405	0.0161146	0.0249567	0.0273008	0.0357824	0.0512533	0.0406292	0.0414582	0.0457546
		0	1	2	3	4	5	6	7	8	9	10	11	12	13	14	15	16	17	18	19	20	21	22	23	24
errorbar+		0.0471795	0.0460792	0.043531	0.029173	0.0342476	0.0648243	0.0628559	0.047402	0.047426	0.0412363	0.0342223	0.0263933	0.0470371	0.0711051	0.0408565	0.0343744	0.0296809	0.0322293	0.0499134	0.0546016	0.0715648	0.102507	0.0812583	0.0829165	0.0915091
errorbar-		-0.0118111	0.0123749	0.00997703	-0.0076709	-0.00556481	-0.0113105	-0.0034766	-0.0161953	-0.030286	-0.0207551	0.00158322	-0.00517472	0.000419745	-0.0169661	-0.0061468	-0.0320711	-0.0263873	-0.0153655	-0.0323252	-0.0206189	-0.0205962	-0.0096412	0.00219774	-0.0189818	-0.0101352
mean		0.0117787	0.0354145	0.0317425	0.00691558	0.011559	0.0211017	0.0279513	0.00750564	-0.00657303	-0.000136973	0.0186944	0.00802194	0.0239383	0.0185864	0.0142815	-0.0148839	-0.0115468	0.000749119	-0.00736849	0.00668192	0.0151862	0.0416121	0.0428269	0.0224764	0.0356193
													100 mM NaCl
time (sec.)		0	1	2	3	4	5	6	7	8	9	10	11	12	13	14	15	16	17	18	19	20	21	22	23	24
Larva	1	-0.0402683	0.0606353	0.0298753	-0.0137528	0.020715	-0.0229779	-0.0231578	-0.0129914	-0.00992277	-0.0502977	-0.022056	-0.00542112	-0.00213033	0.0122666	-0.0292037	-0.0417941	-0.0359619	0.00625874	0.0204802	0.0190835	0.0188579	0.0224956	-0.0268706	0.0187581	0.027874
	2	-0.0275273	0.000999599	-0.0149121	0.0146545	0.00768495	-0.0163602	0.00480671	0.0150986	-0.0142066	0.0195772	-0.00707192	0.0397613	0.0457457	0.0391614	-0.0190835	-0.0248048	-0.0144912	0.032395	0.0743407	0.0515614	0.0166754	-0.00807749	-0.0250048	0.000544959	-0.00900313
	3	0.033292	0.0508692	-0.0170224	-0.0284333	0.00292295	-0.00133593	-0.0139925	-0.00512194	-0.0240538	-0.0256326	-0.00114992	0.00668745	-0.00795094	-0.0311026	0.0146875	0.0153013	0.000696373	-0.01463	0.0262326	-0.00202986	-0.0197604	-0.0124778	-0.00766486	-0.0277673	-0.060101
	4	0.0121575	0.0159509	-0.0254544	-0.0223672	0.00728679	0.0144166	0.0317717	-0.0284128	-0.0268053	0.0498387	0.0512067	0.0303915	0.0350404	0.0398408	0.0444781	0.0412412	0.0411076	0.0606855	0.0763755	0.10364	0.0746009	0.0571212	0.0275101	-0.00481924	-0.0186462
	5	0.05301	0.0530338	0.070044	-0.00855864	0.00668961	-0.0106317	-0.0343212	-0.0308778	-0.0656934	-0.0606484	0.0154431	-0.00215559	0.0229294	-0.0541205	-0.000128209	0.00100879	-0.020889	0.029876	0.0257438	-0.037739	-0.0657978	-0.0337209	-0.00657238	-0.00312871	-0.00439616
	6	-0.0216892	-0.0192538	-0.00815768	-0.0215605	-0.0185066	-0.0085673	-0.0249849	0.0229219	0.0631029	0.098048	0.0971614	0.0640891	0.106701	0.198688	0.237608	0.222951	0.128199	0.0710226	0.115934	0.0854594	0.10575	0.103315	0.219347	0.113396	0.123198
	7	0.0373795	0.0169	0.0314641	0.0166383	-0.0328739	0.0522251	-0.0316449	-0.0193748	-0.0203126	-0.0165349	-0.0536574	-0.0714185	-0.00347756	0.00266701	-0.0264337	-0.0545793	-0.0358191	-0.0227377	-0.0216333	0.00179973	-0.0156656	-0.00684706	-0.0168227	-0.00357434	-0.0301137
MEAN		0.00662202	0.0255907	0.00940527	-0.00905423	-0.000868748	0.000966947	-0.0130747	-0.00839403	-0.0139845	0.00205006	0.0114109	0.00884773	0.0281225	0.0296287	0.0317036	0.0227606	0.00897738	0.0232671	0.0453534	0.0316821	0.01638	0.0174012	0.0234174	0.0133442	0.00411596
STDEV		0.036529	0.0300124	0.0351095	0.018045	0.0183142	0.0255363	0.0237051	0.0207817	0.0385975	0.0571397	0.0496763	0.0432886	0.0403631	0.0821653	0.0944561	0.0943026	0.0588553	0.0357063	0.045899	0.0507814	0.0584082	0.0478334	0.0882832	0.0461539	0.0588828
SEM		0.0138067	0.0113436	0.0132702	0.00682035	0.00692213	0.00965181	0.00895967	0.00785475	0.0145885	0.0215968	0.0187759	0.0163615	0.0152558	0.0310555	0.0357011	0.035643	0.0222452	0.0134957	0.0173482	0.0191936	0.0220762	0.0180793	0.0333679	0.0174445	0.0222556
		0	1	2	3	4	5	6	7	8	9	10	11	12	13	14	15	16	17	18	19	20	21	22	23	24
errorbar+		0.0276133	0.0226872	0.0265403	0.0136407	0.0138443	0.0193036	0.0179193	0.0157095	0.029177	0.0431936	0.0375518	0.0327231	0.0305117	0.0621111	0.0714021	0.071286	0.0444904	0.0269914	0.0346963	0.0383871	0.0441525	0.0361586	0.0667358	0.0348891	0.0445112
errorbar-		-0.00718463	0.0142471	-0.00386489	-0.0158746	-0.00779088	-0.00868486	-0.0220344	-0.0162488	-0.028573	-0.0195467	-0.00736502	-0.00751381	0.0128667	-0.00142688	-0.00399751	-0.0128824	-0.0132678	0.00977144	0.0280052	0.0124885	-0.00569619	-0.00067808	-0.0099505	-0.00410037	-0.0181397
mean		0.00662202	0.0255907	0.00940527	-0.00905423	-0.000868748	0.000966947	-0.0130747	-0.00839403	-0.0139845	0.00205006	0.0114109	0.00884773	0.0281225	0.0296287	0.0317036	0.0227606	0.00897738	0.0232671	0.0453534	0.0316821	0.01638	0.0174012	0.0234174	0.0133442	0.00411596
													1 M NaCl
time (sec.)		0	1	2	3	4	5	6	7	8	9	10	11	12	13	14	15	16	17	18	19	20	21	22	23	24
Larva	1	0.0194198	0.0320683	-0.00354536	-0.0317551	-0.0203798	-0.0239938	-0.0222647	0.0226705	-0.00708684	-0.0234527	-0.0230651	0.00199222	0.0594385	0.0643773	0.0263057	-0.0315845	0.0146004	0.00559408	-0.0119274	-0.0168258	0.0047315	0.0157401	-0.0135454	-0.027136	-0.00789723
	2	-0.026507	-0.040686	-0.0586511	-0.00348346	-7.86442e-05	0.0119776	-0.0018896	-0.00665311	-0.00419277	-0.00324878	-0.0575173	0.0467401	0.0252732	0.0334556	0.052105	0.0250369	0.051276	-0.000542502	-0.00570466	-0.0470447	-0.0174834	-0.0454563	-0.0057474	-0.00703499	-0.0181792
	3	-0.00221791	-0.0350873	0.0124342	0.0188696	0.0232108	0.00220059	0.0147261	-0.00185101	0.00866599	0.0320127	0.0428989	0.171612	0.204307	0.157168	0.0652284	0.0654777	0.0886444	0.0549534	0.0103605	-0.0138485	-0.0356307	-0.0180531	-0.0348118	-0.00358827	-0.0189131
	4	0.0234804	-0.0130827	-0.017914	0.0563797	0.00119921	0.0465237	0.0256158	0.0291739	0.0394585	0.0595767	0.0738074	0.0862019	0.105487	0.129144	0.172264	0.133333	0.125673	0.199873	0.133751	0.128098	0.150585	0.101642	0.0758313	0.0883839	0.0993784
	5	-0.0454559	0.0134657	-0.00751265	0.0311225	0.0319857	-0.0054478	0.0136086	-0.0288859	-0.0472422	-0.0383165	-0.0224746	-0.00464029	0.0101645	0.0142616	0.0415998	0.0549307	-0.0812187	-0.00462377	-0.00618692	-0.050759	-0.0090695	-0.0448047	-0.0391997	0.00694236	0.0224586
	6	0.175847	0.0243676	0.0476396	-0.00229973	0.0669435	0.0275085	0.115853	0.117684	0.172933	0.134909	0.135855	0.178316	0.209532	0.260949	0.260883	0.440876	0.468753	0.290573	0.319313	0.285874	0.367417	0.362889	0.35764	0.37833	0.43423
	7	-0.0245771	-0.0344272	-0.00129766	-0.00977184	-0.023748	-0.0130219	0.0101606	-0.0246628	0.0144594	0.00874982	-0.0397891	0.00916947	0.000105967	0.0242565	0.00832416	0.0518239	0.0468454	-0.000531921	0.00184902	-0.0654795	-0.0152942	-0.0317968	0.00939294	-0.0438119	-0.0250873
MEAN		-0.00625613	-0.00866441	-0.0150378	0.0142267	0.00718747	0.00625206	0.00595925	0.00289087	-0.00207946	0.0053143	0.00272985	0.0603812	0.080934	0.0796815	0.0715006	0.0494387	0.0397951	0.0510509	0.0240585	-7.59013e-05	0.0186266	0.00181358	-0.0034946	0.0115134	0.0153695
STDEV		0.029608	0.0311928	0.0267105	0.0335853	0.0207383	0.0260897	0.0185738	0.0234807	0.0312653	0.0401924	0.0538422	0.0722188	0.07809	0.0614443	0.0581065	0.0601785	0.0793288	0.0865898	0.0618783	0.07361	0.0752012	0.0611597	0.0465143	0.0447098	0.0498746
SEM		0.0132411	0.0139498	0.0119453	0.0150198	0.00927445	0.0116677	0.00830646	0.0105009	0.0139823	0.0179746	0.024079	0.0322972	0.0349229	0.0274787	0.025986	0.0269127	0.0354769	0.0387241	0.0276728	0.0329194	0.033631	0.0273515	0.0208018	0.0199948	0.0223046
		0	1	2	3	4	5	6	7	8	9	10	11	12	13	14	15	16	17	18	19	20	21	22	23	24
errorbar+		0.0264822	0.0278997	0.0238906	0.0300396	0.0185489	0.0233354	0.0166129	0.0210018	0.0279645	0.0359492	0.048158	0.0645944	0.0698458	0.0549575	0.051972	0.0538253	0.0709539	0.0774483	0.0553456	0.0658388	0.067262	0.0547029	0.0416037	0.0399896	0.0446092
errorbar-		-0.0194972	-0.0226143	-0.0269831	-0.000793126	-0.00208698	-0.00541563	-0.00234721	-0.00761001	-0.0160617	-0.0126603	-0.0213491	0.028084	0.0460111	0.0522028	0.0455146	0.022526	0.00431815	0.0123267	-0.00361433	-0.0329953	-0.0150045	-0.0255379	-0.0242964	-0.00848142	-0.0069351
mean		-0.00625613	-0.00866441	-0.0150378	0.0142267	0.00718747	0.00625206	0.00595925	0.00289087	-0.00207946	0.0053143	0.00272985	0.0603812	0.080934	0.0796815	0.0715006	0.0494387	0.0397951	0.0510509	0.0240585	-7.59013e-05	0.0186266	0.00181358	-0.0034946	0.0115134	0.0153695
Figure 3E
Calcium imaging raw traces
																																				T-test
R58E02													500 mM Fructose																						Chance	500mM Fructose				100mM NaCl				1M NaCl
time (sec.)		0	1	2	3	4	5	6	7	8	9	10	11	12	13	14	15	16	17	18	19	20	21	22	23	24	25	26	27	28	29	30				before	Max response	Normalized response		before	Max response	Normalized response		before	Max response	Normalized response
Larva	1	-0.454019	-0.459121	-0.440008	-0.447753	-0.52096	-0.451056	-0.481826	-0.460782	-0.358556	-0.297283	-0.526067	-0.216953	-0.191611	-0.29855	-0.393685	-0.106492	0.079043	0.0141602	-0.000587023	0.163676	0.607837	0.550908	0.653479	1	0.853187	0.195718	0.104682	0.558815	0.0611177	-0.11865	0.195718			0	-0.445221	0.607837	1.05306		-0.106911	-0.314583	-0.207672		-0.0565441	-0.305356	-0.248812
	2	0.108847	0.137306	0.282986	0.170412	0.119877	0.226639	0.285073	0.252153	-0.412258	-0.220436	0.448708	0.999997	0.975568	0.7187	0.840397	0.609938	-0.440732	0.173187	0.70558	0.824596	0.494592	-0.00594184	-0.240177	-0.133544	0.0527721	-0.0738939	-0.128704	-0.141073	0.475001	0.690896	0.445243			0	0.12721	0.999997	0.872788		0.0669662	-0.378863	-0.445829		0.0316683	-0.413066	-0.444734
	3	0.239122	0.132296	0.117851	-0.18351	-0.265888	0.30194	0.196178	-0.024134	-0.127085	-0.13956	-0.137823	0.12755	0.204614	0.194704	0.596307	0.789478	0.726185	0.206171	-0.127823	0.139	0.0954475	0.0125618	0.0122115	-0.108251	-0.335179	-0.0281081	-0.0150099	-0.274497	-0.102357	-0.0195697	-0.0496573			0	0.00994429	0.789478	0.779534		0.111074	1	0.888926		-0.0576336	-0.440586	-0.382952
	4	0.0968141	0.0539025	-0.216891	-0.0824295	-0.0765798	-0.23	-0.0419377	0.26667	0.541005	0.373241	0.221457	0.167096	0.347913	0.444046	0.427916	0.403524	0.416228	0.611587	0.903891	0.999998	0.746844	0.168451	-0.120238	-0.096168	-0.100064	-0.0674134	0.244893	0.151779	-0.0529797	-0.197734	-0.201098			0	0.0822956	0.999998	0.917702		-0.000129946	0.483609	0.483739		0.175113	-0.237801	-0.412914
	5	-0.275879	-0.408604	-0.31833	-0.166777	-0.125417	-0.107277	-0.115192	-0.193974	-0.235937	-0.18818	-0.0830842	0.355855	0.999997	0.978108	0.566333	0.375479	0.344299	0.300681	0.0196728	-0.279832	-0.239458	-0.0819791	0.0648012	0.220199	0.255534	-0.0119683	-0.219224	-0.178169	-0.089904	0.0328506	0.186551			0	-0.201696	0.999997	1.20169		0.149356	-0.197826	-0.347182		0.0265198	-0.127821	-0.15434
																																			average			0.964955				0.0743967				-0.32875
MEAN		-0.0570229	-0.108844	-0.114879	-0.142011	-0.173794	-0.0519509	-0.031541	-0.0320135	-0.118566	-0.0944437	-0.0153619	0.286709	0.467296	0.407402	0.407454	0.414385	0.225005	0.261157	0.300147	0.369488	0.341053	0.1288	0.0740152	0.176447	0.14525	0.00286694	-0.00267261	0.0233708	0.0581755	0.0775587	0.115351
STDEV		0.293421	0.299071	0.304125	0.221908	0.238243	0.314999	0.300817	0.308261	0.384946	0.267661	0.371432	0.449131	0.514666	0.491824	0.471856	0.33611	0.437747	0.221434	0.469347	0.529567	0.405194	0.252904	0.345012	0.482603	0.4508	0.110908	0.184218	0.33896	0.241767	0.354224	0.24886			p-values			1.11144e-06				0.782581				0.000327731
SEM		0.131222	0.133749	0.136009	0.0992401	0.106546	0.140872	0.134529	0.137858	0.172153	0.119702	0.166109	0.200858	0.230165	0.21995	0.21102	0.150313	0.195766	0.0990285	0.209899	0.23683	0.181208	0.113102	0.154294	0.215826	0.201604	0.0495998	0.0823847	0.151587	0.108122	0.158414	0.111293
		0	1	2	3	4	5	6	7	8	9	10	11	12	13	14	15	16	17	18	19	20	21	22	23	24	25	26	27	28	29	30
errorbar+		0.262444	0.267498	0.272017	0.19848	0.213091	0.281744	0.269059	0.275717	0.344306	0.239403	0.332219	0.401715	0.460331	0.439901	0.42204	0.300626	0.391533	0.198057	0.419797	0.473659	0.362417	0.226204	0.308588	0.431653	0.403207	0.0991996	0.164769	0.303175	0.216243	0.316828	0.222587
errorbar-		-0.188245	-0.242593	-0.250887	-0.241252	-0.280339	-0.192823	-0.16607	-0.169872	-0.290719	-0.214145	-0.181471	0.0858516	0.237131	0.187452	0.196433	0.264073	0.0292383	0.162129	0.0902482	0.132658	0.159844	0.0156978	-0.0802789	-0.0393792	-0.0563536	-0.0467328	-0.0850573	-0.128217	-0.0499462	-0.0808553	0.00405798
mean		0.0284705	-0.0233507	-0.0293851	-0.056518	-0.0883001	0.0335425	0.0539524	0.0534799	-0.0330727	-0.00895027	0.0701315	0.372203	0.55279	0.492895	0.492947	0.499879	0.310498	0.346651	0.38564	0.454981	0.426546	0.214293	0.159509	0.261941	0.230744	0.0883603	0.0828208	0.108864	0.143669	0.163052	0.200845
													100 mM NaCl
time (sec.)		0	1	2	3	4	5	6	7	8	9	10	11	12	13	14	15	16	17	18	19	20	21	22	23	24	25	26	27	28	29	30
Larva	1	0.195718	0.104682	0.165572	0.0611177	-0.11865	-0.0972824	-0.140231	-0.389086	-0.234412	-0.31677	-0.406684	-0.27234	-0.130628	-0.11176	-0.162133	-0.0921655	0.0183896	-0.224994	-0.314583	-0.0967238	0.0618102	0.0634926	-0.0201223	-0.0120262	-0.024624	0.115281	0.190089	0.101784	-0.175771	0.0570367	0.0504732
	2	0.445243	0.258442	0.09861	-0.0356937	0.0613953	0.197242	0.217024	0.158495	-0.0456498	-0.341903	-0.276575	0.113442	-0.149945	-0.1957	0.239556	-0.0424556	-0.332565	-0.378863	-0.25362	-0.0963092	-0.23936	-0.253168	-0.222521	-0.260345	-0.250997	-0.172081	-0.167528	-0.161019	-0.130075	0.281294	0.589839
	3	-0.0496573	0.209662	0.398918	0.201753	0.121433	0.105502	0.321469	0.149143	-0.264444	-0.0607537	0.0887915	0.149276	0.0315409	-0.024218	0.00576928	-0.182395	-0.305649	0.117709	0.680119	1	0.145771	-0.238059	-0.359704	-0.402326	-0.345209	-0.134626	-0.172648	-0.160089	0.0648342	0.140891	0.133192
	4	-0.201098	-0.164729	0.0515103	0.0466159	0.0202357	0.179574	0.217869	0.205359	-0.210361	-0.186961	0.0405554	0.247986	0.126673	-0.0899646	0.082148	0.0787996	0.010483	-0.00431189	0.171262	0.483609	0.414448	0.27644	0.090382	-0.0447411	-0.0647359	-0.0606227	-0.193798	-0.157082	0.0177676	-0.117778	-0.0394512
	5	0.186551	0.195318	0.0502307	-0.0225952	-0.023089	-0.0232728	0.101814	0.305665	0.324295	0.302389	0.245612	0.0380481	-0.077124	-0.0208792	0.0387529	0.0189115	-0.0341509	-0.0777885	-0.117763	-0.155584	-0.197826	-0.218559	-0.0585044	0.144429	0.0397832	-0.243005	-0.285068	-0.159787	-0.0537231	0.0180751	0.0546877
MEAN		0.115351	0.120675	0.152968	0.0502396	0.012265	0.0723524	0.143589	0.0859153	-0.0861145	-0.1208	-0.0616601	0.0552825	-0.0398965	-0.0885044	0.0408186	-0.0438609	-0.128699	-0.11365	0.033083	0.226999	0.0369687	-0.0739707	-0.114094	-0.115002	-0.129157	-0.0990109	-0.125791	-0.107239	-0.0553934	0.0759037	0.157748
STDEV		0.24886	0.168953	0.145304	0.0945745	0.0905313	0.128562	0.176671	0.272694	0.244594	0.261898	0.270522	0.198107	0.116809	0.0720067	0.144591	0.100639	0.175228	0.193328	0.4073	0.504746	0.267596	0.235386	0.17735	0.215942	0.162128	0.13669	0.182833	0.116856	0.0998474	0.148004	0.24916
SEM		0.111293	0.0755583	0.0649821	0.042295	0.0404868	0.0574947	0.0790095	0.121952	0.109386	0.117124	0.120981	0.0885961	0.0522386	0.0322024	0.0646632	0.0450072	0.0783642	0.0864589	0.18215	0.225729	0.119673	0.105268	0.0793132	0.0965723	0.0725057	0.0611295	0.0817654	0.0522597	0.0446531	0.0661896	0.111428
		0	1	2	3	4	5	6	7	8	9	10	11	12	13	14	15	16	17	18	19	20	21	22	23	24	25	26	27	28	29	30
errorbar+		0.222587	0.151117	0.129964	0.08459	0.0809737	0.114989	0.158019	0.243905	0.218771	0.234249	0.241963	0.177192	0.104477	0.0644047	0.129326	0.0900144	0.156728	0.172918	0.3643	0.451459	0.239345	0.210536	0.158626	0.193145	0.145011	0.122259	0.163531	0.104519	0.0893063	0.132379	0.222855
errorbar-		0.00405798	0.0451168	0.087986	0.00794461	-0.0282219	0.0148578	0.0645794	-0.0360372	-0.1955	-0.237924	-0.182641	-0.0333136	-0.0921351	-0.120707	-0.0238446	-0.0888681	-0.207063	-0.200109	-0.149067	0.00126927	-0.082704	-0.179239	-0.193407	-0.211574	-0.201662	-0.16014	-0.207556	-0.159498	-0.100047	0.00971408	0.0463204
mean		0.115351	0.120675	0.152968	0.0502396	0.012265	0.0723524	0.143589	0.0859153	-0.0861145	-0.1208	-0.0616601	0.0552825	-0.0398965	-0.0885044	0.0408186	-0.0438609	-0.128699	-0.11365	0.033083	0.226999	0.0369687	-0.0739707	-0.114094	-0.115002	-0.129157	-0.0990109	-0.125791	-0.107239	-0.0553934	0.0759037	0.157748
													1 M NaCl
time (sec.)		0	1	2	3	4	5	6	7	8	9	10	11	12	13	14	15	16	17	18	19	20	21	22	23	24	25	25	25	25	25	25
Larva	1	0.0504732	0.190089	0.101784	-0.175771	0.0570367	0.0504732	-0.112213	-0.260174	-0.25988	-0.122284	-0.141519	-0.305356	-0.285482	-0.100167	-0.162011	-0.214982	-0.172505	-0.256862	-0.313043	-0.000173464	-0.0295229	-0.239016	-0.0598951	-0.00586772	-0.285981	0.33674	-0.239016	-0.0598951	-0.00586772	-0.285981	0.33674
	2	0.589839	0.0469936	-0.104755	-0.131611	0.0759592	0.0176245	-0.240603	0.00453276	0.0493076	-0.172429	0.213493	0.390402	-0.220703	-0.403591	-0.413066	0.21897	0.087929	-0.292505	-0.217416	-0.225555	-0.355445	-0.53594	-0.492699	0.0300897	0.163239	0.182649	0.0375316	-0.11751	-0.196063	-0.0991903	-0.110082
	3	0.133192	-0.1973	-0.233828	-0.217427	-0.0543764	0.198131	0.413011	0.0205109	-0.197567	-0.244781	-0.253535	-0.243279	-0.166902	-0.32914	-0.440586	0.180631	0.0236467	-0.343414	-0.356882	-0.295227	-0.142834	-0.255885	-0.323615	-0.337289	0.0302737	0.269629	0.191945	0.118328	0.0849591	0.107866	0.137623
	4	-0.0394512	0.346963	0.182977	0.14091	0.222042	0.228517	0.228176	0.223702	0.345905	0.264529	-0.218032	-0.0449779	-0.0172125	-0.237801	-0.176613	-0.145974	-0.160302	-0.104312	-0.0308133	0.0139742	0.00531344	-0.0437594	-0.212581	-0.0828593	0.0489839	0.0565579	0.0971408	0.199021	0.397436	0.229821	-0.0284829
	5	0.0546877	0.0444649	0.0176592	-0.0418492	-0.1435	-0.148198	0.00958756	0.114508	0.13892	0.149826	0.0956131	-0.018256	-0.0803731	-0.123021	-0.127821	-0.0635891	0.00699747	0.0623861	0.0992444	0.0510473	-0.0605236	-0.0820595	-0.0749661	-0.0656775	-0.0555528	-0.0368534	0.19894	0.521348	0.384295	-0.0681074	-0.152175
MEAN		0.157748	0.086242	-0.00723258	-0.0851496	0.0314322	0.0693096	0.0595916	0.0206159	0.0153369	-0.0250277	-0.0607959	-0.0442934	-0.154134	-0.238744	-0.264019	-0.00498862	-0.0428466	-0.186941	-0.163782	-0.0911868	-0.116602	-0.231332	-0.232751	-0.0923207	-0.0198074	0.161745	0.0573083	0.132258	0.132952	-0.0231182	0.0367246
STDEV		0.24916	0.20152	0.165484	0.142167	0.138686	0.151886	0.262422	0.179695	0.248382	0.220167	0.204991	0.272666	0.107279	0.130329	0.149988	0.194949	0.116849	0.16546	0.193201	0.157528	0.14433	0.194238	0.180977	0.14428	0.167982	0.152647	0.178866	0.252661	0.256393	0.198773	0.201046
SEM		0.111428	0.0901226	0.0740067	0.0635792	0.0620221	0.0679256	0.117358	0.0803621	0.11108	0.0984617	0.0916748	0.12194	0.0479765	0.0582848	0.0670768	0.0871838	0.0522565	0.073996	0.0864021	0.0704486	0.0645465	0.0868659	0.0809355	0.0645241	0.075124	0.068266	0.0799913	0.112993	0.114663	0.0888941	0.0899103
		0	1	2	3	4	5	6	7	8	9	10	11	12	13	14	15	16	17	18	19	20	21	22	23	24	25	26	27	28	29	30
errorbar+		0.222855	0.180245	0.148013	0.127158	0.124044	0.135851	0.234717	0.160724	0.22216	0.196923	0.18335	0.24388	0.095953	0.11657	0.134154	0.174368	0.104513	0.147992	0.172804	0.140897	0.129093	0.173732	0.161871	0.129048	0.150248	0.136532	0.159983	0.225986	0.229325	0.177788	0.179821
errorbar-		0.0463204	-0.00388058	-0.0812393	-0.148729	-0.0305899	0.00138392	-0.0577669	-0.0597461	-0.0957429	-0.123489	-0.152471	-0.166233	-0.202111	-0.297029	-0.331096	-0.0921724	-0.0951032	-0.260937	-0.250184	-0.161635	-0.181149	-0.318198	-0.313687	-0.156845	-0.0949314	0.0934785	-0.022683	0.0192652	0.0182894	-0.112012	-0.0531857
mean		0.157748	0.086242	-0.00723258	-0.0851496	0.0314322	0.0693096	0.0595916	0.0206159	0.0153369	-0.0250277	-0.0607959	-0.0442934	-0.154134	-0.238744	-0.264019	-0.00498862	-0.0428466	-0.186941	-0.163782	-0.0911868	-0.116602	-0.231332	-0.232751	-0.0923207	-0.0198074	0.161745	0.0573083	0.132258	0.132952	-0.0231182	0.0367246
