# Supplementary material for: Four individually identified paired dopamine neurons signal taste punishment in larval Drosophila
Source: eLife. 2025 Jun 16;12:RP91387. doi: 10.7554/eLife.91387 (PMC12169853; doi:10.7554/eLife.91387)
Supplement: Figure 4—figure supplement 1—source data 1. [file elife-91387-fig4-figsupp1-data1.xlsx]

## Sheet: Figure 4-FigSuppl 1
Figure 4 - Figure Supplement 1A
w1118 > UAS-hid,rpr			SS02160 > w1118			SS02160 > UAS-hid,rpr				Statistical Analysis	(A) w1118 > UAS-hid,rpr	(B) SS02160 > w1118	(C) SS02160 > UAS-hid,rpr
Pref1	Pref 2	PI	Pref1	Pref 2	PI	Pref1	Pref 2	PI
-0.333333	0.0571429	-0.138095	-0.44	0.04	-0.2	-0.633333	-0.382353	-0.507843
-0.647059	-0.411765	-0.529412	-0.411765	-0.09375	-0.252757	-0.36	-0.266667	-0.313333		Number of values	20	15	15
-0.571429	0.176471	-0.197479	-0.666667	-0.357143	-0.511905	-0.241379	0.0344828	-0.103448		Test for normal distribution: Shapiro-Wilk test
-0.34375	0.222222	-0.0607639	-0.586207	-0.321429	-0.453818	-0.64	0	-0.32		W	0.9488	0.9656	0.9507
-0.285714	-0.0555556	-0.170635	-0.181818	0.206897	0.0125392	-0.413793	0.230769	-0.0915119		P value	0.3494	0.7878	0.5354
-0.535714	-0.28125	-0.408482	-0.625	-0.294118	-0.459559	-0.727273	-0.0625	-0.394886		Passed normality test (alpha=0.05)?	Yes	Yes	Yes
-0.514286	0.28125	-0.116518	-0.794118	-0.457143	-0.62563	-0.848485	0.0571429	-0.395671		P value summary	ns	ns	ns
-0.375	-0.103448	-0.239224	-0.631579	0.030303	-0.300638	-0.540541	-0.297297	-0.418919		One sample t test
-0.823529	-0.125	-0.474265	-0.625	-0.212121	-0.418561	-0.228571	-0.2	-0.214286		Theoretical mean	0	0	0
-0.837838	0.121212	-0.358313	-0.75	-0.305556	-0.527778	-0.2	-0.0606061	-0.130303		Actual mean	-0.278	-0.3453	-0.3127
-0.714286	0.257143	-0.228571	-0.484848	0.193548	-0.14565	-0.518519	-0.689655	-0.604087		t, df	t=7.747, df=19	t=7.604, df=14	t=7.509, df=14
-0.615385	0.459459	-0.0779626	-0.272727	-0.162162	-0.217445	-0.617647	-0.416667	-0.517157		P value (two tailed)	<0.0001	<0.0001	<0.0001
-0.472222	-0.0263158	-0.249269	-0.365854	-0.0625	-0.214177	-0.4	-0.181818	-0.290909		P value summary	****	****	****
-0.771429	0.0857143	-0.342857	-0.5	-0.177778	-0.338889	-0.512821	-0.0232558	-0.268038		Significant (alpha=0.05)?	Yes	Yes	Yes
-0.625	0.45	-0.0875	-0.657895	-0.375	-0.516447	-0.516129	0.258065	-0.129032
-0.459459	-0.0512821	-0.255371								Ordinary one-way ANOVA
-0.75	-0.025	-0.3875								F	0.5656
-0.486486	0.194444	-0.146021								P value	0.6387
-0.846154	-0.0689655	-0.45756								P value summary	ns
-0.606061	-0.619048	-0.612554								Significant diff. among means (P < 0.05)?	No
										R squared	0.01318
										Tukey's multiple comparisons test	Mean Diff.	95.00% CI of diff.	Significant?	Summary	Adjusted P Value
										A vs B	0.06733	-0.06924 to 0.2039	No	ns	0.5751
										A vs C	0.03467	-0.1019 to 0.1712	No	ns	0.9115
										B vs C	-0.03267	-0.1787 to 0.1133	No	ns	0.9372
Figure 4 - Figure Supplement 1B
w1118 > UAS-hid,rpr			MB328B > w1118			MB328B > UAS-hid,rpr				Statistical Analysis	(A) w1118 > UAS-hid,rpr	(B) MB328B > w1118	(C) MB328B > UAS-hid,rpr
Pref1	Pref 2	PI	Pref1	Pref 2	PI	Pref1	Pref 2	PI
-0.333333	0.0571429	-0.138095	-0.512821	-0.125	-0.31891	-0.516129	-0.2	-0.358065
-0.647059	-0.411765	-0.529412	-0.678571	-0.0555556	-0.367063	-0.633333	-0.241379	-0.437356		Number of values	20	15	20
-0.571429	0.176471	-0.197479	-0.594595	-0.133333	-0.363964	-0.594595	-0.142857	-0.368726		Test for normal distribution: Shapiro-Wilk test
-0.34375	0.222222	-0.0607639	-0.653846	-0.0357143	-0.34478	-0.612903	-0.275862	-0.444383		W	0.9488	0.9693	0.9034
-0.285714	-0.0555556	-0.170635	-0.612903	-0.222222	-0.417563	-0.193548	-0.428571	-0.31106		P value	0.3494	0.8474	0.0478
-0.535714	-0.28125	-0.408482	-0.5	0.185185	-0.157407	-0.777778	-0.107143	-0.44246		Passed normality test (alpha=0.05)?	Yes	Yes	No
-0.514286	0.28125	-0.116518	-0.62069	0.0344828	-0.293103	-0.75	-0.037037	-0.393519		P value summary	ns	ns	*
-0.375	-0.103448	-0.239224	-0.735294	-0.588235	-0.661765	-0.653846	0	-0.326923		Wilcoxon Signed Rank Test
-0.823529	-0.125	-0.474265	-0.216216	-0.290323	-0.253269	-0.703704	0.28	-0.211852		Theoretical median	0	0	0
-0.837838	0.121212	-0.358313	-0.666667	0.166667	-0.25	-0.647059	0.34375	-0.151654		Actual median	-0.245	-0.36	-0.365
-0.714286	0.257143	-0.228571	-0.666667	-0.3	-0.483333	-0.59375	0.193548	-0.200101		Sum of signed ranks (W)	-210	-120	-210
-0.615385	0.459459	-0.0779626	-0.724138	-0.172414	-0.448276	-0.633333	-0.16129	-0.397312		Sum of positive ranks	0	0	0
-0.472222	-0.0263158	-0.249269	-0.378378	-0.125	-0.251689	-0.69697	0.266667	-0.215152		Sum of negative ranks	-210	-120	-210
-0.771429	0.0857143	-0.342857	-0.658537	-0.378378	-0.518457	-0.757576	-0.138889	-0.448232		P value (two tailed)	<0.0001	<0.0001	<0.0001
-0.625	0.45	-0.0875	-0.666667	-0.37931	-0.522989	-0.794872	0.205882	-0.294495		Exact or estimate?	Exact	Exact	Exact
-0.459459	-0.0512821	-0.255371				-0.470588	-0.28125	-0.375919		P value summary	****	****	****
-0.75	-0.025	-0.3875				-0.272727	-0.125	-0.198864		Significant (alpha=0.05)?	Yes	Yes	Yes
-0.486486	0.194444	-0.146021				-0.6875	0	-0.34375		Kruskal-Wallis test
-0.846154	-0.0689655	-0.45756				-0.666667	-0.121212	-0.393939		P value	0.1361
-0.606061	-0.619048	-0.612554				-0.676471	-0.0909091	-0.38369		Exact or approximate P value?	Approximate
										P value summary	ns
										Do the medians vary signif. (P < 0.05)?	No
										Number of groups	3
										Kruskal-Wallis statistic	3.988
										Dunn's multiple comparison test	Mean rank diff.	Significant?	Summary	Adjusted P Value
										A vs B	10.63	No	ns	0.1555
										A vs C	6.6	No	ns	0.5771
										B vs C	-4.033	No	ns	>0.9999
Figure 4 - Figure Supplement 1C
w1118 > UAS-hid,rpr			SS02180 > w1118			SS02180 > UAS-hid,rpr				Statistical Analysis	(A) w1118 > UAS-hid,rpr	(B) SS02180 > w1118	(C) SS02180 > UAS-hid,rpr
Pref1	Pref 2	PI	Pref1	Pref 2	PI	Pref1	Pref 2	PI
-0.333333	0.0571429	-0.138095	-0.361111	0.212121	-0.0744949	-0.466667	-0.0333333	-0.25
-0.647059	-0.411765	-0.529412	-0.571429	0.157895	-0.206767	-0.1	-0.0333333	-0.0666667		Number of values	20	20	20
-0.571429	0.176471	-0.197479	-0.555556	-0.0277778	-0.291667	-0.1	0.0333333	-0.0333333		Test for normal distribution: Shapiro-Wilk test
-0.34375	0.222222	-0.0607639	-0.314286	0.114286	-0.1	-0.387097	0.0666667	-0.160215		W	0.9488	0.9566	0.9698
-0.285714	-0.0555556	-0.170635	-0.30303	0.03125	-0.13589	-0.466667	-0.333333	-0.4		P value	0.3494	0.4783	0.751
-0.535714	-0.28125	-0.408482	-0.129032	0.0555556	-0.0367384	-0.588235	-0.0625	-0.325368		Passed normality test (alpha=0.05)?	Yes	Yes	Yes
-0.514286	0.28125	-0.116518	-0.545455	-0.21875	-0.382102	-0.37931	0.0625	-0.158405		P value summary	ns	ns	ns
-0.375	-0.103448	-0.239224	-0.794872	-0.21875	-0.506811	-0.419355	0.2	-0.109677		One sample t test
-0.823529	-0.125	-0.474265	-0.4	0.125	-0.1375	-0.363636	0.235294	-0.0641711		Theoretical mean	0	0	0
-0.837838	0.121212	-0.358313	-0.487179	0.102564	-0.192308	-0.611111	0.375	-0.118056		Actual mean	-0.278	-0.2605	-0.199
-0.714286	0.257143	-0.228571	-0.294118	-0.027027	-0.160572	-0.40625	-0.0967742	-0.251512		t, df	t=7.747, df=19	t=8.914, df=19	t=8.398, df=19
-0.615385	0.459459	-0.0779626	-0.65	-0.0540541	-0.352027	-0.74359	0.1875	-0.278045		P value (two tailed)	<0.0001	<0.0001	<0.0001
-0.472222	-0.0263158	-0.249269	-0.542857	0.0277778	-0.25754	-0.764706	0.0588235	-0.352941		P value summary	****	****	****
-0.771429	0.0857143	-0.342857	-0.232558	-0.105263	-0.168911	-0.828571	0.235294	-0.296639		Significant (alpha=0.05)?	Yes	Yes	Yes
-0.625	0.45	-0.0875	-0.545455	-0.2	-0.372727	-0.575758	0.333333	-0.121212
-0.459459	-0.0512821	-0.255371	-0.608696	-0.133333	-0.371014	-0.243243	0.0857143	-0.0787645		Ordinary one-way ANOVA
-0.75	-0.025	-0.3875	-0.516129	-0.176471	-0.3463	-0.513514	0.075	-0.219257		F	1.911
-0.486486	0.194444	-0.146021	-0.285714	-0.375	-0.330357	-0.529412	0.111111	-0.20915		P value	0.1573
-0.846154	-0.0689655	-0.45756	-0.655172	-0.04	-0.347586	-0.435897	-0.135135	-0.285516		P value summary	ns
-0.606061	-0.619048	-0.612554	-0.6	-0.258065	-0.429032	-0.384615	0	-0.192308		Significant diff. among means (P < 0.05)?	No
										R squared	0.06283
										Tukey's multiple comparisons test	Mean Diff.	95.00% CI of diff.	Below threshold?	Summary	Adjusted P Value
										A vs B	-0.0175	-0.1197 to 0.08466	No	ns	0.9107
										A vs C	-0.079	-0.1812 to 0.02316	No	ns	0.1595
										B vs C	-0.0615	-0.1637 to 0.04066	No	ns	0.3232
Figure 4 - Figure Supplement 1D
w1118 > UAS-hid,rpr			SS01716 > w1118			SS01716 > UAS-hid,rpr				Statistical Analysis	(A) w1118 > UAS-hid,rpr	(B) SS01716 > w1118	(C) SS01716 > UAS-hid,rpr
Pref1	Pref 2	PI	Pref1	Pref 2	PI	Pref1	Pref 2	PI
-0.333333	0.0571429	-0.138095	-0.555556	-0.111111	-0.333333	-0.21875	0.125	-0.046875
-0.647059	-0.411765	-0.529412	-0.227273	-0.241379	-0.234326	-0.5	0.25	-0.125		Number of values	20	15	20
-0.571429	0.176471	-0.197479	-0.371429	-0.025	-0.198214	-0.421053	-0.030303	-0.225678		Test for normal distribution: Shapiro-Wilk test
-0.34375	0.222222	-0.0607639	-0.515152	0.15625	-0.179451	-0.366667	-0.264706	-0.315686		W	0.9488	0.9513	0.9118
-0.285714	-0.0555556	-0.170635	-0.6	0.114286	-0.242857	-0.413793	-0.323529	-0.368661		P value	0.3494	0.5448	0.069
-0.535714	-0.28125	-0.408482	-0.647059	0	-0.323529	-0.28125	-0.189189	-0.23522		Passed normality test (alpha=0.05)?	Yes	Yes	Yes
-0.514286	0.28125	-0.116518	-0.516129	-0.275862	-0.395996	-0.405405	0.235294	-0.0850556		P value summary	ns	ns	ns
-0.375	-0.103448	-0.239224	-0.571429	0.103448	-0.23399	-0.666667	0	-0.333333		One sample t test
-0.823529	-0.125	-0.474265	-0.71875	-0.25	-0.484375	-0.571429	-0.0833333	-0.327381		Theoretical mean	0	0	0
-0.837838	0.121212	-0.358313	-0.555556	-0.1	-0.327778	-0.189189	0.151515	-0.018837		Actual mean	-0.278	-0.3027	-0.237
-0.714286	0.257143	-0.228571	-0.807692	0.310345	-0.248674	-0.25	0.242424	-0.00378788		t, df	t=7.747, df=19	t=13.84, df=14	t=6.490, df=19
-0.615385	0.459459	-0.0779626	-0.451613	-0.0714286	-0.261521	-0.424242	-0.176471	-0.300357		P value (two tailed)	<0.0001	<0.0001	<0.0001
-0.472222	-0.0263158	-0.249269	-0.461538	-0.233333	-0.347436	-0.27907	-0.318182	-0.298626		P value summary	****	****	****
-0.771429	0.0857143	-0.342857	-0.59375	-0.0909091	-0.34233	-0.676471	-0.0588235	-0.367647		Significant (alpha=0.05)?	Yes	Yes	Yes
-0.625	0.45	-0.0875	-0.454545	-0.352941	-0.403743	-0.555556	0.0714286	-0.242063
-0.459459	-0.0512821	-0.255371				-0.6	-0.0333333	-0.316667		Ordinary one-way ANOVA
-0.75	-0.025	-0.3875				-0.580645	-0.785714	-0.68318		F	0.9262
-0.486486	0.194444	-0.146021				-0.676471	0.137931	-0.26927		P value	0.4025
-0.846154	-0.0689655	-0.45756				-0.675676	0.366667	-0.154505		P value summary	ns
-0.606061	-0.619048	-0.612554				-0.28125	0.285714	0.00223214		Significant diff. among means (P < 0.05)?	No
										R squared	0.0344
										Tukey's multiple comparisons test	Mean Diff.	95.00% CI of diff.	Below threshold?	Summary	Adjusted P Value
										A vs B	0.02467	-0.09500 to 0.1443	No	ns	0.8729
										A vs C	-0.041	-0.1518 to 0.06979	No	ns	0.6472
										B vs C	-0.06567	-0.1853 to 0.05400	No	ns	0.3885
Figure 4 - Figure Supplement 1E
w1118 > UAS-hid,rpr			SS02160 > w1118			SS02160 > UAS-hid,rpr				Statistical Analysis	(A) w1118 > UAS-hid,rpr	(B) SS02160 > w1118	(C) SS02160 > UAS-hid,rpr
Pref1	Pref 2	PI	Pref1	Pref 2	PI	Pref1	Pref 2	PI
-0.162162	-0.212121	-0.187142	-0.475	0.233333	-0.120833	-0.636364	-0.333333	-0.484848
-0.583333	0.0967742	-0.24328	-0.314286	0.151515	-0.0813853	-0.727273	0.354839	-0.186217		Number of values	25	15	20
-0.708333	-0.192308	-0.45	-0.421053	0.0540541	-0.183499	-0.307692	0.230769	-0.0384615		Test for normal distribution: Shapiro-Wilk test
-0.351351	-0.333333	-0.34	-0.8125	0.206897	-0.302802	-0.439024	-0.025641	-0.232333		W	0.9377	0.9813	0.973
-0.684211	0	-0.34	-0.75	0.121212	-0.314394	-0.641026	0.153846	-0.24359		P value	0.1308	0.9776	0.8165
-0.457143	-0.235294	-0.346218	-0.354839	0.589744	0.117452	-0.190476	0	-0.0952381		Passed normality test (alpha=0.05)?	Yes	Yes	Yes
-0.457143	0.181818	-0.137662	-0.4	0.0769231	-0.161538	-0.411765	-0.195122	-0.303443		P value summary	ns	ns	ns
-0.2	-0.277778	-0.238889	-0.15625	-0.0625	-0.109375	-0.459459	-0.277778	-0.368619		One sample t test
-0.558824	-0.206897	-0.38286	-0.205882	0.172414	-0.0167343	-0.675676	0.264706	-0.205485		Theoretical mean	0	0	0
-0.0571429	-0.147059	-0.102101	-0.317073	-0.162791	-0.239932	-0.37931	0.03125	-0.17403		Actual mean	-0.2092	-0.1827	-0.2415
-0.4	-0.212121	-0.306061	-0.375	-0.28125	-0.328125	-0.344828	0.0714286	-0.1367		t, df	t=9.006, df=24	t=4.848, df=14	t=8.944, df=19
-0.382353	0.189189	-0.0965819	-0.612903	-0.333333	-0.473118	-0.411765	0.3125	-0.0496324		P value (two tailed)	<0.0001	0.0003	<0.0001
-0.4	0.228571	-0.0857143	-0.5	-0.0740741	-0.287037	-0.45	-0.151515	-0.300758		P value summary	****	***	****
-0.285714	-0.121212	-0.203463	-0.461538	0.3	-0.0807692	-0.545455	-0.0277778	-0.286616		Significant (alpha=0.05)?	Yes	Yes	Yes
-0.351351	0.025	-0.163176	-0.583333	0.24	-0.171667	-0.2	-0.2	-0.2
-0.586207	-0.0333333	-0.30977				-0.470588	0.142857	-0.163866		Ordinary one-way ANOVA
-0.764706	0.0645161	-0.350095				-0.388889	0	-0.194444		F	0.9638
-0.514286	0.175	-0.169643				-0.535714	-0.290323	-0.413018		P value	0.3876
-0.516129	0.28125	-0.11744				-0.5	-0.241379	-0.37069		P value summary	ns
-0.580645	0.129032	-0.225806				-0.59375	-0.192308	-0.393029		Significant diff. among means (P < 0.05)?	No
-0.190476	0.102564	-0.043956								R squared	0.03271
-0.236842	0.102564	-0.067139								Tukey's multiple comparisons test	Mean Diff.	95.00% CI of diff.	Below threshold?	Summary	Adjusted P Value
-0.514286	0.346154	-0.0840659								A vs B	-0.02653	-0.1252 to 0.07217	No	ns	0.7949
-0.392857	0.0967742	-0.148041								A vs C	0.0323	-0.05836 to 0.1230	No	ns	0.6691
-0.454545	0.30303	-0.0757576								B vs C	0.05883	-0.04439 to 0.1621	No	ns	0.3624
Figure 4 - Figure Supplement 1F
w1118 > UAS-hid,rpr			MB328B > w1118			MB328B > UAS-hid,rpr				Statistical Analysis	(A) w1118 > UAS-hid,rpr	(B) MB328B > w1118	(C) MB328B > UAS-hid,rpr
Pref1	Pref 2	PI	Pref1	Pref 2	PI	Pref1	Pref 2	PI
-0.162162	-0.212121	-0.187142	-0.558824	0.09375	-0.232537	-0.235294	0.117647	-0.0588235
-0.583333	0.0967742	-0.24328	-0.65625	-0.205882	-0.431066	-0.179487	0.05	-0.0647436		Number of values	25	20	20
-0.708333	-0.192308	-0.45	-0.157895	-0.352941	-0.255418	-0.666667	0	-0.333333		Test for normal distribution: Shapiro-Wilk test
-0.351351	-0.333333	-0.34	-0.12766	-0.0666667	-0.0971631	-0.72973	0.15625	-0.28674		W	0.9377	0.9803	0.9742
-0.684211	0	-0.34	-0.0555556	-0.162162	-0.108859	-0.4375	0.0571429	-0.190179		P value	0.1308	0.9376	0.8405
-0.457143	-0.235294	-0.346218	-0.030303	0.030303	0	-0.344828	0.0625	-0.141164		Passed normality test (alpha=0.05)?	Yes	Yes	Yes
-0.457143	0.181818	-0.137662	-0.411765	0.314286	-0.0487395	-0.4	0.151515	-0.124242		P value summary	ns	ns	ns
-0.2	-0.277778	-0.238889	-0.457143	0.0277778	-0.214683	-0.529412	0.0588235	-0.235294		One sample t test
-0.558824	-0.206897	-0.38286	-0.393939	0	-0.19697	0	-0.030303	-0.0151515		Theoretical mean	0	0	0
-0.0571429	-0.147059	-0.102101	-0.515152	-0.21875	-0.366951	-0.457143	0.371429	-0.0428571		Actual mean	-0.2092	-0.152	-0.158
-0.4	-0.212121	-0.306061	0	-0.0909091	-0.0454545	-0.625	0.342857	-0.141071		t, df	t=9.006, df=24	t=4.993, df=19	t=5.522, df=19
-0.382353	0.189189	-0.0965819	-0.387097	0.102564	-0.142266	-0.405405	0.428571	0.011583		P value (two tailed)	<0.0001	<0.0001	<0.0001
-0.4	0.228571	-0.0857143	-0.171429	0.323529	0.0760504	-0.228571	-0.147059	-0.187815		P value summary	****	****	****
-0.285714	-0.121212	-0.203463	-0.606061	-0.0588235	-0.332442	-0.411765	0.05	-0.180882		Significant (alpha=0.05)?	Yes	Yes	Yes
-0.351351	0.025	-0.163176	0	-0.257143	-0.128571	-0.684211	-0.2	-0.442105
-0.586207	-0.0333333	-0.30977	-0.666667	0.128205	-0.269231	-0.575758	0.0277778	-0.27399		Ordinary one-way ANOVA
-0.764706	0.0645161	-0.350095	-0.314286	0	-0.157143	-0.432432	-0.195122	-0.313777		F	1.431
-0.514286	0.175	-0.169643	0	0	0	-0.0571429	-0.027027	-0.0420849		P value	0.2469
-0.516129	0.28125	-0.11744	-0.1	0.131579	0.0157895	-0.393939	0.0810811	-0.156429		P value summary	ns
-0.580645	0.129032	-0.225806	-0.294118	0.1	-0.0970588	-0.102564	0.210526	0.0539811		Significant diff. among means (P < 0.05)?	No
-0.190476	0.102564	-0.043956								R squared	0.04412
-0.236842	0.102564	-0.067139								Tukey's multiple comparisons test	Mean Diff.	95.00% CI of diff.	Below threshold?	Summary	Adjusted P Value
-0.514286	0.346154	-0.0840659								A vs B	-0.0572	-0.1481 to 0.03369	No	ns	0.2927
-0.392857	0.0967742	-0.148041								A vs C	-0.0512	-0.1421 to 0.03969	No	ns	0.372
-0.454545	0.30303	-0.0757576								B vs C	0.006	-0.08981 to 0.1018	No	ns	0.9876
Figure 4 - Figure Supplement 1G
w1118 > UAS-hid,rpr			SS02180 > w1118			SS02180 > UAS-hid,rpr				Statistical Analysis	(A) w1118 > UAS-hid,rpr	(B) SS02180 > w1118	(C) SS02180 > UAS-hid,rpr
Pref1	Pref 2	PI	Pref1	Pref 2	PI	Pref1	Pref 2	PI
-0.162162	-0.212121	-0.187142	-0.194444	0.0888889	-0.0527778	-0.432432	-0.138889	-0.285661
-0.583333	0.0967742	-0.24328	-0.513514	-0.0882353	-0.300874	-0.210526	-0.0882353	-0.149381		Number of values	25	25	25
-0.708333	-0.192308	-0.45	-0.419355	-0.0909091	-0.255132	-0.147059	0.030303	-0.0583779		Test for normal distribution: Shapiro-Wilk test
-0.351351	-0.333333	-0.34	-0.290323	-0.075	-0.182661	-0.0882353	-0.181818	-0.135027		W	0.9377	0.9315	0.9775
-0.684211	0	-0.34	-0.451613	-0.258065	-0.354839	-0.806452	0.0625	-0.371976		P value	0.1308	0.0941	0.8305
-0.457143	-0.235294	-0.346218	-0.269231	0.0454545	-0.111888	-0.444444	-0.351351	-0.397898		Passed normality test (alpha=0.05)?	Yes	Yes	Yes
-0.457143	0.181818	-0.137662	-0.171429	-0.0857143	-0.128571	-0.6	-0.257143	-0.428571		P value summary	ns	ns	ns
-0.2	-0.277778	-0.238889	-0.371429	-0.212121	-0.291775	-0.393939	-0.0285714	-0.211255		One sample t test
-0.558824	-0.206897	-0.38286	-0.542857	-0.193548	-0.368203	-0.358974	-0.0857143	-0.222344		Theoretical mean	0	0	0
-0.0571429	-0.147059	-0.102101	-0.342857	-0.258065	-0.300461	-0.382353	0.142857	-0.119748		Actual mean	-0.2092	-0.2204	-0.1968
-0.4	-0.212121	-0.306061	-0.5	-0.176471	-0.338235	-0.4	0.2	-0.1		t, df	t=9.006, df=24	t=9.374, df=24	t=8.126, df=24
-0.382353	0.189189	-0.0965819	-0.540541	-0.233333	-0.386937	-0.175	0.236842	0.0309211		P value (two tailed)	<0.0001	<0.0001	<0.0001
-0.4	0.228571	-0.0857143	-0.258065	-0.375	-0.316532	-0.37037	0.0333333	-0.168519		P value summary	****	****	****
-0.285714	-0.121212	-0.203463	-0.484848	-0.129032	-0.30694	-0.482759	-0.1	-0.291379		Significant (alpha=0.05)?	Yes	Yes	Yes
-0.351351	0.025	-0.163176	-0.5625	0.103448	-0.229526	-0.487179	0	-0.24359
-0.586207	-0.0333333	-0.30977	-0.310345	0	-0.155172	-0.705882	0.0294118	-0.338235		Ordinary one-way ANOVA
-0.764706	0.0645161	-0.350095	-0.571429	-0.0625	-0.316964	0	-0.0512821	-0.025641		F	0.249
-0.514286	0.175	-0.169643	-0.30303	0.0909091	-0.106061	-0.351351	-0.323529	-0.33744		P value	0.7802
-0.516129	0.28125	-0.11744	-0.30303	0.0588235	-0.122103	-0.222222	-0.0571429	-0.139683		P value summary	ns
-0.580645	0.129032	-0.225806	-0.184211	-0.0277778	-0.105994	-0.277778	-0.205882	-0.24183		Significant diff. among means (P < 0.05)?	No
-0.190476	0.102564	-0.043956	-0.5625	0.228571	-0.166964	-0.4	0.289474	-0.0552632		R squared	0.006869
-0.236842	0.102564	-0.067139	-0.233333	0.0263158	-0.103509	-0.472222	0.125	-0.173611		Tukey's multiple comparisons test	Mean Diff.	95.00% CI of diff.	Below threshold?	Summary	Adjusted P Value
-0.514286	0.346154	-0.0840659	-0.806452	0	-0.403226	-0.444444	0.28125	-0.0815972		A vs B	0.0112	-0.06887 to 0.09127	No	ns	0.9401
-0.392857	0.0967742	-0.148041	-0.212121	0.189189	-0.011466	-0.5	0.261905	-0.119048		A vs C	-0.0124	-0.09247 to 0.06767	No	ns	0.9272
-0.454545	0.30303	-0.0757576	-0.257143	0.147059	-0.055042	-0.536585	0.0540541	-0.241266		B vs C	-0.0236	-0.1037 to 0.05647	No	ns	0.7611
Figure 4 - Figure Supplement 1H
w1118 > UAS-hid,rpr			SS01716 > w1118			SS01716 > UAS-hid,rpr				Statistical Analysis	(A) w1118 > UAS-hid,rpr	(B) SS01716 > w1118	(C) SS01706 > UAS-hid,rpr
Pref1	Pref 2	PI	Pref1	Pref 2	PI	Pref1	Pref 2	PI
-0.162162	-0.212121	-0.187142	-0.439024	0.1	-0.169512	-0.125	-0.470588	-0.297794
-0.583333	0.0967742	-0.24328	-0.473684	0.425	-0.0243421	-0.578947	-0.384615	-0.481781		Number of values	25	20	20
-0.708333	-0.192308	-0.45	-0.233333	0.0625	-0.0854167	-0.34375	-0.125	-0.234375		Test for normal distribution: Shapiro-Wilk test
-0.351351	-0.333333	-0.34	-0.0625	0.0588235	-0.00183824	-0.193548	-0.258065	-0.225806		W	0.9377	0.9858	0.9255
-0.684211	0	-0.34	0	-0.114286	-0.0571429	-0.8	-0.0322581	-0.416129		P value	0.1308	0.986	0.1265
-0.457143	-0.235294	-0.346218	-0.363636	-0.181818	-0.272727	-0.424242	-0.133333	-0.278788		Passed normality test (alpha=0.05)?	Yes	Yes	Yes
-0.457143	0.181818	-0.137662	-0.46875	-0.314286	-0.391518	-0.483871	-0.266667	-0.375269		P value summary	ns	ns	ns
-0.2	-0.277778	-0.238889	-0.575758	-0.146341	-0.36105	-0.62963	-0.423077	-0.526353		One sample t test
-0.558824	-0.206897	-0.38286	-0.636364	0.0645161	-0.285924	-0.28125	0.0277778	-0.126736		Theoretical mean	0	0	0
-0.0571429	-0.147059	-0.102101	-0.558824	0.421053	-0.0688854	-0.25	-0.0769231	-0.163462		Actual mean	-0.2092	-0.1305	-0.254
-0.4	-0.212121	-0.306061	-0.5	0.441176	-0.0294118	-0.189189	-0.0833333	-0.136261		t, df	t=9.006, df=24	t=4.324, df=19	t=9.238, df=19
-0.382353	0.189189	-0.0965819	-0.75	0.354839	-0.197581	-0.538462	0.114286	-0.212088		P value (two tailed)	<0.0001	0.0004	<0.0001
-0.4	0.228571	-0.0857143	-0.657143	0.25	-0.203571	-0.485714	0.129032	-0.178341		P value summary	****	***	****
-0.285714	-0.121212	-0.203463	-0.606061	0.264706	-0.170677	-0.411765	0	-0.205882		Significant (alpha=0.05)?	Yes	Yes	Yes
-0.351351	0.025	-0.163176	-0.5	0.264706	-0.117647	-0.1	-0.0666667	-0.0833333
-0.586207	-0.0333333	-0.30977	-0.378378	0.162162	-0.108108	-0.472222	0.15625	-0.157986		Ordinary one-way ANOVA
-0.764706	0.0645161	-0.350095	0.2	-0.0967742	0.0516129	-0.5	0.225806	-0.137097		F	5.083
-0.514286	0.175	-0.169643	-0.59375	0.30303	-0.14536	-0.59375	0.0294118	-0.282169		P value	0.009
-0.516129	0.28125	-0.11744	-0.277778	-0.205882	-0.24183	-0.375	0	-0.1875		P value summary	**
-0.580645	0.129032	-0.225806	-0.4	0.289474	-0.0552632	-0.515152	-0.181818	-0.348485		Significant diff. among means (P < 0.05)?	Yes
-0.190476	0.102564	-0.043956								R squared	0.1409
-0.236842	0.102564	-0.067139								Tukey's multiple comparisons test	Mean Diff.	95.00% CI of diff.	Below threshold?	Summary	Adjusted P Value
-0.514286	0.346154	-0.0840659								A vs B	-0.0787	-0.1682 to 0.01081	No	ns	0.0958
-0.392857	0.0967742	-0.148041								A vs C	0.0448	-0.04471 to 0.1343	No	ns	0.4566
-0.454545	0.30303	-0.0757576								B vs C	0.1235	0.02915 to 0.2178	Yes	**	0.0071
