# Supplementary material for: Four individually identified paired dopamine neurons signal taste punishment in larval Drosophila
Source: eLife. 2025 Jun 16;12:RP91387. doi: 10.7554/eLife.91387 (PMC12169853; doi:10.7554/eLife.91387)
Supplement: Figure 4—figure supplement 2—source data 1. [file elife-91387-fig4-figsupp2-data1.xlsx]

## Sheet: Figure 4-FigSuppl 2
Figure 4 - Figure Supplement 2A
w1118 > UAS-hid,rpr			MB328B > w1118			MB328B > UAS-hid,rpr				Statistical Analysis	(A) w1118 > UAS-hid,rpr	(B) MB328B > w1118	(C) MB328B > UAS-hid,rpr
Pref1	Pref 2	PI	Pref1	Pref 2	PI	Pref1	Pref 2	PI
-0.375	-0.633333	-0.504167	-0.153846	-0.230769	-0.192308	-0.538462	-0.08	-0.309231
-0.393939	-0.342857	-0.368398	-0.236842	-0.422222	-0.329532	-0.578947	-0.257143	-0.418045		Number of values	15	15	15
-0.233333	-0.147059	-0.190196	-0.333333	-0.35	-0.341667	-0.347826	-0.0222222	-0.185024		Test for normal distribution: Shapiro-Wilk test
-0.3	-0.724138	-0.512069	-0.517241	-0.405405	-0.461323	-0.27027	-0.34375	-0.30701		W	0.9577	0.9635	0.9234
-0.225806	-0.3	-0.262903	-0.583333	-0.384615	-0.483974	-0.545455	-0.363636	-0.454545		P value	0.6523	0.7524	0.2169
-0.25	-0.272727	-0.261364	-0.315789	-0.292683	-0.304236	-0.606061	-0.285714	-0.445887		Passed normality test (alpha=0.05)?	Yes	Yes	Yes
-0.107143	-0.242424	-0.174784	-0.222222	-0.285714	-0.253968	-0.605263	-0.263158	-0.434211		P value summary	ns	ns	ns
-0.03125	-0.0555556	-0.0434028	-0.1	-0.47619	-0.288095	-0.542857	0.166667	-0.188095		One sample t test
-0.25	0.125	-0.0625	-0.5	-0.636364	-0.568182	-0.4375	-0.225806	-0.331653		Theoretical mean	0	0	0
-0.5	-0.242424	-0.371212	-0.333333	-0.371429	-0.352381	-0.3125	-0.107143	-0.209821		Actual mean	-0.29	-0.3613	-0.296
-0.341463	-0.175	-0.258232	-0.243902	-0.571429	-0.407666	-0.625	-0.322581	-0.47379		t, df	t=8.106, df=14	t=14.01, df=14	t=8.663, df=14
-0.461538	-0.342857	-0.402198	-0.4375	-0.5	-0.46875	-0.25	-0.09375	-0.171875		P value (two tailed)	<0.0001	<0.0001	<0.0001
-0.413793	-0.206897	-0.310345	0	-0.571429	-0.285714	-0.592593	0.259259	-0.166667		P value summary	****	****	****
-0.37931	-0.16129	-0.2703	-0.0606061	-0.589744	-0.325175	-0.0333333	-0.0277778	-0.0305556		Significant (alpha=0.05)?	Yes	Yes	Yes
-0.428571	-0.333333	-0.380952	-0.2	-0.526316	-0.363158	-0.482759	-0.133333	-0.308046
										Ordinary one-way ANOVA
										F	1.509
										P value	0.233
										P value summary	ns
										Significant diff. among means (P < 0.05)?	No
										R squared	0.06703
										Tukey's multiple comparisons test	Mean Diff.	95.00% CI of diff.	Below threshold?	Summary	Adjusted P Value
										A vs B	0.07133	-0.03934 to 0.1820	No	ns	0.2715
										A vs C	0.006	-0.1047 to 0.1167	No	ns	0.9905
										B vs C	-0.06533	-0.1760 to 0.04534	No	ns	0.3329
Figure 4 - Figure Supplement 2B
w1118 > UAS-hid,rpr			SS02180 > w1118			SS02180 > UAS-hid,rpr				Statistical Analysis	(A) w1118 > UAS-hid,rpr	(B) SS02180 > w1118	(C) SS02180 > UAS-hid,rpr
Pref1	Pref 2	PI	Pref1	Pref 2	PI	Pref1	Pref 2	PI
-0.375	-0.633333	-0.504167	-0.5625	-0.0588235	-0.310662	-0.575758	-0.382353	-0.479055
-0.393939	-0.342857	-0.368398	-0.151515	-0.1	-0.125758	-0.25	-0.176471	-0.213235		Number of values	15	15	15
-0.233333	-0.147059	-0.190196	-0.266667	-0.1875	-0.227083	-0.342105	-0.138889	-0.240497		Test for normal distribution: Shapiro-Wilk test
-0.3	-0.724138	-0.512069	-0.0285714	-0.030303	-0.0294372	-0.216216	0.0588235	-0.0786963		W	0.9577	0.9648	0.9815
-0.225806	-0.3	-0.262903	-0.5	-0.225806	-0.362903	-0.470588	-0.28125	-0.375919		P value	0.6523	0.7749	0.9789
-0.25	-0.272727	-0.261364	-0.263158	-0.212121	-0.23764	-0.128205	-0.222222	-0.175214		Passed normality test (alpha=0.05)?	Yes	Yes	Yes
-0.107143	-0.242424	-0.174784	-0.368421	-0.0487805	-0.208601	-0.5	-0.552632	-0.526316		P value summary	ns	ns	ns
-0.03125	-0.0555556	-0.0434028	-0.5	-0.5	-0.5	-0.487805	-0.35	-0.418902		One sample t test
-0.25	0.125	-0.0625	-0.243243	-0.159091	-0.201167	-0.627907	-0.173913	-0.40091		Theoretical mean	0	0	0
-0.5	-0.242424	-0.371212	-0.097561	-0.512821	-0.305191	-0.323529	-0.305556	-0.314542		Actual mean	-0.29	-0.2827	-0.326
-0.341463	-0.175	-0.258232	-0.489362	-0.612903	-0.551132	-0.3	-0.625	-0.4625		t, df	t=8.106, df=14	t=7.968, df=14	t=10.10, df=14
-0.461538	-0.342857	-0.402198	-0.309524	-0.117647	-0.213585	-0.194444	-0.264706	-0.229575		P value (two tailed)	<0.0001	<0.0001	<0.0001
-0.413793	-0.206897	-0.310345	-0.466667	0.0606061	-0.20303	-0.176471	-0.514286	-0.345378		P value summary	****	****	****
-0.37931	-0.16129	-0.2703	-0.45	-0.384615	-0.417308	-0.315789	-0.2	-0.257895		Significant (alpha=0.05)?	Yes	Yes	Yes
-0.428571	-0.333333	-0.380952	-0.166667	-0.516129	-0.341398	-0.410256	-0.305556	-0.357906
										Ordinary one-way ANOVA
										F	0.4507
										P value	0.6402
										P value summary	ns
										Significant diff. among means (P < 0.05)?	No
										R squared	0.02101
										Tukey's multiple comparisons test	Mean Diff.	95.00% CI of diff.	Below threshold?	Summary	Adjusted P Value
										A vs B	-0.007333	-0.1260 to 0.1114	No	ns	0.9877
										A vs C	0.036	-0.08269 to 0.1547	No	ns	0.7431
										B vs C	0.04333	-0.07536 to 0.1620	No	ns	0.6514
Figure 4 - Figure Supplement 2C
w1118 > UAS-hid,rpr			SS01716 > w1118			SS01716 > UAS-hid,rpr				Statistical Analysis	(A) w1118 > UAS-hid,rpr	(B) SS01716 > w1118	(C) SS01716 > UAS-hid,rpr
Pref1	Pref 2	PI	Pref1	Pref 2	PI	Pref1	Pref 2	PI
-0.375	-0.633333	-0.504167	-0.151515	-0.514286	-0.3329	0.0294118	-0.558824	-0.264706
-0.393939	-0.342857	-0.368398	-0.375	-0.648649	-0.511824	-0.444444	0.0909091	-0.176768		Number of values	15	15	15
-0.233333	-0.147059	-0.190196	-0.441176	-0.0909091	-0.266043	-0.16129	-0.323529	-0.24241		Test for normal distribution: Shapiro-Wilk test
-0.3	-0.724138	-0.512069	-0.411765	-0.571429	-0.491597	-0.1875	-0.257143	-0.222321		W	0.9577	0.9106	0.9708
-0.225806	-0.3	-0.262903	0.0769231	-0.484848	-0.203963	-0.512821	-0.235294	-0.374057		P value	0.6523	0.1382	0.8692
-0.25	-0.272727	-0.261364	-0.24	-0.205882	-0.222941	-0.72973	-0.111111	-0.42042		Passed normality test (alpha=0.05)?	Yes	Yes	Yes
-0.107143	-0.242424	-0.174784	-0.333333	-0.230769	-0.282051	-0.387097	-0.342857	-0.364977		P value summary	ns	ns	ns
-0.03125	-0.0555556	-0.0434028	-0.111111	-0.366667	-0.238889	-0.264706	-0.0357143	-0.15021		One sample t test
-0.25	0.125	-0.0625	-0.0588235	-0.727273	-0.393048	-0.742857	-0.242424	-0.492641		Theoretical mean	0	0	0
-0.5	-0.242424	-0.371212	-0.388889	-0.675676	-0.532282	-0.354839	-0.216216	-0.285527		Actual mean	-0.29	-0.392	-0.3267
-0.341463	-0.175	-0.258232	-0.0882353	-0.771429	-0.429832	-0.210526	-0.351351	-0.280939		t, df	t=8.106, df=14	t=12.15, df=14	t=11.01, df=14
-0.461538	-0.342857	-0.402198	-0.545455	-0.571429	-0.558442	-0.435897	-0.121951	-0.278924		P value (two tailed)	<0.0001	<0.0001	<0.0001
-0.413793	-0.206897	-0.310345	-0.466667	-0.387097	-0.426882	-0.62069	-0.269231	-0.44496		P value summary	****	****	****
-0.37931	-0.16129	-0.2703	-0.571429	-0.393939	-0.482684	-0.285714	-0.814815	-0.550265		Significant (alpha=0.05)?	Yes	Yes	Yes
-0.428571	-0.333333	-0.380952	-0.636364	-0.393939	-0.515152	-0.533333	-0.214286	-0.37381
										Ordinary one-way ANOVA
										F	2.502
										P value	0.0941
										P value summary	ns
										Significant diff. among means (P < 0.05)?	No
										R squared	0.1065
										Tukey's multiple comparisons test	Mean Diff.	95.00% CI of diff.	Below threshold?	Summary	Adjusted P Value
										A vs B	0.102	-0.01023 to 0.2142	No	ns	0.0814
										A vs C	0.03667	-0.07556 to 0.1489	No	ns	0.7089
										B vs C	-0.06533	-0.1776 to 0.04689	No	ns	0.3428
