# Supplementary material for: Four individually identified paired dopamine neurons signal taste punishment in larval Drosophila
Source: eLife. 2025 Jun 16;12:RP91387. doi: 10.7554/eLife.91387 (PMC12169853; doi:10.7554/eLife.91387)
Supplement: Figure 4—figure supplement 3—source data 1. [file elife-91387-fig4-figsupp3-data1.xlsx]

## Sheet: Figure 4-FigSuppl 3
Figure 4 - Figure Supplement 3A
w1118 > UAS-hid,rpr			MB328B > w1118			MB328B > UAS-hid,rpr				Statistical Analysis	(A) w1118 > UAS-hid,rpr	(B) MB328B > w1118	(C) MB328B > UAS-hid,rpr
Pref1	Pref 2	PI	Pref1	Pref 2	PI	Pref1	Pref 2	PI
0.133333	0.7	0.416667	0.30303	0.742857	0.522944	-0.1875	0.675676	0.244088
0.0909091	0.433333	0.262121	0.142857	0.125	0.133929	0.366667	0.617647	0.492157		Number of values	15	15	15
-0.03125	0.548387	0.258569	-0.0333333	0.575758	0.271212	0.416667	0.484848	0.450758		Test for normal distribution: Shapiro-Wilk test
0.30303	0.242424	0.272727	-0.433333	0.62069	0.0936782	0.0294118	0.484848	0.25713		W	0.9599	0.9578	0.902
0.4	0.181818	0.290909	0.344828	0.388889	0.366858	-0.37931	-0.0588235	-0.219067		P value	0.6902	0.6546	0.1019
-0.129032	0.448276	0.159622	0.172414	0.166667	0.16954	-0.612903	0.382353	-0.115275		Passed normality test (alpha=0.05)?	Yes	Yes	Yes
0.709677	0.419355	0.564516	0.484848	0.517241	0.501045	-0.0689655	0.7	0.315517		P value summary	ns	ns	ns
0.310345	0.454545	0.382445	0.225806	0.354839	0.290323	0.212121	0.193548	0.202835		One sample t test
-0.235294	0.137931	-0.0486815	0.419355	0.655172	0.537264	0.322581	0.322581	0.322581		Theoretical mean	0	0	0
0.285714	0.4	0.342857	0.818182	0.233333	0.525758	0.214286	0.290323	0.252304		Actual mean	0.3	0.3613	0.2347
0.5	0.5	0.5	0.285714	0.25	0.267857	0.25	0.633333	0.441667		t, df	t=6.403, df=14	t=8.385, df=14	t=4.219, df=14
0.142857	0.206897	0.174877	0.6	-0.0588235	0.270588	0.212121	0.612903	0.412512		P value (two tailed)	<0.0001	<0.0001	0.0009
0.5	0.633333	0.566667	0.413793	0.484848	0.449321	0.241379	0.551724	0.396552		P value summary	****	****	***
-0.0666667	0.0689655	0.00114943	0.642857	0.666667	0.654762	-0.428571	0.666667	0.119048		Significant (alpha=0.05)?	Yes	Yes	Yes
0.37931	0.366667	0.372989	0.612903	0.129032	0.370968	-0.0714286	0	-0.0357143
										Ordinary one-way ANOVA
										F	1.685
										P value	0.1978
										P value summary	ns
										Significant diff. among means (P < 0.05)?	No
										R squared	0.07426
										Tukey's multiple comparisons test	Mean Diff.	95.00% CI of diff.	Below threshold?	Summary	Adjusted P Value
										A vs B	-0.06133	-0.2290 to 0.1063	No	ns	0.6504
										A vs C	0.06533	-0.1023 to 0.2330	No	ns	0.6142
										B vs C	0.1267	-0.04101 to 0.2943	No	ns	0.1706
Figure 4 - Figure Supplement 3B
w1118 > UAS-hid,rpr			SS02180 > w1118			SS02180 > UAS-hid,rpr				Statistical Analysis	(A) w1118 > UAS-hid,rpr	(B) SS02180 > w1118	(C) SS02180 > UAS-hid,rpr
Pref1	Pref 2	PI	Pref1	Pref 2	PI	Pref1	Pref 2	PI
0.363636	0.235294	0.299465	0.689655	0.5	0.594828	0.28125	0.233333	0.257292
0.483871	0.0666667	0.275269	0.241379	0.294118	0.267748	0.741935	0.3	0.520968		Number of values	15	15	15
0.1875	0.555556	0.371528	0.269231	0.62069	0.44496	0.333333	0.413793	0.373563		Test for normal distribution: Shapiro-Wilk test
0.516129	0.8	0.658065	0.533333	0.03125	0.282292	0.344828	-0.0322581	0.156285		W	0.9427	0.9773	0.9441
0.235294	0.344828	0.290061	0.393939	-0.2	0.0969697	0	0.344828	0.172414		P value	0.4176	0.9473	0.4369
0.413793	0.558824	0.486308	-0.133333	0.387097	0.126882	0.172414	0.1875	0.179957		Passed normality test (alpha=0.05)?	Yes	Yes	Yes
0.133333	0.7	0.416667	0.0344828	0.645161	0.339822	0.545455	0.133333	0.339394		P value summary	ns	ns	ns
0.0909091	0.433333	0.262121	0.333333	0.666667	0.5	0.448276	0.354839	0.401557		One sample t test
-0.03125	0.548387	0.258569	0.366667	0.34375	0.355208	-0.178571	0.714286	0.267857		Theoretical mean	0	0	0
0.30303	0.242424	0.272727	0.3	0.03125	0.165625	0	0.677419	0.33871		Actual mean	0.3293	0.3373	0.2633
0.4	0.181818	0.290909	0.46875	0.482759	0.475754	-0.4	0.322581	-0.0387097		t, df	t=7.614, df=14	t=9.445, df=14	t=6.293, df=14
-0.129032	0.448276	0.159622	0.30303	0.516129	0.40958	0.0344828	-0.133333	-0.0494253		P value (two tailed)	<0.0001	<0.0001	<0.0001
0.709677	0.419355	0.564516	-0.0606061	0.6	0.269697	0.482759	0.21875	0.350754		P value summary	****	****	****
0.310345	0.454545	0.382445	-0.09375	0.827586	0.366918	0.09375	0.368421	0.231086		Significant (alpha=0.05)?	Yes	Yes	Yes
-0.235294	0.137931	-0.0486815	0.142857	0.551724	0.347291	0.413793	0.48	0.446897
										Ordinary one-way ANOVA
										F	1.01
										P value	0.3728
										P value summary	ns
										Significant diff. among means (P < 0.05)?	No
										R squared	0.0459
										Tukey's multiple comparisons test	Mean Diff.	95.00% CI of diff.	Below threshold?	Summary	Adjusted P Value
										A vs B	-0.008	-0.1468 to 0.1308	No	ns	0.9893
										A vs C	0.066	-0.07282 to 0.2048	No	ns	0.4863
										B vs C	0.074	-0.06482 to 0.2128	No	ns	0.4058
Figure 4 - Figure Supplement 3C
w1118 > UAS-hid,rpr			SS01716 > w1118			SS01716 > UAS-hid,rpr				Statistical Analysis	(A) w1118 > UAS-hid,rpr	(B) SS01716 > w1118	(C) SS01716 > UAS-hid,rpr
Pref1	Pref 2	PI	Pref1	Pref 2	PI	Pref1	Pref 2	PI
0.310345	0.454545	0.382445	0.580645	0.75	0.665323	0.558824	0.636364	0.597594
-0.235294	0.137931	-0.0486815	0.294118	0.176471	0.235294	0.269231	-0.0625	0.103365		Number of values	15	15	15
0.285714	0.4	0.342857	0.34375	0	0.171875	-0.0967742	0.392857	0.148041		Test for normal distribution: Shapiro-Wilk test
0.5	0.5	0.5	0.857143	0.0344828	0.445813	0.448276	0.482759	0.465517		W	0.9449	0.8964	0.9032
0.142857	0.206897	0.174877	0.322581	0.433333	0.377957	-0.0645161	0.3	0.117742		P value	0.4484	0.0838	0.1065
0.5	0.633333	0.566667	0.09375	0.212121	0.152936	0.371429	0.75	0.560714		Passed normality test (alpha=0.05)?	Yes	Yes	Yes
-0.0666667	0.0689655	0.00114943	0.387097	0.147059	0.267078	0.225806	0.516129	0.370968		P value summary	ns	ns	ns
0.37931	0.366667	0.372989	0.3	0.258065	0.279032	0.310345	0	0.155172		One sample t test
0	0.1875	0.09375	0.172414	0.466667	0.31954	-0.222222	0.28	0.0288889		Theoretical mean	0	0	0
0.387097	0.333333	0.360215	0.133333	0.3	0.216667	0.0333333	0.866667	0.45		Actual mean	0.2347	0.3127	0.264
-0.233333	0.419355	0.0930108	0.117647	0.333333	0.22549	-0.1875	0.586207	0.199353		t, df	t=4.833, df=14	t=7.846, df=14	t=5.446, df=14
0	0.310345	0.155172	0.586207	-0.235294	0.175456	0	0.71875	0.359375		P value (two tailed)	0.0003	<0.0001	<0.0001
-0.0645161	0.354839	0.145161	0.733333	0.352941	0.543137	0	0.419355	0.209677		P value summary	***	****	****
-0.413793	0.483871	0.0350389	0.37931	0.5	0.439655	-0.241379	0.357143	0.0578818		Significant (alpha=0.05)?	Yes	Yes	Yes
0.37931	0.322581	0.350945	0.296296	0	0.148148	-0.433333	0.666667	0.116667
										Ordinary one-way ANOVA
										F	0.7396
										P value	0.4834
										P value summary	ns
										Significant diff. among means (P < 0.05)?	No
										R squared	0.03402
										Tukey's multiple comparisons test	Mean Diff.	95.00% CI of diff.	Below threshold?	Summary	Adjusted P Value
										A vs B	-0.078	-0.2354 to 0.07940	No	ns	0.4575
										A vs C	-0.02933	-0.1867 to 0.1281	No	ns	0.8935
										B vs C	0.04867	-0.1087 to 0.2061	No	ns	0.7346
