# Supplementary material for: Four individually identified paired dopamine neurons signal taste punishment in larval Drosophila
Source: eLife. 2025 Jun 16;12:RP91387. doi: 10.7554/eLife.91387 (PMC12169853; doi:10.7554/eLife.91387)
Supplement: Figure 4—figure supplement 4—source data 1. [file elife-91387-fig4-figsupp4-data1.xlsx]

## Sheet: Figure 4-FigSuppl 4
Figure 4 - Figure Supplement 4A
w1118 > UAS-hid,rpr			SS24765 > w1118			SS24765 > UAS-hid,rpr				Statistical Analysis	(A) w1118 > UAS-hid,rpr	(B) SS24765 > w1118	(C) SS24765 > UAS-hid,rpr
Pref1	Pref 2	PI	Pref1	Pref 2	PI	Pref1	Pref 2	PI
-0.333333	0.0571429	-0.138095	-0.580645	-0.4375	-0.509073	-0.387097	0.16129	-0.112903
-0.647059	-0.411765	-0.529412	-0.542857	-0.517241	-0.530049	-0.709677	-0.366667	-0.538172		Number of values	20	15	15
-0.571429	0.176471	-0.197479	-0.612903	-0.225806	-0.419355	-0.515152	-0.235294	-0.375223		Test for normal distribution: Shapiro-Wilk test
-0.34375	0.222222	-0.0607639	-0.567568	-0.117647	-0.342607	-0.516129	-0.225806	-0.370968		W	0.9488	0.9461	0.9078
-0.285714	-0.0555556	-0.170635	-0.512821	-0.333333	-0.423077	-0.735294	-0.0555556	-0.395425		P value	0.3494	0.4654	0.1252
-0.535714	-0.28125	-0.408482	-0.27027	-0.486486	-0.378378	-0.621622	0.0263158	-0.297653		Passed normality test (alpha=0.05)?	Yes	Yes	Yes
-0.514286	0.28125	-0.116518	-0.571429	-0.236842	-0.404135	-0.594595	-0.419355	-0.506975		P value summary	ns	ns	ns
-0.375	-0.103448	-0.239224	-0.555556	-0.282051	-0.418803	-0.588235	-0.457143	-0.522689		One sample t test
-0.823529	-0.125	-0.474265	-0.659091	-0.175	-0.417045	-0.378378	-0.235294	-0.306836		Theoretical mean	0	0	0
-0.837838	0.121212	-0.358313	-0.348837	-0.153846	-0.251342	-0.413793	-0.181818	-0.297806		Actual mean	-0.278	-0.3813	-0.3547
-0.714286	0.257143	-0.228571	-0.6	-0.441176	-0.520588	-0.375	-0.1875	-0.28125		t, df	t=7.747, df=19	t=14.75, df=14	t=12.56, df=14
-0.615385	0.459459	-0.0779626	-0.75	0.342105	-0.203947	-0.677419	0	-0.33871		P value (two tailed)	<0.0001	<0.0001	<0.0001
-0.472222	-0.0263158	-0.249269	-0.678571	-0.0384615	-0.358516	-0.6	-0.0294118	-0.314706		P value summary	****	****	****
-0.771429	0.0857143	-0.342857	-0.666667	0.172414	-0.247126	-0.181818	-0.526316	-0.354067		Significant (alpha=0.05)?	Yes	Yes	Yes
-0.625	0.45	-0.0875	-0.375	-0.225806	-0.300403	-0.352941	-0.243243	-0.298092
-0.459459	-0.0512821	-0.255371								Ordinary one-way ANOVA
-0.75	-0.025	-0.3875								F	3.023
-0.486486	0.194444	-0.146021								P value	0.0582
-0.846154	-0.0689655	-0.45756								P value summary	ns
-0.606061	-0.619048	-0.612554								Significant diff. among means (P < 0.05)?	No
										R squared	0.114
										Tukey's multiple comparisons test	Mean Diff.	95.00% CI of diff.	Below threshold?	Summary	Adjusted P Value
										A vs B	0.1033	-0.004315 to 0.2110	No	ns	0.0623
										A vs C	0.07667	-0.03098 to 0.1843	No	ns	0.2072
										B vs C	-0.02667	-0.1417 to 0.08841	No	ns	0.8414
Figure 4 - Figure Supplement 4B
w1118 > UAS-hid,rpr			SS21716 > w1118			SS21716 > UAS-hid,rpr				Statistical Analysis	(A) w1118 > UAS-hid,rpr	(B) SS21716 > w1118	(C) SS21716 > UAS-hid,rpr
Pref1	Pref 2	PI	Pref1	Pref 2	PI	Pref1	Pref 2	PI
-0.333333	0.0571429	-0.138095	-0.216216	0.0810811	-0.0675676	-0.621622	-0.0487805	-0.335201
-0.647059	-0.411765	-0.529412	-0.676471	-0.322581	-0.499526	-0.756757	0.285714	-0.235521		Number of values	20	15	15
-0.571429	0.176471	-0.197479	-0.652174	-0.275862	-0.464018	-0.5625	-0.03125	-0.296875		Test for normal distribution: Shapiro-Wilk test
-0.34375	0.222222	-0.0607639	-0.655172	0.047619	-0.303777	-0.633333	0.137931	-0.247701		W	0.9488	0.9655	0.9821
-0.285714	-0.0555556	-0.170635	-0.5	-0.472222	-0.486111	-0.615385	-0.25	-0.432692		P value	0.3494	0.7867	0.9819
-0.535714	-0.28125	-0.408482	-0.416667	-0.7	-0.558333	-0.689655	-0.321429	-0.505542		Passed normality test (alpha=0.05)?	Yes	Yes	Yes
-0.514286	0.28125	-0.116518	-0.485714	-0.296296	-0.391005	-0.576923	-0.15625	-0.366587		P value summary	ns	ns	ns
-0.375	-0.103448	-0.239224	-0.15625	-0.444444	-0.300347	-0.53125	-0.290323	-0.410786		One sample t test
-0.823529	-0.125	-0.474265	-0.607143	-0.322581	-0.464862	-0.551724	-0.0384615	-0.295093		Theoretical mean	0	0	0
-0.837838	0.121212	-0.358313	-0.151515	-0.24	-0.195758	-0.2	-0.0666667	-0.133333		Actual mean	-0.278	-0.3627	-0.39
-0.714286	0.257143	-0.228571	-0.607143	0	-0.303571	-0.357143	-0.538462	-0.447802		t, df	t=7.747, df=19	t=7.450, df=14	t=10.48, df=14
-0.615385	0.459459	-0.0779626	-0.1	-0.121212	-0.110606	-0.6	-0.444444	-0.522222		P value (two tailed)	<0.0001	<0.0001	<0.0001
-0.472222	-0.0263158	-0.249269	-0.392857	-0.391304	-0.392081	-0.586207	-0.0666667	-0.326437		P value summary	****	****	****
-0.771429	0.0857143	-0.342857	-0.3125	0.030303	-0.141098	-0.857143	-0.363636	-0.61039		Significant (alpha=0.05)?	Yes	Yes	Yes
-0.625	0.45	-0.0875	-0.878788	-0.655172	-0.76698	-0.823529	-0.5	-0.661765
-0.459459	-0.0512821	-0.255371								Ordinary one-way ANOVA
-0.75	-0.025	-0.3875								F	2.237
-0.486486	0.194444	-0.146021								P value	0.118
-0.846154	-0.0689655	-0.45756								P value summary	ns
-0.606061	-0.619048	-0.612554								Significant diff. among means (P < 0.05)?	No
										R squared	0.08693
										Tukey's multiple comparisons test	Mean Diff.	95.00% CI of diff.	Below threshold?	Summary	Adjusted P Value
										A vs B	0.08467	-0.05162 to 0.2210	No	ns	0.2985
										A vs C	0.112	-0.02429 to 0.2483	No	ns	0.1262
										B vs C	0.02733	-0.1184 to 0.1730	No	ns	0.8929
Figure 4 - Figure Supplement 4C
w1118 > UAS-hid,rpr			SS01958 > w1118			SS01958 > UAS-hid,rpr				Statistical Analysis	(A) w1118 > UAS-hid,rpr	(B) SS01958 > w1118	(C) SS01958 > UAS-hid,rpr
Pref1	Pref 2	PI	Pref1	Pref 2	PI	Pref1	Pref 2	PI
-0.333333	0.0571429	-0.138095	-0.583333	-0.352941	-0.468137	-0.4	-0.272727	-0.336364
-0.647059	-0.411765	-0.529412	-0.59375	-0.0294118	-0.311581	-0.631579	-0.151515	-0.391547		Number of values	20	15	15
-0.571429	0.176471	-0.197479	-0.8125	-0.28125	-0.546875	-0.583333	0.108108	-0.237613		Test for normal distribution: Shapiro-Wilk test
-0.34375	0.222222	-0.0607639	-0.444444	-0.235294	-0.339869	-0.392857	-0.235294	-0.314076		W	0.9488	0.9694	0.9018
-0.285714	-0.0555556	-0.170635	-0.71875	-0.322581	-0.520665	-0.387097	-0.0526316	-0.219864		P value	0.3494	0.8493	0.1013
-0.535714	-0.28125	-0.408482	-0.828571	-0.121212	-0.474892	-0.666667	-0.285714	-0.47619		Passed normality test (alpha=0.05)?	Yes	Yes	Yes
-0.514286	0.28125	-0.116518	-0.583333	-0.176471	-0.379902	-0.3125	-0.205882	-0.259191		P value summary	ns	ns	ns
-0.375	-0.103448	-0.239224	-0.571429	-0.0857143	-0.328571	-0.289474	-0.21875	-0.254112		One sample t test
-0.823529	-0.125	-0.474265	-0.294118	-0.266667	-0.280392	-0.638889	-0.147059	-0.392974		Theoretical mean	0	0	0
-0.837838	0.121212	-0.358313	-0.766667	-0.0333333	-0.4	-0.516129	-0.266667	-0.391398		Actual mean	-0.278	-0.378	-0.3307
-0.714286	0.257143	-0.228571	-0.685714	0.0333333	-0.32619	-0.03125	-0.0882353	-0.0597426		t, df	t=7.747, df=19	t=13.68, df=14	t=11.81, df=14
-0.615385	0.459459	-0.0779626	-0.482759	0.103448	-0.189655	-0.3125	-0.46875	-0.390625		P value (two tailed)	<0.0001	<0.0001	<0.0001
-0.472222	-0.0263158	-0.249269	-0.733333	-0.194444	-0.463889	-0.689655	-0.212121	-0.450888		P value summary	****	****	****
-0.771429	0.0857143	-0.342857	-0.666667	-0.194444	-0.430556	-0.71875	-0.0909091	-0.40483		Significant (alpha=0.05)?	Yes	Yes	Yes
-0.625	0.45	-0.0875	-0.333333	-0.0857143	-0.209524	-0.633333	-0.142857	-0.388095
-0.459459	-0.0512821	-0.255371								Ordinary one-way ANOVA
-0.75	-0.025	-0.3875								F	2.502
-0.486486	0.194444	-0.146021								P value	0.0927
-0.846154	-0.0689655	-0.45756								P value summary	ns
-0.606061	-0.619048	-0.612554								Significant diff. among means (P < 0.05)?	No
										R squared	0.09623
										Tukey's multiple comparisons test	Mean Diff.	95.00% CI of diff.	Below threshold?	Summary	Adjusted P Value
										A vs B	0.1	-0.008817 to 0.2088	No	ns	0.0775
										A vs C	0.05267	-0.05615 to 0.1615	No	ns	0.476
										B vs C	-0.04733	-0.1637 to 0.06900	No	ns	0.5901
Figure 4 - Figure Supplement 4D
w1118 > UAS-hid,rpr			SS24765 > w1118			SS24765 > UAS-hid,rpr				Statistical Analysis	(A) w1118 > UAS-hid,rpr	(B) SS24765 > w1118	(C) SS24765 > UAS-hid,rpr
Pref1	Pref 2	PI	Pref1	Pref 2	PI	Pref1	Pref 2	PI
-0.25	-0.1875	-0.21875	-0.566667	-0.44	-0.503333	-0.310345	-0.25	-0.280172
-0.121212	0	-0.0606061	-0.447368	0.0689655	-0.189201	-0.310345	0.030303	-0.140021		Number of values	20	15	15
-0.28125	0	-0.140625	-0.517241	-0.16129	-0.339266	-0.459459	-0.121212	-0.290336		Test for normal distribution: Shapiro-Wilk test
-0.444444	-0.0263158	-0.23538	-0.290323	-0.176471	-0.233397	-0.714286	0.0322581	-0.341014		W	0.9587	0.9328	0.9532
-0.176471	-0.333333	-0.254902	-0.594595	-0.171429	-0.383012	-0.181818	-0.342857	-0.262338		P value	0.5179	0.3008	0.5754
-0.555556	-0.0277778	-0.291667	-0.727273	0.0909091	-0.318182	-0.285714	-0.375	-0.330357		Passed normality test (alpha=0.05)?	Yes	Yes	Yes
-0.361111	0.0769231	-0.142094	-0.166667	-0.15625	-0.161458	-0.735294	-0.305556	-0.520425		P value summary	ns	ns	ns
-0.5	0.111111	-0.194444	-0.371429	0	-0.185714	-0.6875	0.233333	-0.227083		One sample t test
-0.428571	0.0285714	-0.2	-0.378378	-0.0263158	-0.202347	-0.567568	0	-0.283784		Theoretical mean	0	0	0
-0.457143	-0.157895	-0.307519	-0.454545	-0.263158	-0.358852	-0.564103	-0.121951	-0.343027		Actual mean	-0.2455	-0.2953	-0.3327
-0.6	-0.125	-0.3625	-0.694444	-0.15625	-0.425347	-0.763158	-0.216216	-0.489687		t, df	t=10.65, df=19	t=10.23, df=14	t=12.84, df=14
-0.647059	-0.166667	-0.406863	-0.65625	-0.166667	-0.411458	-0.515152	-0.4	-0.457576		P value (two tailed)	<0.0001	<0.0001	<0.0001
-0.5	-0.243243	-0.371622	-0.305556	-0.142857	-0.224206	-0.5	-0.171429	-0.335714		P value summary	****	****	****
-0.621622	-0.075	-0.348311	-0.1875	-0.0909091	-0.139205	-0.555556	-0.0487805	-0.302168		Significant (alpha=0.05)?	Yes	Yes	Yes
-0.515152	0.0882353	-0.213458	-0.470588	-0.243243	-0.356916	-0.647059	-0.128205	-0.387632
-0.212121	-0.147059	-0.17959								Ordinary one-way ANOVA
-0.823529	-0.0882353	-0.455882								F	3.03
-0.27027	-0.0526316	-0.161451								P value	0.0578
-0.30303	-0.105263	-0.204147								P value summary	ns
-0.205882	-0.133333	-0.169608								Significant diff. among means (P < 0.05)?	No
										R squared	0.1142
										Tukey's multiple comparisons test	Mean Diff.	95.00% CI of diff.	Below threshold?	Summary	Adjusted P Value
										A vs B	0.04983	-0.03693 to 0.1366	No	ns	0.3542
										A vs C	0.08717	0.0004053 to 0.1739	Yes	*	0.0487
										B vs C	0.03733	-0.05542 to 0.1301	No	ns	0.5967
Figure 4 - Figure Supplement 4E
w1118 > UAS-hid,rpr			SS21716 > w1118			SS21716 > UAS-hid,rpr				Statistical Analysis	(A) w1118 > UAS-hid,rpr	(B) SS21716 > w1118	(C) SS21716 > UAS-hid,rpr
Pref1	Pref 2	PI	Pref1	Pref 2	PI	Pref1	Pref 2	PI
-0.162162	-0.212121	-0.187142	-0.75	0.0277778	-0.361111	-0.964286	-0.258065	-0.611175
-0.583333	0.0967742	-0.24328	-0.5	-0.666667	-0.583333	-0.703704	-0.52	-0.611852		Number of values	25	15	15
-0.708333	-0.192308	-0.45	-0.535714	-0.677419	-0.606567	-0.4	-0.433333	-0.416667		Test for normal distribution: Shapiro-Wilk test
-0.351351	-0.333333	-0.34	-0.566667	-0.285714	-0.42619	-0.419355	-0.172414	-0.295884		W	0.9377	0.9459	0.9444
-0.684211	0	-0.34	-0.758621	0	-0.37931	-0.733333	-0.129032	-0.431183		P value	0.1308	0.4622	0.4403
-0.457143	-0.235294	-0.346218	-0.542857	-0.30303	-0.422944	-0.551724	-0.363636	-0.45768		Passed normality test (alpha=0.05)?	Yes	Yes	Yes
-0.457143	0.181818	-0.137662	-0.6875	-0.636364	-0.661932	-0.354839	-0.342857	-0.348848		P value summary	ns	ns	ns
-0.2	-0.277778	-0.238889	-0.16	-0.458333	-0.309167	-0.5625	-0.28125	-0.421875		One sample t test
-0.558824	-0.206897	-0.38286	-0.321429	-0.178571	-0.25	-0.314286	-0.0571429	-0.185714		Theoretical mean	0	0	0
-0.0571429	-0.147059	-0.102101	-0.758621	-0.0588235	-0.408722	-0.604651	-0.205128	-0.40489		Actual mean	-0.2092	-0.442	-0.3613
-0.4	-0.212121	-0.306061	-0.5	0.0322581	-0.233871	-0.516129	-0.138889	-0.327509		t, df	t=9.006, df=24	t=11.98, df=14	t=10.17, df=14
-0.382353	0.189189	-0.0965819	-0.806452	-0.176471	-0.491461	-0.393939	-0.0232558	-0.208598		P value (two tailed)	<0.0001	<0.0001	<0.0001
-0.4	0.228571	-0.0857143	-0.705882	-0.617647	-0.661765	-0.666667	0.34375	-0.161458		P value summary	****	****	****
-0.285714	-0.121212	-0.203463	-0.53125	-0.0588235	-0.295037	-0.290323	-0.3	-0.295161		Significant (alpha=0.05)?	Yes	Yes	Yes
-0.351351	0.025	-0.163176	-0.810811	-0.277778	-0.544294	-0.515152	0.0555556	-0.229798
-0.586207	-0.0333333	-0.30977								Ordinary one-way ANOVA
-0.764706	0.0645161	-0.350095								F	16.46
-0.514286	0.175	-0.169643								P value	<0.0001
-0.516129	0.28125	-0.11744								P value summary	****
-0.580645	0.129032	-0.225806								Significant diff. among means (P < 0.05)?	Yes
-0.190476	0.102564	-0.043956								R squared	0.3877
-0.236842	0.102564	-0.067139								Tukey's multiple comparisons test	Mean Diff.	95.00% CI of diff.	Below threshold?	Summary	Adjusted P Value
-0.514286	0.346154	-0.0840659								A vs B	0.2328	0.1306 to 0.3350	Yes	****	<0.0001
-0.392857	0.0967742	-0.148041								A vs C	0.1521	0.04993 to 0.2543	Yes	**	0.0021
-0.454545	0.30303	-0.0757576								B vs C	-0.08067	-0.1949 to 0.03360	No	ns	0.2136
Figure 4 - Figure Supplement 4F
w1118 > UAS-hid,rpr			SS01958 > w1118			SS01958 > UAS-hid,rpr				Statistical Analysis	(A) w1118 > UAS-hid,rpr	(B) SS01958 > w1118	(C) SS01958 > UAS-hid,rpr
Pref1	Pref 2	PI	Pref1	Pref 2	PI	Pref1	Pref 2	PI
-0.25	-0.1875	-0.21875	-0.65	-0.0277778	-0.338889	-0.0666667	-0.0277778	-0.0472222
-0.121212	0	-0.0606061	-0.326087	-0.121951	-0.224019	-0.172414	-0.392857	-0.282635		Number of values	20	15	15
-0.28125	0	-0.140625	-0.25	-0.0526316	-0.151316	-0.473684	-0.135135	-0.30441		Test for normal distribution: Shapiro-Wilk test
-0.444444	-0.0263158	-0.23538	-0.314286	-0.289474	-0.30188	-0.0540541	0.138889	0.0424174		W	0.9587	0.9165	0.9264
-0.176471	-0.333333	-0.254902	-0.135135	-0.263158	-0.199147	-0.129032	-0.294118	-0.211575		P value	0.5179	0.1703	0.241
-0.555556	-0.0277778	-0.291667	-0.645161	0.354839	-0.145161	-0.21875	0	-0.109375		Passed normality test (alpha=0.05)?	Yes	Yes	Yes
-0.361111	0.0769231	-0.142094	-0.71875	-0.0882353	-0.403493	-0.103448	0.03125	-0.0360991		P value summary	ns	ns	ns
-0.5	0.111111	-0.194444	-0.515152	-0.0645161	-0.289834	-0.514286	0	-0.257143		One sample t test
-0.428571	0.0285714	-0.2	-0.625	-0.151515	-0.388258	-0.382353	-0.342857	-0.362605		Theoretical mean	0	0	0
-0.457143	-0.157895	-0.307519	-0.612903	-0.0588235	-0.335863	-0.542857	-0.194444	-0.368651		Actual mean	-0.2455	-0.2927	-0.2393
-0.6	-0.125	-0.3625	-0.242424	-0.176471	-0.209447	-0.457143	0.272727	-0.0922078		t, df	t=10.65, df=19	t=9.012, df=14	t=6.028, df=14
-0.647059	-0.166667	-0.406863	-0.709677	-0.472222	-0.59095	-0.545455	-0.342857	-0.444156		P value (two tailed)	<0.0001	<0.0001	<0.0001
-0.5	-0.243243	-0.371622	-0.514286	0.0882353	-0.213025	-0.358974	-0.5	-0.429487		P value summary	****	****	****
-0.621622	-0.075	-0.348311	-0.257143	-0.0540541	-0.155598	-0.466667	-0.176471	-0.321569		Significant (alpha=0.05)?	Yes	Yes	Yes
-0.515152	0.0882353	-0.213458	-0.65	-0.230769	-0.440385	-0.405405	-0.333333	-0.369369
-0.212121	-0.147059	-0.17959								Ordinary one-way ANOVA
-0.823529	-0.0882353	-0.455882								F	0.8215
-0.27027	-0.0526316	-0.161451								P value	0.446
-0.30303	-0.105263	-0.204147								P value summary	ns
-0.205882	-0.133333	-0.169608								Significant diff. among means (P < 0.05)?	No
										R squared	0.03378
										Tukey's multiple comparisons test	Mean Diff.	95.00% CI of diff.	Below threshold?	Summary	Adjusted P Value
										A vs B	0.04717	-0.05757 to 0.1519	No	ns	0.525
										A vs C	-0.006167	-0.1109 to 0.09857	No	ns	0.9889
										B vs C	-0.05333	-0.1653 to 0.05863	No	ns	0.487
