# Supplementary material for: Four individually identified paired dopamine neurons signal taste punishment in larval Drosophila
Source: eLife. 2025 Jun 16;12:RP91387. doi: 10.7554/eLife.91387 (PMC12169853; doi:10.7554/eLife.91387)
Supplement: Figure 4—figure supplement 5—source data 1. [file elife-91387-fig4-figsupp5-data1.xlsx]

## Sheet: Figure 4-FigSuppl 5
Figure 4 - Figure Supplement 5A
Pref AM 1:250 vs EM				Statistical Analysis	(A) w1118 > UAS-hid,rpr	(B) MB054B > w1118	(C) MB054B > UAS-hid,rpr
w1118 > UAS-hid,rpr	MB054B > w1118	MB054B > UAS-hid,rpr
0.214286	0.0714286	0.366667
0.2	0.1	0.322581		Number of values	15	15	15
0.214286	0.285714	0.566667		Test for normal distribution: Shapiro-Wilk test
0.333333	0.1875	0.285714		W	0.9025	0.9458	0.9685
0.387097	0.733333	0.366667		P value	0.1039	0.4603	0.836
0.216216	-0.133333	0.4		Passed normality test (alpha=0.05)?	Yes	Yes	Yes
0.166667	0.571429	0.444444		P value summary	ns	ns	ns
0.233333	0.133333	0.310345		One sample t test
0.0322581	0.580645	0.714286		Theoretical mean	0	0	0
0.266667	0.375	0.344828		Actual mean	0.2333	0.286	0.4007
0.233333	0.1	0.586207		t, df	t=9.788, df=14	t=4.020, df=14	t=10.19, df=14
0.166667	0.233333	0.4		P value (two tailed)	<0.0001	0.0013	<0.0001
0.413793	-0.1	0.545455		P value summary	****	**	****
0.2	0.733333	0.121212		Significant (alpha=0.05)?	Yes	Yes	Yes
0.233333	0.419355	0.233333
				Ordinary one-way ANOVA
				F	3.061
				P value	0.0574
				P value summary	ns
				Significant diff. among means (P < 0.05)?	No
				R squared	0.1272
				Tukey's multiple comparisons test	Mean Diff.	95.00% CI of diff.	Below threshold?	Summary	Adjusted P Value
				A vs B	-0.05267	-0.2207 to 0.1154	No	ns	0.7284
				A vs C	-0.1673	-0.3354 to 0.0006853	No	ns	0.0511
				B vs C	-0.1147	-0.2827 to 0.05335	No	ns	0.2332
Figure 4 - Figure Supplement 5B
Pref BA undiluted vs EM				Statistical Analysis	(A) w1118 > UAS-hid,rpr	(B) MB054B > w1118	(C) MB054B > UAS-hid,rpr
w1118 > UAS-hid,rpr	MB054B > w1118	MB054B > UAS-hid,rpr
0.310345	-0.214286	-0.16129
-0.03125	0.0322581	0.3		Number of values	15	15	15
-0.137931	0.172414	0.205882		Test for normal distribution: Shapiro-Wilk test
0.16129	-0.241379	0.212121		W	0.9224	0.9481	0.9423
0.0333333	0.516129	0.366667		P value	0.2098	0.4944	0.4122
0.444444	0.378378	0.533333		Passed normality test (alpha=0.05)?	Yes	Yes	Yes
0.15625	-0.15625	0.633333		P value summary	ns	ns	ns
0.37931	0.275862	0.344828		One sample t test
-0.0606061	0.655172	-0.310345		Theoretical mean	0	0	0
0.366667	0.1	0.133333		Actual mean	0.2327	0.196	0.1973
0.625	0.933333	0.181818		t, df	t=3.699, df=14	t=2.222, df=14	t=3.059, df=14
0.428571	0.133333	0.166667		P value (two tailed)	0.0024	0.0433	0.0085
-0.0909091	0.266667	-0.138889		P value summary	**	*	**
0.433333	-0.241379	0.2		Significant (alpha=0.05)?	Yes	Yes	Yes
0.466667	0.322581	0.30303
				Ordinary one-way ANOVA
				F	0.08159
				P value	0.9218
				P value summary	ns
				Significant diff. among means (P < 0.05)?	No
				R squared	0.00387
				Tukey's multiple comparisons test	Mean Diff.	95.00% CI of diff.	Below threshold?	Summary	Adjusted P Value
				A vs B	0.03667	-0.2135 to 0.2868	No	ns	0.9326
				A vs C	0.03533	-0.2148 to 0.2855	No	ns	0.9372
				B vs C	-0.001333	-0.2515 to 0.2488	No	ns	>0.9999
Figure 4 - Figure Supplement 5C
Pref HA 1:100 vs EM				Statistical Analysis	(A) w1118 > UAS-hid,rpr	(B) MB054B > w1118	(C) MB054B > UAS-hid,rpr
w1118 > UAS-hid,rpr	MB054B > w1118	MB054B > UAS-hid,rpr
0.428571	0.433333	0.1875
0.0645161	0.0645161	0.4		Number of values	15	15	15
0.241379	0.709677	0.333333		Test for normal distribution: Shapiro-Wilk test
0.241379	0.375	0.0967742		W	0.9862	0.9445	0.9456
0.586207	-0.0714286	0.333333		P value	0.9955	0.4424	0.4573
-0.0333333	0.0967742	0.214286		Passed normality test (alpha=0.05)?	Yes	Yes	Yes
0.375	-0.16129	0.181818		P value summary	ns	ns	ns
0.4	0.185185	0.5		One sample t test
0.16129	-0.0769231	0.225806		Theoretical mean	0	0	0
0.28125	0.413793	0.6		Actual mean	0.2533	0.1847	0.2927
0.133333	0.0714286	0.0967742		t, df	t=6.176, df=14	t=3.041, df=14	t=7.478, df=14
0.305556	0.366667	0.37931		P value (two tailed)	<0.0001	0.0088	<0.0001
0.171429	0.09375	0.464286		P value summary	****	**	****
0.129032	0.0625	0.241379		Significant (alpha=0.05)?	Yes	Yes	Yes
0.3125	0.212121	0.137931
				Ordinary one-way ANOVA
				F	1.299
				P value	0.2836
				P value summary	ns
				Significant diff. among means (P < 0.05)?	No
				R squared	0.05825
				Tukey's multiple comparisons test	Mean Diff.	95.00% CI of diff.	Below threshold?	Summary	Adjusted P Value
				A vs B	0.06867	-0.09612 to 0.2335	No	ns	0.5733
				A vs C	-0.03933	-0.2041 to 0.1255	No	ns	0.8316
				B vs C	-0.108	-0.2728 to 0.05679	No	ns	0.2601
Figure 4 - Figure Supplement 5D
Pref BA 1:100 vs EM				Statistical Analysis	(A) w1118 > UAS-hid,rpr	(B) MB054B > w1118	(C) MB054B > UAS-hid,rpr
w1118 > UAS-hid,rpr	MB054B > w1118	MB054B > UAS-hid,rpr
0.0322581	0.344828	0.214286
-0.0322581	0.444444	0.0666667		Number of values	15	15	15
0.571429	0.037037	-0.0333333		Test for normal distribution: Shapiro-Wilk test
0.533333	0.206897	0.206897		W	0.9836	0.9315	0.9778
0.147059	0.357143	0.0740741		P value	0.9882	0.2876	0.9525
0.266667	0.205882	0.322581		Passed normality test (alpha=0.05)?	Yes	Yes	Yes
0.407407	0.172414	-0.137931		P value summary	ns	ns	ns
0.103448	0.34375	0.266667		One sample t test
0.366667	0.0689655	-0.037037		Theoretical mean	0	0	0
0.333333	0.0666667	0.28125		Actual mean	0.2693	0.2373	0.1287
0.206897	0.533333	0.548387		t, df	t=6.067, df=14	t=5.959, df=14	t=2.366, df=14
0.413793	0.393939	-0.0333333		P value (two tailed)	<0.0001	<0.0001	0.0329
0.28125	0.206897	-0.241379		P value summary	****	****	*
0.21875	0.117647	0.357143		Significant (alpha=0.05)?	Yes	Yes	Yes
0.1875	0.0571429	0.0666667
				Ordinary one-way ANOVA
				F	2.504
				P value	0.0939
				P value summary	ns
				Significant diff. among means (P < 0.05)?	No
				R squared	0.1065
				Tukey's multiple comparisons test	Mean Diff.	95.00% CI of diff.	Below threshold?	Summary	Adjusted P Value
				A vs B	0.032	-0.1281 to 0.1921	No	ns	0.8785
				A vs C	0.1407	-0.01944 to 0.3008	No	ns	0.095
				B vs C	0.1087	-0.05144 to 0.2688	No	ns	0.2368
Figure 4 - Figure Supplement 5E
Pref 1.5 M NaCl vs Pure Agarose				Statistical Analysis	(A) w1118 > UAS-hid,rpr	(B) MB054B > w1118	(C) MB054B > UAS-hid,rpr
w1118 > UAS-hid,rpr	MB054B > w1118	MB054B > UAS-hid,rpr
-0.7	-0.4	-0.63
-0.62	-0.52	-0.41		Number of values	15	15	15
-0.5	-0.47	-0.56		Test for normal distribution: Shapiro-Wilk test
-0.52	-0.46	-0.47		W	0.9466	0.9843	0.946
-0.48	-0.46	-0.55		P value	0.4731	0.9907	0.4641
-0.55	-0.58	-0.61		Passed normality test (alpha=0.05)?	Yes	Yes	Yes
-0.59	-0.67	-0.64		P value summary	ns	ns	ns
-0.33	-0.5	-0.66		One sample t test
-0.48	-0.29	-0.62		Theoretical mean	0	0	0
-0.33	-0.32	-0.64		Actual mean	-0.452	-0.4433	-0.5793
-0.27	-0.19	-0.42		t, df	t=12.16, df=14	t=13.58, df=14	t=23.97, df=14
-0.47	-0.59	-0.52		P value (two tailed)	<0.0001	<0.0001	<0.0001
-0.25	-0.48	-0.55		P value summary	****	****	****
-0.21	-0.39	-0.72		Significant (alpha=0.05)?	Yes	Yes	Yes
-0.48	-0.33	-0.69
				Ordinary one-way ANOVA
				F	5.737
				P value	0.0063
				P value summary	**
				Significant diff. among means (P < 0.05)?	Yes
				R squared	0.2146
				Tukey's multiple comparisons test	Mean Diff.	95.00% CI of diff.	Below threshold?	Summary	Adjusted P Value
				A vs B	-0.008667	-0.1179 to 0.1006	No	ns	0.9797
				A vs C	0.1273	0.01811 to 0.2366	Yes	*	0.019
				B vs C	0.136	0.02678 to 0.2452	Yes	*	0.0115
