# Supplementary material for: Four individually identified paired dopamine neurons signal taste punishment in larval Drosophila
Source: eLife. 2025 Jun 16;12:RP91387. doi: 10.7554/eLife.91387 (PMC12169853; doi:10.7554/eLife.91387)
Supplement: Figure 4—source data 1. [file elife-91387-fig4-data1.xlsx]

## Sheet: Figure 4
Figure 4A
w1118 > UAS-hid.rpr			MB054B > w1118			MB054B > UAS-hid.rpr				Statistical Analysis	(A) w1118 > UAS-hid.rpr	(B) MB054B > w1118	(C) MB054B > UAS-hid.rpr
Pref1	Pref 2	PI	Pref1	Pref 2	PI	Pref1	Pref 2	PI
-0.594595	0.212121	-0.191237	-0.411765	-0.162162	-0.286963	-0.526316	0.142857	-0.191729
-0.428571	-0.03125	-0.229911	-0.5	-0.105263	-0.302632	-0.485714	0.0285714	-0.228571		Number of values	20	20	20
-0.787879	0.135135	-0.326372	-0.703704	-0.571429	-0.637566	-0.583333	0.454545	-0.0643939		Test for normal distribution: Shapiro-Wilk test
-0.722222	-0.314286	-0.518254	-0.566667	-0.653846	-0.610256	-0.405405	-0.151515	-0.27846		W	0.9604	0.9052	0.9586
-0.204545	-0.2	-0.202273	-0.484848	-0.257143	-0.370996	-0.142857	0.241379	0.0492611		P value	0.5526	0.0516	0.5162
-0.484848	-0.269231	-0.37704	-0.606061	-0.09375	-0.349905	-0.366667	-0.1875	-0.277083		Passed normality test (alpha=0.05)?	Yes	Yes	Yes
-0.2	-0.243243	-0.221622	-0.615385	-0.423077	-0.519231	-0.62963	0.521739	-0.0539452		P value summary	ns	ns	ns
-0.76	-0.269231	-0.514615	-0.333333	-0.25	-0.291667	-0.514286	0.097561	-0.208362		One sample t test
-0.366667	-0.433333	-0.4	-0.771429	0.181818	-0.294805	-0.352941	0.162162	-0.0953895		Theoretical mean	0	0	0
-0.451613	-0.269231	-0.360422	-0.558824	-0.0555556	-0.30719	-0.393939	0.172414	-0.110763		Actual mean	-0.3275	-0.342	-0.1475
-0.515152	-0.222222	-0.368687	-0.633333	-0.0769231	-0.355128	-0.833333	0.257143	-0.288095		t. df	t=14.41. df=19	t=11.55. df=19	t=6.423. df=19
-0.25	-0.548387	-0.399194	-0.375	-0.333333	-0.354167	-0.2	0.0967742	-0.0516129		P value (two tailed)	<0.0001	<0.0001	<0.0001
-0.294118	-0.0294118	-0.161765	-0.482759	-0.259259	-0.371009	-0.448276	0.142857	-0.152709		P value summary	****	****	****
-0.6	0.0645161	-0.267742	-0.645161	-0.03125	-0.338206	-0.472222	0.0833333	-0.194444		Significant (alpha=0.05)?	Yes	Yes	Yes
-0.484848	-0.258065	-0.371457	-0.3125	0.129032	-0.0917339	-0.205128	-0.0909091	-0.148019
-0.515152	-0.193548	-0.35435	-0.6	-0.0344828	-0.317241	-0.214286	0.0285714	-0.0928571		Ordinary one-way ANOVA
-0.59375	0.0645161	-0.264617	-0.525	-0.16129	-0.343145	-0.571429	0.193548	-0.18894		F	18.35
-0.6	-0.25	-0.425	-0.625	0.314286	-0.155357	-0.625	0.0333333	-0.295833		P value	<0.0001
-0.567568	0.0434783	-0.262045	-0.361111	-0.46875	-0.414931	-0.114286	0.179487	0.0326007		P value summary	****
-0.580645	-0.0909091	-0.335777	-0.277778	-0.0833333	-0.180556	-0.517241	0.3	-0.108621		Significant diff. among means (P < 0.05)?	Yes
										R squared	0.3916
										Tukey's multiple comparisons test	Mean Diff.	95.00% CI of diff.	Below threshold?	Summary	Adjusted P Value
										A vs B	-0.0145	-0.1006 to 0.07159	No	ns	0.9136
										A vs C	0.18	0.09391 to 0.2661	Yes	****	<0.0001
										B vs C	0.1945	0.1084 to 0.2806	Yes	****	<0.0001
Figure 4B
w1118 > UAS-hid.rpr			MB065B > w1118			MB065B > UAS-hid.rpr				Statistical Analysis	(A) w1118 > UAS-hid.rpr	(B) MB065B > w1118	(C) MB065B > UAS-hid.rpr
Pref1	Pref 2	PI	Pref1	Pref 2	PI	Pref1	Pref 2	PI
-0.333333	0.0571429	-0.138095	-0.666667	0.176471	-0.245098	-0.586207	0.53125	-0.0274784
-0.647059	-0.411765	-0.529412	-0.6	0.176471	-0.211765	-0.633333	-0.0333333	-0.333333		Number of values	20	20	20
-0.571429	0.176471	-0.197479	-0.5625	-0.0294118	-0.295956	-0.09375	0.147059	0.0266544		Test for normal distribution: Shapiro-Wilk test
-0.34375	0.222222	-0.0607639	-0.105263	0.272727	0.0837321	-0.133333	0.205882	0.0362745		W	0.9713	0.9214	0.956
-0.30303	0.361111	0.0290404	-0.222222	0.138889	-0.0416667	-0.741935	0.454545	-0.143695		P value	0.7825	0.1052	0.4676
-0.285714	-0.0555556	-0.170635	-0.485714	0.181818	-0.151948	-0.461538	-0.03125	-0.246394		Passed normality test (alpha=0.05)?	Yes	Yes	Yes
-0.535714	-0.28125	-0.408482	-0.571429	0.0285714	-0.271429	-0.342105	0.25	-0.0460526		P value summary	ns	ns	ns
-0.514286	0.28125	-0.116518	-0.636364	0.0833333	-0.276515	-0.411765	-0.111111	-0.261438		One sample t test
-0.375	-0.103448	-0.239224	-0.612903	0.0909091	-0.260997	-0.525	-0.157895	-0.341447		Theoretical mean	0	0	0
-0.823529	-0.125	-0.474265	-0.333333	-0.212121	-0.272727	-0.615385	-0.186047	-0.400716		Actual mean	-0.246	-0.207	-0.187
-0.837838	0.121212	-0.358313	-0.612903	-0.56	-0.586452	-0.818182	0.45	-0.184091		t. df	t=7.121. df=19	t=6.872. df=19	t=4.616. df=19
-0.714286	0.257143	-0.228571	-0.28125	-0.0512821	-0.166266	-0.352941	-0.025641	-0.189291		P value (two tailed)	<0.0001	<0.0001	0.0002
-0.615385	0.459459	-0.0779626	-0.5625	0.484848	-0.0388258	-0.228571	0.0697674	-0.079402		P value summary	****	****	***
-0.472222	-0.0263158	-0.249269	-0.555556	-0.0967742	-0.326165	0	-0.0277778	-0.0138889		Significant (alpha=0.05)?	Yes	Yes	Yes
-0.771429	0.0857143	-0.342857	-0.678571	0.2	-0.239286	-0.463415	-0.416667	-0.440041
-0.625	0.45	-0.0875	-0.3	0.0384615	-0.130769	-0.621622	-0.459459	-0.540541		Ordinary one-way ANOVA
-0.459459	-0.0512821	-0.255371	-0.205882	-0.193548	-0.199715	-0.548387	-0.305556	-0.426971		F	0.7218
-0.75	-0.025	-0.3875	-0.444444	0.171429	-0.136508	-0.4375	0.09375	-0.171875		P value	0.4903
-0.486486	0.194444	-0.146021	-0.16129	-0.193548	-0.177419	-0.277778	0.171429	-0.0531746		P value summary	ns
-0.846154	-0.0689655	-0.45756	-0.558824	0.21875	-0.170037	-0.0882353	0.257143	0.0844538		Significant diff. among means (P < 0.05)?	No
										R squared	0.0247
										Tukey's multiple comparisons test	Mean Diff.	95.00% CI of diff.	Below threshold?	Summary	Adjusted P Value
										A vs B	-0.039	-0.1592 to 0.08119	No	ns	0.7162
										A vs C	-0.059	-0.1792 to 0.06119	No	ns	0.4691
										B vs C	-0.02	-0.1402 to 0.1002	No	ns	0.9155
Figure 4C
w1118 > UAS-hid.rpr			SS01702 > w1118			SS01702 > UAS-hid.rpr				Statistical Analysis	(A) w1118 > UAS-hid.rpr	(B) SS01702 > w1118	(C) SS01702 > UAS-hid.rpr
Pref1	Pref 2	PI	Pref1	Pref 2	PI	Pref1	Pref 2	PI
-0.333333	0.0571429	-0.138095	-0.787879	-0.517241	-0.65256	-0.47619	0.108108	-0.184041
-0.647059	-0.411765	-0.529412	-0.766667	-0.4	-0.583333	-0.794118	-0.179487	-0.486802		Number of values	20	15	15
-0.571429	0.176471	-0.197479	-0.433333	-0.178571	-0.305952	-0.6	-0.5625	-0.58125		Test for normal distribution: Shapiro-Wilk test
-0.34375	0.222222	-0.0607639	-0.542857	-0.6	-0.571429	-0.46875	0	-0.234375		W	0.9488	0.9658	0.9379
-0.285714	-0.0555556	-0.170635	-0.275862	-0.266667	-0.271264	-0.75	-0.28125	-0.515625		P value	0.3494	0.7925	0.3573
-0.535714	-0.28125	-0.408482	-0.392857	-0.375	-0.383929	-0.548387	-0.612903	-0.580645		Passed normality test (alpha=0.05)?	Yes	Yes	Yes
-0.514286	0.28125	-0.116518	-0.461538	-0.208333	-0.334936	-0.264706	-0.4	-0.332353		P value summary	ns	ns	ns
-0.375	-0.103448	-0.239224	-0.206897	0	-0.103448	-0.333333	-0.0344828	-0.183908		One sample t test
-0.823529	-0.125	-0.474265	-0.517241	-0.529412	-0.523327	-0.454545	-0.361111	-0.407828		Theoretical mean	0	0	0
-0.837838	0.121212	-0.358313	-0.586207	-0.0606061	-0.323406	-0.714286	0.0625	-0.325893		Actual mean	-0.278	-0.3973	-0.3827
-0.714286	0.257143	-0.228571	-0.638889	-0.0909091	-0.364899	-0.175	-0.025	-0.1		t. df	t=7.747. df=19	t=10.89. df=14	t=9.585. df=14
-0.615385	0.459459	-0.0779626	-0.538462	-0.347826	-0.443144	-0.46875	-0.382353	-0.425551		P value (two tailed)	<0.0001	<0.0001	<0.0001
-0.472222	-0.0263158	-0.249269	-0.34375	-0.257143	-0.300446	-0.666667	-0.40625	-0.536458		P value summary	****	****	****
-0.771429	0.0857143	-0.342857	-0.8125	-0.0625	-0.4375	-0.606061	-0.125	-0.36553		Significant (alpha=0.05)?	Yes	Yes	Yes
-0.625	0.45	-0.0875	-0.606061	-0.166667	-0.386364	-0.485714	-0.444444	-0.465079
-0.459459	-0.0512821	-0.255371								Ordinary one-way ANOVA
-0.75	-0.025	-0.3875								F	3.239
-0.486486	0.194444	-0.146021								P value	0.0481
-0.846154	-0.0689655	-0.45756								P value summary	*
-0.606061	-0.619048	-0.612554								Significant diff. among means (P < 0.05)?	Yes
										R squared	0.1211
										Tukey's multiple comparisons test	Mean Diff.	95.00% CI of diff.	Below threshold?	Summary	Adjusted P Value
										A vs B	0.1193	-0.007341 to 0.2460	No	ns	0.0686
										A vs C	0.1047	-0.02201 to 0.2313	No	ns	0.1235
										B vs C	-0.01467	-0.1501 to 0.1208	No	ns	0.9629
Figure 4D
w1118 > UAS-hid.rpr			MB054B > w1118			MB054B > UAS-hid.rpr				Statistical Analysis	(A) w1118 > UAS-hid.rpr	(B) MB054B > w1118	(C) MB054B > UAS-hid.rpr
Pref1	Pref 2	PI	Pref1	Pref 2	PI	Pref1	Pref 2	PI
-0.25	-0.1875	-0.21875	-0.444444	-0.0263158	-0.23538	-0.257143	0.289474	0.0161654
-0.121212	0	-0.0606061	-0.34375	0.121212	-0.111269	-0.763158	0.0769231	-0.343117		Number of values	20	20	20
-0.28125	0	-0.140625	-0.542857	0.0571429	-0.242857	-0.27027	-0.268293	-0.269281		Test for normal distribution: Shapiro-Wilk test
-0.444444	-0.0263158	-0.23538	-0.514286	-0.305556	-0.409921	0.0606061	-0.28125	-0.110322		W	0.9587	0.9838	0.9744
-0.176471	-0.333333	-0.254902	-0.580645	-0.3125	-0.446573	-0.333333	0.0967742	-0.11828		P value	0.5179	0.9733	0.8434
-0.555556	-0.0277778	-0.291667	-0.4375	0.0833333	-0.177083	-0.315789	0	-0.157895		Passed normality test (alpha=0.05)?	Yes	Yes	Yes
-0.361111	0.0769231	-0.142094	-0.0357143	-0.466667	-0.25119	-0.617647	0	-0.308824		P value summary	ns	ns	ns
-0.5	0.111111	-0.194444	-0.529412	-0.194444	-0.361928	-0.647059	0.205882	-0.220588		One sample t test
-0.428571	0.0285714	-0.2	-0.333333	-0.212121	-0.272727	-0.433333	-0.176471	-0.304902		Theoretical mean	0	0	0
-0.457143	-0.157895	-0.307519	-0.655172	-0.185185	-0.420179	-0.647059	-0.108108	-0.377583		Actual mean	-0.2455	-0.2945	-0.248
-0.6	-0.125	-0.3625	-0.285714	-0.117647	-0.201681	-0.454545	-0.114286	-0.284416		t. df	t=10.65. df=19	t=14.40. df=19	t=8.687. df=19
-0.647059	-0.166667	-0.406863	-0.452381	-0.129032	-0.290707	-0.657143	-0.0810811	-0.369112		P value (two tailed)	<0.0001	<0.0001	<0.0001
-0.5	-0.243243	-0.371622	-0.5	-0.307692	-0.403846	-0.1875	-0.0882353	-0.137868		P value summary	****	****	****
-0.621622	-0.075	-0.348311	-0.321429	-0.225806	-0.273618	-0.242424	-0.0588235	-0.150624		Significant (alpha=0.05)?	Yes	Yes	Yes
-0.515152	0.0882353	-0.213458	-0.387097	-0.241379	-0.314238	-0.470588	-0.6	-0.535294
-0.212121	-0.147059	-0.17959	-0.62069	0	-0.310345	-0.5	-0.257143	-0.378571		Ordinary one-way ANOVA
-0.823529	-0.0882353	-0.455882	-0.5	-0.189189	-0.344595	-0.333333	0.030303	-0.151515		F	1.295
-0.27027	-0.0526316	-0.161451	-0.361111	-0.342105	-0.351608	-0.411765	-0.264706	-0.338235		P value	0.2819
-0.30303	-0.105263	-0.204147	-0.484848	-0.181818	-0.333333	-0.4375	0	-0.21875		P value summary	ns
-0.205882	-0.133333	-0.169608	-0.4	0.0857143	-0.157143	-0.225806	-0.181818	-0.203812		Significant diff. among means (P < 0.05)?	No
										R squared	0.04346
										Tukey's multiple comparisons test	Mean Diff.	95.00% CI of diff.	Below threshold?	Summary	Adjusted P Value
										A vs B	0.049	-0.03353 to 0.1315	No	ns	0.3332
										A vs C	0.0025	-0.08003 to 0.08503	No	ns	0.9971
										B vs C	-0.0465	-0.1290 to 0.03603	No	ns	0.3708
Figure 4E
w1118 > UAS-hid.rpr			MB065B > w1118			MB065B > UAS-hid.rpr				Statistical Analysis	(A) w1118 > UAS-hid.rpr	(B) MB054B > w1118	(C) MB054B > UAS-hid.rpr
Pref1	Pref 2	PI	Pref1	Pref 2	PI	Pref1	Pref 2	PI
-0.162162	-0.212121	-0.187142	-0.7	0	-0.35	-0.675	-0.105263	-0.390132
-0.583333	0.0967742	-0.24328	-0.457143	-0.025	-0.241071	-0.517241	0.418605	-0.0493184		Number of values	25	20	20
-0.708333	-0.192308	-0.45	-0.545455	-0.212121	-0.378788	-0.147059	-0.151515	-0.149287		Test for normal distribution: Shapiro-Wilk test
-0.351351	-0.333333	-0.34	-0.8	0.129032	-0.335484	-0.315789	-0.294118	-0.304954		W	0.9377	0.9579	0.9762
-0.684211	0	-0.34	-0.459459	0.0294118	-0.215024	-0.475	-0.111111	-0.293056		P value	0.1308	0.5029	0.8757
-0.457143	-0.235294	-0.346218	-0.692308	-0.128205	-0.410256	-0.625	-0.147059	-0.386029		Passed normality test (alpha=0.05)?	Yes	Yes	Yes
-0.457143	0.181818	-0.137662	-0.45	-0.170732	-0.310366	-0.352941	0.0294118	-0.161765		P value summary	ns	ns	ns
-0.2	-0.277778	-0.238889	-0.4375	-0.193548	-0.315524	-0.352941	-0.125	-0.238971		One sample t test
-0.558824	-0.206897	-0.38286	-0.225806	-0.0285714	-0.127189	-0.294118	-0.114286	-0.204202		Theoretical mean	0	0	0
-0.0571429	-0.147059	-0.102101	-0.387097	0.305556	-0.0407706	-0.375	-0.0645161	-0.219758		Actual mean	-0.2092	-0.29	-0.232
-0.4	-0.212121	-0.306061	-0.545455	0.133333	-0.206061	-0.666667	-0.352941	-0.509804		t. df	t=9.006. df=24	t=9.120. df=19	t=8.533. df=19
-0.382353	0.189189	-0.0965819	-0.6	-0.129032	-0.364516	-0.266667	0.178571	-0.0440476		P value (two tailed)	<0.0001	<0.0001	<0.0001
-0.4	0.228571	-0.0857143	-0.62069	0.230769	-0.19496	-0.472222	-0.228571	-0.350397		P value summary	****	****	****
-0.285714	-0.121212	-0.203463	-0.517241	-0.44	-0.478621	-0.421053	-0.0857143	-0.253383		Significant (alpha=0.05)?	Yes	Yes	Yes
-0.351351	0.025	-0.163176	-0.484848	-0.0526316	-0.26874	-0.16129	-0.0322581	-0.0967742
-0.586207	-0.0333333	-0.30977	-0.485714	-0.171429	-0.328571	-0.21875	-0.3125	-0.265625		Ordinary one-way ANOVA
-0.764706	0.0645161	-0.350095	-0.53125	0.0857143	-0.222768	-0.444444	0.16129	-0.141577		F	2.349
-0.514286	0.175	-0.169643	-0.764706	0.178571	-0.293067	-0.378378	-0.212121	-0.29525		P value	0.1039
-0.516129	0.28125	-0.11744	-0.821429	-0.5	-0.660714	-0.529412	0.181818	-0.173797		P value summary	ns
-0.580645	0.129032	-0.225806	-0.3125	0.212121	-0.0501894	-0.419355	0.181818	-0.118768		Significant diff. among means (P < 0.05)?	No
-0.190476	0.102564	-0.043956								R squared	0.07043
-0.236842	0.102564	-0.067139								Tukey's multiple comparisons test	Mean Diff.	95.00% CI of diff.	Below threshold?	Summary	Adjusted P Value
-0.514286	0.346154	-0.0840659								A vs B	0.0808	-0.01018 to 0.1718	No	ns	0.0915
-0.392857	0.0967742	-0.148041								A vs C	0.0228	-0.06818 to 0.1138	No	ns	0.8197
-0.454545	0.30303	-0.0757576								B vs C	-0.058	-0.1539 to 0.03790	No	ns	0.3209
Figure 4F
w1118 > UAS-hid.rpr			SS01702 > w1118			SS01702 > UAS-hid.rpr				Statistical Analysis	(A) w1118 > UAS-hid.rpr	(B) SS01702 > w1118	(C) SS01702 > UAS-hid.rpr
Pref1	Pref 2	PI	Pref1	Pref 2	PI	Pref1	Pref 2	PI
-0.162162	-0.212121	-0.187142	-0.27027	-0.294118	-0.282194	-0.628571	-0.333333	-0.480952
-0.583333	0.0967742	-0.24328	-0.818182	-0.545455	-0.681818	-0.525	-0.0294118	-0.277206		Number of values	20	15	15
-0.708333	-0.192308	-0.45	-0.771429	-0.529412	-0.65042	-0.552632	-0.717949	-0.63529		Test for normal distribution: Shapiro-Wilk test
-0.351351	-0.333333	-0.34	-0.594595	-0.333333	-0.463964	-0.45	-0.416667	-0.433333		W	0.9377	0.9297	0.9431
-0.684211	0	-0.34	-0.813953	-0.411765	-0.612859	-0.527778	-0.277778	-0.402778		P value	0.1308	0.2701	0.4227
-0.457143	-0.235294	-0.346218	-0.28125	-0.657143	-0.469196	-0.513514	-0.2	-0.356757		Passed normality test (alpha=0.05)?	Yes	Yes	Yes
-0.457143	0.181818	-0.137662	-0.764706	-0.210526	-0.487616	-0.931034	-0.3125	-0.621767		P value summary	ns	ns	ns
-0.2	-0.277778	-0.238889	-0.757576	-0.514286	-0.635931	-0.741935	-0.387097	-0.564516		One sample t test
-0.558824	-0.206897	-0.38286	-0.558824	-0.1	-0.329412	-0.793103	-0.28125	-0.537177		Theoretical mean	0	0	0
-0.0571429	-0.147059	-0.102101	-0.75	-0.410256	-0.580128	-0.233333	-0.378378	-0.305856		Actual mean	-0.2092	-0.4613	-0.438
-0.4	-0.212121	-0.306061	-0.394737	-0.108108	-0.251422	-0.545455	-0.3	-0.422727		t. df	t=9.006. df=24	t=12.02. df=14	t=15.26. df=14
-0.382353	0.189189	-0.0965819	-0.758621	-0.193548	-0.476085	-0.323529	-0.515152	-0.41934		P value (two tailed)	<0.0001	<0.0001	<0.0001
-0.4	0.228571	-0.0857143	-0.514286	-0.307692	-0.410989	-0.333333	-0.257143	-0.295238		P value summary	****	****	****
-0.285714	-0.121212	-0.203463	-0.5	0	-0.25	-0.567568	-0.290323	-0.428945		Significant (alpha=0.05)?	Yes	Yes	Yes
-0.351351	0.025	-0.163176	-0.40625	-0.28125	-0.34375	-0.684211	-0.0810811	-0.382646
-0.586207	-0.0333333	-0.30977								Ordinary one-way ANOVA
-0.764706	0.0645161	-0.350095								F	25.55
-0.514286	0.175	-0.169643								P value	<0.0001
-0.516129	0.28125	-0.11744								P value summary	****
-0.580645	0.129032	-0.225806								Significant diff. among means (P < 0.05)?	Yes
-0.190476	0.102564	-0.043956								R squared	0.4957
-0.236842	0.102564	-0.067139								Tukey's multiple comparisons test	Mean Diff.	95.00% CI of diff.	Below threshold?	Summary	Adjusted P Value
-0.514286	0.346154	-0.0840659								A vs B	0.2521	0.1540 to 0.3503	Yes	****	<0.0001
-0.392857	0.0967742	-0.148041								A vs C	0.2288	0.1307 to 0.3269	Yes	****	<0.0001
-0.454545	0.30303	-0.0757576								B vs C	-0.02333	-0.1330 to 0.08637	No	ns	0.8653
Figure 4G
w1118 > UAS-hid.rpr			MB054B > w1118			MB054B > UAS-hid.rpr				Statistical Analysis	(A) w1118 > UAS-hid.rpr	(B) MB054B > w1118	(C) MB054B > UAS-hid.rpr
Pref1	Pref 2	PI	Pref1	Pref 2	PI	Pref1	Pref 2	PI
-0.678571	-0.645161	-0.661866	-0.275862	-0.482759	-0.37931	-0.433333	-0.0689655	-0.251149
-0.0606061	-0.28125	-0.170928	-0.275862	-0.275862	-0.275862	-0.551724	-0.333333	-0.442529		Number of values	15	15	15
-0.15625	-0.387097	-0.271673	-0.333333	-0.484848	-0.409091	-0.151515	0.0588235	-0.0463458		Test for normal distribution: Shapiro-Wilk test
-0.166667	-0.258065	-0.212366	-0.204545	-0.34375	-0.274148	-0.0285714	0.413793	0.192611		W	0.8679	0.9341	0.9773
-0.171429	-0.322581	-0.247005	-0.194444	-0.333333	-0.263889	-0.222222	0.0333333	-0.0944444		P value	0.0315	0.3142	0.9478
-0.0322581	-0.387097	-0.209677	-0.121212	-0.540541	-0.330876	-0.166667	-0.0555556	-0.111111		Passed normality test (alpha=0.05)?	No	Yes	Yes
-0.228571	-0.189189	-0.20888	-0.527778	-0.513514	-0.520646	-0.483871	-0.233333	-0.358602		P value summary	*	ns	ns
-0.166667	-0.512195	-0.339431	-0.147059	-0.189189	-0.168124	-0.4375	-0.310345	-0.373922		Wilcoxon Signed Rank Test
-0.647059	-0.290323	-0.468691	-0.272727	-0.307692	-0.29021	-0.0666667	-0.375	-0.220833		Theoretical median	0	0	0
-0.0322581	-0.59375	-0.313004	-0.181818	-0.382353	-0.282086	0.107143	-0.0967742	0.00518433		Actual median	-0.31	-0.33	-0.13
-0.774194	-0.785714	-0.779954	-0.189189	-0.666667	-0.427928	-0.35	0.0833333	-0.133333		Sum of signed ranks (W)	-120	-120	-89
-0.484848	-0.482759	-0.483804	-0.366667	-0.645161	-0.505914	0.0555556	-0.0571429	-0.000793651		Sum of positive ranks	0	0	8
-0.1875	-0.333333	-0.260417	-0.628571	-0.129032	-0.378802	-0.484848	-0.0645161	-0.274682		Sum of negative ranks	-120	-120	-97
-0.103448	-0.566667	-0.335057	-0.212121	-0.275862	-0.243992	-0.25	-0.2	-0.225		P value (two tailed)	<0.0001	<0.0001	0.0031
-0.46875	-0.774194	-0.621472	-0.512195	-0.5	-0.506098	-0.454545	0.322581	-0.0659824		Exact or estimate?	Exact	Exact	Exact
										P value summary	****	****	**
										Significant (alpha=0.05)?	Yes	Yes	Yes
										Kruskal-Wallis test
										P value	0.003
										Exact or approximate P value?	Approximate
										P value summary	**
										Do the medians vary signif. (P < 0.05)?	Yes
										Number of groups	3
										Kruskal-Wallis statistic	11.65
										Dunn's multiple comparison test	Mean rank diff.	Significant?	Summary	Adjusted P Value
										A vs B	2.1	No	ns	>0.9999
										A vs C	-13	Yes	*	0.0201
										B vs C	-15.1	Yes	**	0.0049
Figure 4H
w1118 > UAS-hid.rpr			MB054B > w1118			MB054B > UAS-hid.rpr				Statistical Analysis	(A) w1118 > UAS-hid.rpr	(B) MB054B > w1118	(C) MB054B > UAS-hid.rpr
Pref1	Pref 2	PI	Pref1	Pref 2	PI	Pref1	Pref 2	PI
-0.375	-0.633333	-0.504167	-0.566667	-0.606061	-0.586364	-0.575758	0.09375	-0.241004
-0.393939	-0.342857	-0.368398	-0.441176	-0.393939	-0.417558	-0.735294	0.0882353	-0.323529		Number of values	15	15	15
-0.233333	-0.147059	-0.190196	-0.222222	-0.612903	-0.417563	-0.483871	-0.09375	-0.28881		Test for normal distribution: Shapiro-Wilk test
-0.3	-0.724138	-0.512069	-0.321429	-0.424242	-0.372835	-0.393939	-0.558824	-0.476381		W	0.9577	0.9215	0.9606
-0.225806	-0.3	-0.262903	-0.459459	-0.309524	-0.384492	-0.09375	-0.3	-0.196875		P value	0.6523	0.2031	0.7024
-0.25	-0.272727	-0.261364	-0.0540541	-0.333333	-0.193694	-0.575758	-0.108108	-0.341933		Passed normality test (alpha=0.05)?	Yes	Yes	Yes
-0.107143	-0.242424	-0.174784	-0.322581	-0.0294118	-0.175996	-0.428571	-0.129032	-0.278802		P value summary	ns	ns	ns
-0.03125	-0.0555556	-0.0434028	-0.235294	-0.166667	-0.20098	-0.272727	-0.09375	-0.183239		One sample t test
-0.25	0.125	-0.0625	-0.4	-0.131579	-0.265789	-0.285714	0.0625	-0.111607		Theoretical mean	0	0	0
-0.5	-0.242424	-0.371212	-0.487179	-0.3	-0.39359	-0.580645	-0.272727	-0.426686		Actual mean	-0.29	-0.33	-0.2913
-0.341463	-0.175	-0.258232	-0.25	-0.0571429	-0.153571	-0.411765	-0.243243	-0.327504		t. df	t=8.106. df=14	t=9.393. df=14	t=10.72. df=14
-0.461538	-0.342857	-0.402198	-0.548387	-0.551724	-0.550056	-0.388889	-0.529412	-0.45915		P value (two tailed)	<0.0001	<0.0001	<0.0001
-0.413793	-0.206897	-0.310345	-0.483871	-0.285714	-0.384793	-0.28125	-0.166667	-0.223958		P value summary	****	****	****
-0.37931	-0.16129	-0.2703	-0.315789	-0.0882353	-0.202012	-0.363636	-0.166667	-0.265152		Significant (alpha=0.05)?	Yes	Yes	Yes
-0.428571	-0.333333	-0.380952	-0.529412	0	-0.264706	-0.285714	-0.153846	-0.21978
										Ordinary one-way ANOVA
										F	0.4761
										P value	0.6245
										P value summary	ns
										Significant diff. among means (P < 0.05)?	No
										R squared	0.02217
										Tukey's multiple comparisons test	Mean Diff.	95.00% CI of diff.	Below threshold?	Summary	Adjusted P Value
										A vs B	0.04	-0.07313 to 0.1531	No	ns	0.6688
										A vs C	0.001333	-0.1118 to 0.1145	No	ns	0.9995
										B vs C	-0.03867	-0.1518 to 0.07446	No	ns	0.6864
Figure 4I
w1118 > UAS-hid.rpr			MB054B > w1118			MB054B > UAS-hid.rpr				Statistical Analysis	(A) w1118 > UAS-hid.rpr	(B) MB054B > w1118	(C) MB054B > UAS-hid.rpr
Pref1	Pref 2	PI	Pref1	Pref 2	PI	Pref1	Pref 2	PI
-0.1	0.28125	0.090625	0.433333	0.419355	0.426344	0.2	0.689655	0.444828
0.242424	0.09375	0.168087	0.0714286	0.517241	0.294335	0.28125	0.806452	0.543851		Number of values	15	15	15
0.105263	0.257143	0.181203	-0.0666667	0.206897	0.0701149	0.131579	0.34375	0.237664		Test for normal distribution: Shapiro-Wilk test
0.53125	0.333333	0.432292	-0.030303	-0.0625	-0.0464015	0.151515	0.787879	0.469697		W	0.9286	0.8499	0.9839
0.142857	0.290323	0.21659	0.2	0.454545	0.327273	-0.428571	0.657143	0.114286		P value	0.2603	0.0173	0.9895
0.517241	0.580645	0.548943	0.142857	0.727273	0.435065	0.0588235	0.5	0.279412		Passed normality test (alpha=0.05)?	Yes	No	Yes
0.451613	0.848485	0.650049	0.580645	0.5	0.540323	-0.233333	0.666667	0.216667		P value summary	ns	*	ns
0.0909091	0.125	0.107955	0.266667	0.482759	0.374713	0	0.592593	0.296296		Wilcoxon Signed Rank Test
-0.294118	0.558824	0.132353	0.178571	0.571429	0.375	-0.2	0.931034	0.365517		Theoretical median	0	0	0
0.257143	0.586207	0.421675	0.482759	0.5	0.491379	0.393939	0.30303	0.348485		Actual median	0.23	0.38	0.39
0.363636	0.290323	0.326979	0.137931	0.774194	0.456062	0.129032	0.642857	0.385945		Sum of signed ranks (W)	120	110	120
-0.0882353	0.903226	0.407495	0.16129	0.882353	0.521822	0.225806	0.733333	0.47957		Sum of positive ranks	120	115	120
0.25	0.65625	0.453125	0.1875	0.676471	0.431985	0.466667	0.7	0.583333		Sum of negative ranks	0	-5	0
0.1875	0.275862	0.231681	-0.592593	0.08	-0.256296	0.0689655	0.709677	0.389321		P value (two tailed)	<0.0001	0.0006	<0.0001
0.266667	-0.129032	0.0688172	0	0.25	0.125	0.46875	0.758621	0.613685		Exact or estimate?	Exact	Exact	Exact
										P value summary	****	***	****
										Significant (alpha=0.05)?	Yes	Yes	Yes
										Kruskal-Wallis test
										P value	0.3872
										Exact or approximate P value?	Approximate
										P value summary	ns
										Do the medians vary signif. (P < 0.05)?	No			Summary	Adjusted P Value
										Number of groups	3			ns	0.6688
										Kruskal-Wallis statistic	1.898			ns	0.9995
										Dunn's multiple comparison test	Mean rank diff.	Significant?	Summary	ns	0.6864
										A vs B	-3.1	No	ns	>0.9999
										A vs C	-6.6	No	ns	0.5057
										B vs C	-3.5	No	ns	>0.9999
Figure 4J
w1118 > UAS-hid.rpr			MB054B > w1118			MB054B > UAS-hid.rpr				Statistical Analysis	(A) w1118 > UAS-hid.rpr	(B) MB054B > w1118	(C) MB054B > UAS-hid.rpr
Pref1	Pref 2	PI	Pref1	Pref 2	PI	Pref1	Pref 2	PI
0.137931	-0.428571	-0.14532	-0.419355	-0.0967742	-0.258065	-0.366667	-0.638889	-0.502778
-0.235294	-0.484848	-0.360071	-0.606061	-0.709677	-0.657869	-0.233333	-0.294118	-0.263725		Number of values	15	15	15
-0.666667	-0.333333	-0.5	-0.21875	-0.5	-0.359375	-0.461538	-0.225806	-0.343672		Test for normal distribution: Shapiro-Wilk test
-0.392857	-0.46875	-0.430804	-0.342105	-0.714286	-0.528195	-0.354839	-0.322581	-0.33871		W	0.9466	0.9813	0.9636
-0.189189	-0.5	-0.344595	-0.214286	-0.821429	-0.517857	-0.75	-0.542857	-0.646429		P value	0.473	0.9776	0.755
-0.210526	-0.55	-0.380263	-0.485714	-0.5625	-0.524107	-0.40625	-0.358974	-0.382612		Passed normality test (alpha=0.05)?	Yes	Yes	Yes
-0.40625	-0.631579	-0.518914	-0.352941	-0.411765	-0.382353	-0.515152	-0.242424	-0.378788		P value summary	ns	ns	ns
-0.171429	-0.5	-0.335714	-0.236842	-0.435897	-0.33637	-0.421053	-0.405405	-0.413229		One sample t test
-0.0714286	-0.37931	-0.225369	-0.135135	-0.75	-0.442568	-0.59375	-0.558824	-0.576287		Theoretical mean	0	0	0
0	-0.451613	-0.225806	-0.305556	-0.571429	-0.438492	-0.277778	-0.3	-0.288889		Actual mean	-0.3573	-0.424	-0.418
-0.5	-0.290323	-0.395161	-0.342857	-0.825	-0.583929	-0.333333	-0.5	-0.416667		t. df	t=12.42. df=14	t=13.43. df=14	t=14.59. df=14
-0.314286	-0.540541	-0.427413	-0.107143	-0.285714	-0.196429	-0.515152	-0.5	-0.507576		P value (two tailed)	<0.0001	<0.0001	<0.0001
-0.236842	-0.515152	-0.375997	-0.176471	-0.605263	-0.390867	-0.25	-0.325581	-0.287791		P value summary	****	****	****
-0.542857	-0.4	-0.471429	-0.171429	-0.631579	-0.401504	-0.454545	-0.5	-0.477273		Significant (alpha=0.05)?	Yes	Yes	Yes
-0.0882353	-0.307692	-0.197964	-0.238095	-0.451613	-0.344854	-0.514286	-0.371429	-0.442857
										Ordinary one-way ANOVA
										F	1.543
										P value	0.2256
										P value summary	ns
										Significant diff. among means (P < 0.05)?	No
										R squared	0.06845
										Tukey's multiple comparisons test	Mean Diff.	95.00% CI of diff.	Significant?	Summary	Adjusted P Value
										A vs B	0.06667	-0.03534 to 0.1687	No	ns	0.262
										A vs C	0.06067	-0.04134 to 0.1627	No	ns	0.3276
										B vs C	-0.006	-0.1080 to 0.09601	No	ns	0.9888
Figure 4K
w1118 > UAS-hid.rpr			MB054B > w1118			MB054B > UAS-hid.rpr				Statistical Analysis	(A) w1118 > UAS-hid.rpr	(B) MB054B > w1118	(C) MB054B > UAS-hid.rpr
Pref1	Pref 2	PI	Pref1	Pref 2	PI	Pref1	Pref 2	PI
-0.482759	-0.212121	-0.34744	-0.128205	-0.333333	-0.230769	-0.363636	0.0512821	-0.156177
-0.59375	-0.692308	-0.643029	-0.432432	-0.444444	-0.438438	-0.594595	0.0588235	-0.267886		Number of values	15	15	15
-0.341463	-0.333333	-0.337398	-0.461538	-0.142857	-0.302198	-0.146341	-0.404255	-0.275298		Test for normal distribution: Shapiro-Wilk test
-0.540541	-0.264706	-0.402623	-0.0810811	-0.487805	-0.284443	-0.5	-0.114286	-0.307143		W	0.9515	0.9593	0.8841
-0.692308	-0.45	-0.571154	-0.483871	-0.297297	-0.390584	-0.575758	0.0444444	-0.265657		P value	0.5478	0.6796	0.0546
-0.0697674	-0.758621	-0.414194	-0.558824	-0.0243902	-0.291607	-0.763158	-0.125	-0.444079		Passed normality test (alpha=0.05)?	Yes	Yes	Yes
-0.342857	-0.424242	-0.38355	-0.5625	-0.5	-0.53125	-0.105263	0.135135	0.014936		P value summary	ns	ns	ns
-0.5	-0.244444	-0.372222	-0.348837	-0.65	-0.499419	-0.193548	-0.555556	-0.374552		One sample t test
-0.325	-0.444444	-0.384722	-0.355556	-0.575	-0.465278	-0.5	-0.181818	-0.340909		Theoretical mean	0	0	0
-0.333333	-0.692308	-0.512821	-0.588235	-0.789474	-0.688854	-0.666667	-0.234043	-0.450355		Actual mean	-0.4013	-0.4033	-0.278
-0.609756	-0.527778	-0.568767	-0.212121	-0.684211	-0.448166	-0.457143	-0.153846	-0.305495		t. df	t=10.73. df=14	t=12.01. df=14	t=7.445. df=14
-0.558824	-0.515152	-0.536988	0.0333333	-0.4375	-0.202083	-0.0243902	0.0909091	0.0332594		P value (two tailed)	<0.0001	<0.0001	<0.0001
-0.310345	-0.0731707	-0.191758	-0.394737	-0.512821	-0.453779	-0.589744	-0.216216	-0.40298		P value summary	****	****	****
-0.314286	-0.133333	-0.22381	-0.657895	-0.309524	-0.483709	-0.444444	-0.333333	-0.388889		Significant (alpha=0.05)?	Yes	Yes	Yes
-0.322581	0.0322581	-0.145161	-0.264706	-0.441176	-0.352941	-0.411765	-0.03125	-0.221507
										Ordinary one-way ANOVA
										F	3.943
										P value	0.027
										P value summary	*
										Significant diff. among means (P < 0.05)?	Yes
										R squared	0.1581
										Tukey's multiple comparisons test	Mean Diff.	95.00% CI of diff.	Significant?	Summary	Adjusted P Value
										A vs B	0.002	-0.1222 to 0.1262	No	ns	0.9992
										A vs C	-0.1233	-0.2476 to 0.0008904	No	ns	0.052
										B vs C	-0.1253	-0.2496 to -0.001110	Yes	*	0.0476
Figure 4L
w1118 > UAS-hid.rpr			MB054B > w1118			MB054B > UAS-hid.rpr				Statistical Analysis	(A) w1118 > UAS-hid.rpr	(B) MB054B > w1118	(C) MB054B > UAS-hid.rpr
Pref1	Pref 2	PI	Pref1	Pref 2	PI	Pref1	Pref 2	PI
0.37931	0.633333	0.506322	0.310345	0.580645	0.445495	0.423077	0.8	0.611538
0.344828	0.214286	0.279557	0.466667	0.666667	0.566667	0.448276	0.78125	0.614763		Number of values	15	15	15
-0.0322581	0.633333	0.300538	0.0666667	0.538462	0.302564	0.2	0.62069	0.410345		Test for normal distribution: Shapiro-Wilk test
0.269231	0.75	0.509615	0.290323	0.516129	0.403226	-0.147059	0.548387	0.200664		W	0.952	0.9696	0.9189
0.0740741	0.344828	0.209451	0.0645161	0.636364	0.35044	-0.0882353	0.818182	0.364973		P value	0.5572	0.8515	0.1853
-0.1	0.333333	0.116667	-0.125	0.633333	0.254167	0.137931	0.645161	0.391546		Passed normality test (alpha=0.05)?	Yes	Yes	Yes
0.366667	0.724138	0.545402	0.151515	0.625	0.388258	0.34375	0.363636	0.353693		P value summary	ns	ns	ns
-0.16	0.291667	0.0658333	0.342857	0.774194	0.558525	0.277778	0.405405	0.341592		One sample t test
0.222222	0.5625	0.392361	0.515152	0.787879	0.651515	0.387097	0.823529	0.605313		Theoretical mean	0	0	0
0.305556	0.882353	0.593954	0.230769	0.714286	0.472527	0.419355	0.586207	0.502781		Actual mean	0.3913	0.4507	0.3847
0.30303	0.75	0.526515	0.388889	0.30303	0.34596	0.0322581	0.419355	0.225806		t. df	t=7.719. df=14	t=14.67. df=14	t=9.895. df=14
0.53125	0.647059	0.589154	0.617647	0.419355	0.518501	0.225806	0.588235	0.407021		P value (two tailed)	<0.0001	<0.0001	<0.0001
0.655172	0.787879	0.721526	0.65625	0.241379	0.448815	0.1875	0.125	0.15625		P value summary	****	****	****
0.030303	0.333333	0.181818	0.206897	0.612903	0.4099	0.6	0.208333	0.404167		Significant (alpha=0.05)?	Yes	Yes	Yes
0.352941	0.294118	0.323529	0.666667	0.617647	0.642157	0.037037	0.333333	0.185185
										Ordinary one-way ANOVA
										F	0.7882
										P value	0.4613
										P value summary	ns
										Significant diff. among means (P < 0.05)?	No
										R squared	0.03617
										Tukey's multiple comparisons test	Mean Diff.	95.00% CI of diff.	Significant?	Summary	Adjusted P Value
										A vs B	-0.05933	-0.1999 to 0.08128	No	ns	0.5654
										A vs C	0.006667	-0.1339 to 0.1473	No	ns	0.9927
										B vs C	0.066	-0.07462 to 0.2066	No	ns	0.4951
