# Supplementary material for: Four individually identified paired dopamine neurons signal taste punishment in larval Drosophila
Source: eLife. 2025 Jun 16;12:RP91387. doi: 10.7554/eLife.91387 (PMC12169853; doi:10.7554/eLife.91387)
Supplement: Figure 5—source data 1. [file elife-91387-fig5-data1.xlsx]

## Sheet: Figure 5
Figure 5A
w1118 > UAS-ChR2XXL (w/ BL)			SS02160 > UAS-ChRXXL (w/o BL)			SS02160 > UAS-ChRXXL (w/ BL)				Statistical Analysis	(A) w1118 > UAS-ChR2XXL (w/ BL)	(B) SS02160 > UAS-ChRXXL (w/o BL)	(C) SS02160 > UAS-ChRXXL (w/ BL)
Pref1	Pref 2	PI	Pref1	Pref 2	PI	Pref1	Pref 2	PI
-0.3	0.0666667	-0.116667	0.166667	-0.0333333	0.0666667	-0.3	-0.133333	-0.216667
-0.633333	-0.166667	-0.4	-0.4	0.0666667	-0.166667	-0.2	-0.133333	-0.166667		Number of values	15	15	15
-0.133333	0.133333	0	0.0333333	0.1	0.0666667	-0.0666667	0.533333	0.233333		Test for normal distribution: Shapiro-Wilk test
-0.2	-0.433333	-0.316667	0.0333333	0.366667	0.2	-0.633333	-0.333333	-0.483333		W	0.9417	0.8806	0.9673
-0.4	0.1	-0.15	-0.166667	-0.233333	-0.2	-0.4	-0.2	-0.3		P value	0.4048	0.0485	0.8166
0.233333	0.133333	0.183333	-0.1	0	-0.05	-0.3	-0.166667	-0.233333		Passed normality test (alpha=0.05)?	Yes	No	Yes
0.3	0.3	0.3	-0.166667	0.433333	0.133333	-0.633333	-0.566667	-0.6		P value summary	ns	*	ns
0.0666667	-0.2	-0.0666667	0.0666667	0.133333	0.1	-0.433333	-0.266667	-0.35		Wilcoxon Signed Rank Test
-0.166667	0.133333	-0.0166667	-0.3	0.133333	-0.0833333	-0.533333	-0.4	-0.466667		Theoretical median	0	0	0
-0.233333	0.0666667	-0.0833333	-0.4	0.0333333	-0.183333	-0.0666667	0.1	0.0166667		Actual median	-0.05	0.07	-0.23
-0.133333	0.0333333	-0.05	0.266667	0	0.133333	-0.366667	-0.633333	-0.5		Sum of signed ranks (W)	-39	9	-99
-0.333333	-0.2	-0.266667	-0.133333	0.266667	0.0666667	-0.0666667	-0.233333	-0.15		Sum of positive ranks	33	64.5	10.5
-0.433333	0.4	-0.0166667	0.2	0.166667	0.183333	0.1	-0.0666667	0.0166667		Sum of negative ranks	-72	-55.5	-109.5
-0.6	0.533333	-0.0333333	-0.166667	-0.2	-0.183333	0.233333	-0.6	-0.183333		P value (two tailed)	0.2349	0.8155	0.0029
0.266667	0.4	0.333333	-0.0333333	0.166667	0.0666667	-0.466667	-0.1	-0.283333		Exact or estimate?	Exact	Exact	Exact
										P value summary	ns	ns	**
										Significant (alpha=0.05)?	No	No	Yes
										Kruskal-Wallis test
										P value	0.0046
										Exact or approximate P value?	Approximate
										P value summary	**
										Do the medians vary signif. (P < 0.05)?	Yes
										Number of groups	3
										Kruskal-Wallis statistic	10.78
										Dunn's multiple comparisons test	Mean rank diff.	Significant?	Summary	Adjusted P Value
										A vs B	-4.333	No	ns	>0.9999
										A vs C	10.93	No	ns	0.0676
										B vs C	15.27	Yes	**	0.0043
Figure 5B
w1118 > UAS-ChR2XXL (w/ BL)			MB328B > UAS-ChRXXL (w/o BL)			MB328B > UAS-ChRXXL (w/ BL)				Statistical Analysis	(A) w1118 > UAS-ChR2XXL (w/ BL)	(B) MB328B > UAS-ChRXXL (w/o BL)	(C) MB328B > UAS-ChRXXL (w/ BL)
Pref1	Pref 2	PI	Pref1	Pref 2	PI	Pref1	Pref 2	PI
0	0.266667	0.133333	0.2	0.233333	0.216667	-0.3	-0.0333333	-0.166667
-0.1	-0.2	-0.15	0.2	0.133333	0.166667	-0.0333333	-0.366667	-0.2		Number of values	15	15	15
-0.233333	0.6	0.183333	-0.4	0.2	-0.1	-0.333333	0.3	-0.0166667		Test for normal distribution: Shapiro-Wilk test
0.433333	0.133333	0.283333	0.2	0.366667	0.283333	-0.266667	0.133333	-0.0666667		W	0.9508	0.9397	0.9497
0.166667	0.166667	0.166667	-0.533333	0.4	-0.0666667	-0.333333	-0.1	-0.216667		P value	0.5376	0.3783	0.5204
-0.4	0.0333333	-0.183333	-0.166667	-0.233333	-0.2	-0.166667	0.433333	0.133333		Passed normality test (alpha=0.05)?	Yes	Yes	Yes
0.233333	-0.0666667	0.0833333	0.2	0.366667	0.283333	-0.333333	0.3	-0.0166667		P value summary	ns	ns	ns
-0.3	-0.0333333	-0.166667	0.0666667	0.4	0.233333	-0.366667	0.333333	-0.0166667		One sample t test
-0.3	0.733333	0.216667	-0.466667	0.2	-0.133333	-0.3	0.433333	0.0666667		Theoretical mean	0	0	0
-0.133333	0.233333	0.05	-0.266667	0.6	0.166667	0.1	0.1	0.1		Actual mean	0.03067	0.04867	-0.05067
-0.366667	0.333333	-0.0166667	-0.2	0.333333	0.0666667	-0.433333	-0.0333333	-0.233333		t, df	t=0.6943, df=14	t=1.096, df=14	t=1.689, df=14
-0.3	0.366667	0.0333333	-0.3	-0.166667	-0.233333	-0.466667	0.266667	-0.1		P value (two tailed)	0.4989	0.2914	0.1133
0.366667	0.0333333	0.2	-0.266667	0.3	0.0166667	-0.333333	0.366667	0.0166667		P value summary	ns	ns	ns
-0.533333	-0.0333333	-0.283333	-0.133333	0.233333	0.05	-0.5	0.333333	-0.0833333		Significant (alpha=0.05)?	No	No	No
0	-0.166667	-0.0833333	-0.4	0.333333	-0.0333333	-0.133333	0.233333	0.05
										Ordinary one-way ANOVA
										F	1.743
										P value	0.1874
										P value summary	ns
										Significant diff. among means (P < 0.05)?	No
										R squared	0.07664
										Tukey's multiple comparisons test	Mean Diff.	95.00% CI of diff.	Below threshold?	Summary	Adjusted P Value
										A vs B	-0.018	-0.1557 to 0.1197	No	ns	0.946
										A vs C	0.08133	-0.05640 to 0.2191	No	ns	0.3326
										B vs C	0.09933	-0.03840 to 0.2371	No	ns	0.1982
Figure 5C
w1118 > UAS-ChR2XXL (w/ BL)			SS02180 > UAS-ChRXXL (w/o BL)			SS02180 > UAS-ChRXXL (w/ BL)				Statistical Analysis	(A) w1118 > UAS-ChR2XXL (w/ BL)	(B) SS02180 > UAS-ChRXXL (w/o BL)	(C) SS02180 > UAS-ChRXXL (w/ BL)
Pref1	Pref 2	PI	Pref1	Pref 2	PI	Pref1	Pref 2	PI
0	0.266667	0.133333	-0.166667	0.433333	0.133333	-0.6	-0.466667	-0.533333
-0.1	-0.2	-0.15	-0.3	0.4	0.05	-0.533333	-0.233333	-0.383333		Number of values	15	15	15
-0.233333	0.6	0.183333	-0.466667	0.7	0.116667	-0.433333	-0.166667	-0.3		Test for normal distribution: Shapiro-Wilk test
0.433333	0.133333	0.283333	-0.1	0.366667	0.133333	-0.366667	-0.5	-0.433333		W	0.9508	0.9555	0.8879
0.166667	0.166667	0.166667	-0.166667	-0.233333	-0.2	-0.333333	-0.466667	-0.4		P value	0.5376	0.6151	0.0624
-0.4	0.0333333	-0.183333	-0.333333	0.0666667	-0.133333	-0.533333	-0.2	-0.366667		Passed normality test (alpha=0.05)?	Yes	Yes	Yes
0.233333	-0.0666667	0.0833333	-0.266667	0.1	-0.0833333	-0.4	-0.433333	-0.416667		P value summary	ns	ns	ns
-0.3	-0.0333333	-0.166667	-0.366667	0.366667	0	-0.666667	-0.533333	-0.6		One sample t test
-0.3	0.733333	0.216667	-0.7	0.366667	-0.166667	-0.333333	-0.6	-0.466667		Theoretical mean	0	0	0
-0.133333	0.233333	0.05	-0.666667	0.2	-0.233333	-0.7	-0.266667	-0.483333		Actual mean	0.03067	-0.01533	-0.3913
-0.366667	0.333333	-0.0166667	-0.466667	0.433333	-0.0166667	-0.5	-0.366667	-0.433333		t, df	t=0.6943, df=14	t=0.4615, df=14	t=11.29, df=14
-0.3	0.366667	0.0333333	-0.4	0.766667	0.183333	-0.4	0.0333333	-0.183333		P value (two tailed)	0.4989	0.6515	<0.0001
0.366667	0.0333333	0.2	-0.3	0.366667	0.0333333	-0.2	0.1	-0.05		P value summary	ns	ns	****
-0.533333	-0.0333333	-0.283333	-0.366667	0.233333	-0.0666667	-0.566667	-0.3	-0.433333		Significant (alpha=0.05)?	No	No	Yes
0	-0.166667	-0.0833333	-0.266667	0.333333	0.0333333	-0.3	-0.5	-0.4
										Ordinary one-way ANOVA
										F	37.78
										P value	<0.0001
										P value summary	****
										Significant diff. among means (P < 0.05)?	Yes
										R squared	0.6427
										Tukey's multiple comparisons test	Mean Diff.	95.00% CI of diff.	Below threshold?	Summary	Adjusted P Value
										A vs B	0.046	-0.08342 to 0.1754	No	ns	0.666
										A vs C	0.422	0.2926 to 0.5514	Yes	****	<0.0001
										B vs C	0.376	0.2466 to 0.5054	Yes	****	<0.0001
Figure 5D
w1118 > UAS-ChR2XXL (w/ BL)			SS01716 > UAS-ChRXXL (w/o BL)			SS01716 > UAS-ChRXXL (w/ BL)				Statistical Analysis	(A) w1118 > UAS-ChR2XXL (w/ BL)	(B) SS01716 > UAS-ChRXXL (w/o BL)	(C) SS01716 > UAS-ChRXXL (w/ BL)
Pref1	Pref 2	PI	Pref1	Pref 2	PI	Pref1	Pref 2	PI
0	0.266667	0.133333	-0.433333	0.3	-0.0666667	-0.3	-0.3	-0.3
-0.1	-0.2	-0.15	-0.333333	0.4	0.0333333	-0.566667	-0.233333	-0.4		Number of values	15	15	15
-0.233333	0.6	0.183333	-0.366667	-0.4	-0.383333	-0.366667	0.1	-0.133333		Test for normal distribution: Shapiro-Wilk test
0.433333	0.133333	0.283333	0.266667	-0.166667	0.05	0.3	-0.366667	-0.0333333		W	0.9508	0.9775	0.9651
0.166667	0.166667	0.166667	0.333333	0.3	0.316667	-0.0333333	-0.0666667	-0.05		P value	0.5376	0.9498	0.7794
-0.4	0.0333333	-0.183333	-0.133333	0.233333	0.05	-0.233333	0.133333	-0.05		Passed normality test (alpha=0.05)?	Yes	Yes	Yes
0.233333	-0.0666667	0.0833333	-0.1	0.266667	0.0833333	-0.6	-0.633333	-0.616667		P value summary	ns	ns	ns
-0.3	-0.0333333	-0.166667	0.3	0.166667	0.233333	-0.5	-0.366667	-0.433333		One sample t test
-0.3	0.733333	0.216667	-0.233333	-0.0333333	-0.133333	-0.1	-0.3	-0.2		Theoretical mean	0	0	0
-0.133333	0.233333	0.05	-0.0333333	-0.366667	-0.2	0.0333333	-0.0666667	-0.0166667		Actual mean	0.03067	0.01133	-0.192
-0.366667	0.333333	-0.0166667	0.1	0.466667	0.283333	-0.2	-0.166667	-0.183333		t, df	t=0.6943, df=14	t=0.2358, df=14	t=3.661, df=14
-0.3	0.366667	0.0333333	0.366667	-0.133333	0.116667	-0.266667	-0.5	-0.383333		P value (two tailed)	0.4989	0.817	0.0026
0.366667	0.0333333	0.2	-0.2	0.133333	-0.0333333	-0.1	-0.1	-0.1		P value summary	ns	ns	**
-0.533333	-0.0333333	-0.283333	-0.0666667	-0.2	-0.133333	0.133333	0.233333	0.183333		Significant (alpha=0.05)?	No	No	Yes
0	-0.166667	-0.0833333	0	-0.1	-0.05	-0.2	-0.133333	-0.166667
										Ordinary one-way ANOVA
										F	6.511
										P value	0.0034
										P value summary	**
										Significant diff. among means (P < 0.05)?	Yes
										R squared	0.2367
										Tukey's multiple comparisons test	Mean Diff.	95.00% CI of diff.	Below threshold?	Summary	Adjusted P Value
										A vs B	0.01933	-0.1468 to 0.1854	No	ns	0.9569
										A vs C	0.2227	0.05657 to 0.3888	Yes	**	0.0062
										B vs C	0.2033	0.03724 to 0.3694	Yes	*	0.0132
Figure 5E
w1118 > UAS-ChR2XXL (w/ BL)			MB054B > UAS-ChRXXL (w/o BL)			MB054B > UAS-ChRXXL (w/ BL)				Statistical Analysis	(A) w1118 > UAS-ChR2XXL (w/ BL)	(B) MB054B > UAS-ChRXXL (w/o BL)	(C) MB054B > UAS-ChRXXL (w/ BL)
Pref1	Pref 2	PI	Pref1	Pref 2	PI	Pref1	Pref 2	PI
0	0.266667	0.133333	-0.5	0.0666667	-0.216667	-0.1875	-0.533333	-0.360417
-0.1	-0.2	-0.15	0.266667	-0.566667	-0.15	-0.466667	-0.466667	-0.466667		Number of values	15	15	15
-0.233333	0.6	0.183333	-0.533333	0.1	-0.216667	0.266667	-0.0666667	0.1		Test for normal distribution: Shapiro-Wilk test
0.433333	0.133333	0.283333	0.166667	0.0666667	0.116667	-0.466667	-0.633333	-0.55		W	0.9508	0.9357	0.8995
0.166667	0.166667	0.166667	0.5	-0.333333	0.0833333	-0.5	-0.5	-0.5		P value	0.5376	0.3317	0.0934
-0.4	0.0333333	-0.183333	-0.166667	-0.166667	-0.166667	0.0333333	-0.533333	-0.25		Passed normality test (alpha=0.05)?	Yes	Yes	Yes
0.233333	-0.0666667	0.0833333	-0.266667	-0.266667	-0.266667	-0.8	-0.466667	-0.633333		P value summary	ns	ns	ns
-0.3	-0.0333333	-0.166667	0.233333	0.0333333	0.133333	-0.533333	-0.466667	-0.5		One sample t test
-0.3	0.733333	0.216667	-0.1	-0.266667	-0.183333	-0.466667	-0.433333	-0.45		Theoretical mean	0	0	0
-0.133333	0.233333	0.05	0.2	-0.166667	0.0166667	-0.4	-0.4	-0.4		Actual mean	0.03067	-0.05267	-0.3893
-0.366667	0.333333	-0.0166667	-0.133333	0.2	0.0333333	-0.5	-0.633333	-0.566667		t, df	t=0.6943, df=14	t=1.136, df=14	t=8.423, df=14
-0.3	0.366667	0.0333333	0.3	-0.0666667	0.116667	0.1	-0.666667	-0.283333		P value (two tailed)	0.4989	0.2752	<0.0001
0.366667	0.0333333	0.2	0.3	0.3	0.3	-0.233333	-0.5	-0.366667		P value summary	ns	ns	****
-0.533333	-0.0333333	-0.283333	-0.366667	-0.233333	-0.3	0	-0.466667	-0.233333		Significant (alpha=0.05)?	No	No	Yes
0	-0.166667	-0.0833333	-0.233333	0.0666667	-0.0833333	-0.2	-0.566667	-0.383333
										Ordinary one-way ANOVA
										F	23.78
										P value	<0.0001
										P value summary	****
										Significant diff. among means (P < 0.05)?	Yes
										R squared	0.531
										Tukey's multiple comparisons test	Mean Diff.	95.00% CI of diff.	Below threshold?	Summary	Adjusted P Value
										A vs B	0.08333	-0.07335 to 0.2400	No	ns	0.4074
										A vs C	0.42	0.2633 to 0.5767	Yes	****	<0.0001
										B vs C	0.3367	0.1800 to 0.4933	Yes	****	<0.0001
Figure 5F
w1118 > UAS-ChR2XXL (w/ BL)			MB054B > UAS-ChRXXL (w/o BL)			MB054B > UAS-ChRXXL (w/ BL)				Statistical Analysis	(A) w1118 > UAS-ChR2XXL (w/ BL)	(B) MB054B > UAS-ChRXXL (w/o BL)	(C) MB054B > UAS-ChRXXL (w/ BL)
Pref1	Pref 2	PI	Pref1	Pref 2	PI	Pref1	Pref 2	PI
-0.0666667	0.4	0.166667	0.3	-0.5	-0.1	-0.428571	-0.233333	-0.330952
-0.0333333	-0.133333	-0.0833333	-0.0666667	-0.266667	-0.166667	-0.366667	-0.533333	-0.45		Number of values	15	15	15
-0.1	-0.666667	-0.383333	0.3	0.333333	0.316667	0.133333	-0.466667	-0.166667		Test for normal distribution: Shapiro-Wilk test
-0.3	-0.366667	-0.333333	0.333333	-0.0666667	0.133333	-0.366667	-0.566667	-0.466667		W	0.9532	0.9736	0.9679
-0.3	-0.3	-0.3	0.266667	0.1	0.183333	-0.6	-0.566667	-0.583333		P value	0.576	0.9073	0.8254
0.133333	-0.0666667	0.0333333	-0.166667	0.133333	-0.0166667	-0.233333	-0.366667	-0.3		Passed normality test (alpha=0.05)?	Yes	Yes	Yes
0.4	0.366667	0.383333	-0.0333333	-0.6	-0.316667	-0.566667	-0.4	-0.483333		P value summary	ns	ns	ns
-0.1	-0.2	-0.15	0.0333333	-0.366667	-0.166667	-0.7	-0.333333	-0.516667		One sample t test
-0.466667	0.133333	-0.166667	0	0.133333	0.0666667	-0.466667	-0.6	-0.533333		Theoretical mean	0	0	0
-0.233333	0.133333	-0.05	-0.2	0.7	0.25	-0.633333	-0.7	-0.666667		Actual mean	-0.09733	-0.01267	-0.43
-0.333333	-0.366667	-0.35	-0.433333	0.0666667	-0.183333	-0.666667	-0.545455	-0.606061		t, df	t=1.797, df=14	t=0.2764, df=14	t=11.28, df=14
-0.466667	0.0333333	-0.216667	0.133333	-0.133333	0	0.0666667	-0.5	-0.216667		P value (two tailed)	0.0939	0.7862	<0.0001
-0.166667	0.266667	0.05	-0.333333	0.1	-0.116667	-0.433333	-0.1	-0.266667		P value summary	ns	ns	****
0	0.0333333	0.0166667	0.0666667	-0.233333	-0.0833333	-0.366667	-0.6	-0.483333		Significant (alpha=0.05)?	No	No	Yes
0.266667	-0.433333	-0.0833333	0	0.0333333	0.0166667	-0.466667	-0.266667	-0.366667
										Ordinary one-way ANOVA
										F	22.51
										P value	<0.0001
										P value summary	****
										Significant diff. among means (P < 0.05)?	Yes
										R squared	0.5173
										Tukey's multiple comparisons test	Mean Diff.	95.00% CI of diff.	Below threshold?	Summary	Adjusted P Value
										A vs B	-0.08467	-0.2444 to 0.07510	No	ns	0.41
										A vs C	0.3327	0.1729 to 0.4924	Yes	****	<0.0001
										B vs C	0.4173	0.2576 to 0.5771	Yes	****	<0.0001
