# Supplementary material for: Four individually identified paired dopamine neurons signal taste punishment in larval Drosophila
Source: eLife. 2025 Jun 16;12:RP91387. doi: 10.7554/eLife.91387 (PMC12169853; doi:10.7554/eLife.91387)
Supplement: Figure 6—source data 1. [file elife-91387-fig6-data1.xlsx]

## Sheet: Figure 6
Figure 6A
SS02160 >UAS-GtACR2 w/o ATR			SS02160 >UAS-GtACR2 w/ ATR				Statistical Analysis	(A) SS02160 > UAS-GtACR2 w/o ATR	(B) SS02160 > UAS-GtACR2 w/ ATR
Pref1	Pref 2	PI	Pref1	Pref 2	PI
-0.34375	0	-0.171875	-0.322581	-0.342857	-0.332719
-0.885714	-0.375	-0.630357	-0.594595	-0.411765	-0.50318		Number of values	15	15
-0.193548	0	-0.0967742	-0.181818	-0.282051	-0.231935		Test for normal distribution: Shapiro-Wilk test
-0.7	-0.103448	-0.401724	-0.0810811	-0.157895	-0.119488		W	0.9465	0.9343
-0.285714	-0.222222	-0.253968	-0.617647	-0.275862	-0.446755		P value	0.4715	0.3155
-0.129032	-0.793103	-0.461068	-0.5625	-0.194444	-0.378472		Passed normality test (alpha=0.05)?	Yes	Yes
-0.483871	-0.294118	-0.388994	-0.0967742	-0.228571	-0.162673		P value summary	ns	ns
-0.555556	-0.352941	-0.454248	-0.135135	-0.228571	-0.181853		One sample t test
-0.638889	-0.631579	-0.635234	-0.111111	-0.264706	-0.187908		Theoretical mean	0	0
-0.441176	-0.5	-0.470588	-0.666667	-0.368421	-0.517544		Actual mean	-0.4167	-0.308
-0.37931	-0.2	-0.289655	-0.545455	0	-0.272727		t, df	t=10.18, df=14	t=8.302, df=14
-0.441176	-0.558824	-0.5	-0.322581	-0.371429	-0.347005		P value (two tailed)	<0.0001	<0.0001
-0.5	-0.451613	-0.475806	-0.027027	-0.181818	-0.104423		P value summary	****	****
-0.71875	-0.483871	-0.60131	-0.605263	-0.0555556	-0.330409		Significant (alpha=0.05)?	Yes	Yes
-0.575758	-0.258065	-0.416911	-0.485714	-0.53125	-0.508482
							Unpaired t-test
							P value	0.0591
							P value summary	ns
							Significantly different (P < 0.05)?	No
							One- or two-tailed P value?	Two-tailed
							t, df	t=1.967, df=28
							Mean of column A	-0.4167
							Mean of column B	-0.308
							Difference between means (B - A) ± SEM	0.1087 ± 0.05524
							95% confidence interval	-0.004484 to 0.2218
							R squared (eta squared)	0.1214
Figure 6B
MB328B > UAS-GtACR2 w/o ATR			MB328B >UAS-GtACR2 w/ ATR				Statistical Analysis	(A) MB328B > UAS-GtACR2 w/o ATR	(B) MB328B > UAS-GtACR2 w/ ATR
Pref1	Pref 2	PI	Pref1	Pref 2	PI
-0.333333	0.0857143	-0.12381	-0.179487	-0.333333	-0.25641
-0.5	-0.444444	-0.472222	-0.771429	-0.525	-0.648214		Number of values	15	15
-0.5	-0.542857	-0.521429	0.0294118	-0.424242	-0.197415		Test for normal distribution: Shapiro-Wilk test
-0.518519	-0.413793	-0.466156	0	-0.351351	-0.175676		W	1.099	1.545
-0.16129	-0.354839	-0.258065	-0.0769231	-0.305556	-0.191239		P value	0.5772	0.4619
-0.542857	-0.419355	-0.481106	-0.264706	-0.394737	-0.329721		Passed normality test (alpha=0.05)?	Yes	Yes
-0.382353	-0.371429	-0.376891	-0.371429	-0.205882	-0.288655		P value summary	ns	ns
-0.25	-0.257143	-0.253571	-0.548387	-0.375	-0.461694		One sample t test
-0.3125	-0.15625	-0.234375	-0.1	-0.114286	-0.107143		Theoretical mean	0	0
-0.21875	-0.484848	-0.351799	-0.516129	-0.371429	-0.443779		Actual mean	-0.386	-0.3187
-0.361111	-0.59375	-0.477431	-0.387097	-0.454545	-0.420821		t, df	t=11.24, df=14	t=8.420, df=14
-0.486486	-0.666667	-0.576577	-0.129032	-0.285714	-0.207373		P value (two tailed)	<0.0001	<0.0001
-0.192308	-0.375	-0.283654	-0.0294118	-0.363636	-0.196524		P value summary	****	****
-0.727273	-0.3125	-0.519886	-0.305556	-0.588235	-0.446895		Significant (alpha=0.05)?	Yes	Yes
-0.647059	-0.151515	-0.399287	-0.297297	-0.486486	-0.391892
							Unpaired t-test
							P value	0.1983
							P value summary	ns
							Significantly different (P < 0.05)?	No
							One- or two-tailed P value?	Two-tailed
							t, df	t=1.318, df=28
							Mean of column A	-0.386
							Mean of column B	-0.3187
							Difference between means (B - A) ± SEM	0.06733 ± 0.05110
							95% confidence interval	-0.03734 to 0.1720
							R squared (eta squared)	0.05839
Figure 6C
SS02180 > UAS-GtACR2 w/o ATR			SS02180 >UAS-GtACR2 w/ ATR				Statistical Analysis	(A) SS02180 > UAS-GtACR2 w/o ATR	(B) SS02180 > UAS-GtACR2 w/ ATR
Pref1	Pref 2	PI	Pref1	Pref 2	PI
-0.294118	-0.4375	-0.365809	-0.121212	-0.342105	-0.231659
-0.324324	-0.628571	-0.476448	-0.138889	-0.314286	-0.226587		Number of values	15	15
-0.542857	-0.0909091	-0.316883	-0.0555556	-0.421053	-0.238304		Test for normal distribution: Shapiro-Wilk test
-0.212121	-0.6	-0.406061	-0.193548	0.0645161	-0.0645161		W	0.9622	0.9614
-0.419355	-0.258065	-0.33871	-0.466667	-0.432432	-0.44955		P value	0.7305	0.7163
-0.371429	-0.842105	-0.606767	-0.242424	-0.636364	-0.439394		Passed normality test (alpha=0.05)?	Yes	Yes
-0.28125	-0.157895	-0.219572	-0.176471	-0.333333	-0.254902		P value summary	ns	ns
-0.548387	-0.487179	-0.517783	-0.484848	-0.131579	-0.308214		One sample t test
-0.393939	-0.589744	-0.491841	-0.234043	-0.666667	-0.450355		Theoretical mean	0	0
-0.354839	-0.290323	-0.322581	-0.522727	-0.513514	-0.51812		Actual mean	-0.432	-0.354
-0.628571	-0.333333	-0.480952	-0.428571	-0.678571	-0.553571		t, df	t=13.65, df=14	t=8.448, df=14
-0.5	-0.333333	-0.416667	-0.333333	-0.40625	-0.369792		P value (two tailed)	<0.0001	<0.0001
-0.764706	-0.655172	-0.709939	-0.157895	-0.451613	-0.304754		P value summary	****	****
-0.46875	-0.324324	-0.396537	-0.368421	-0.0789474	-0.223684		Significant (alpha=0.05)?	Yes	Yes
-0.404762	-0.378378	-0.39157	-0.735294	-0.647059	-0.691176
							Unpaired t-test
							P value	0.1487
							P value summary	ns
							Significantly different (P < 0.05)?	No
							One- or two-tailed P value?	Two-tailed
							t, df	t=1.485, df=28
							Mean of column A	-0.432
							Mean of column B	-0.354
							Difference between means (B - A) ± SEM	0.07800 ± 0.05252
							95% confidence interval	-0.02958 to 0.1856
							R squared (eta squared)	0.07303
Figure 6D
SS01716 > UAS-GtACR2 w/o ATR			SS01716 >UAS-GtACR2 w/ ATR				Statistical Analysis	(A) SS01716 > UAS-GtACR2 w/o ATR	(B) SS01716 > UAS-GtACR2 w/ ATR
Pref1	Pref 2	PI	Pref1	Pref 2	PI
0.171429	-0.4	-0.114286	-0.0285714	-0.380952	-0.204762
-0.424242	-0.272727	-0.348485	0.0909091	-0.232558	-0.0708245		Number of values	15	15
-0.307692	-0.466667	-0.387179	-0.375	-0.527778	-0.451389		Test for normal distribution: Shapiro-Wilk test
-0.424242	-0.294118	-0.35918	-0.0454545	-0.485714	-0.265584		W	0.92	0.9663
-0.513514	-0.282051	-0.397782	-0.147059	-0.5	-0.323529		P value	0.1928	0.8006
-0.433333	-0.485714	-0.459524	-0.34375	-0.0857143	-0.214732		Passed normality test (alpha=0.05)?	Yes	Yes
-0.514286	-0.702703	-0.608494	-0.394737	-0.611111	-0.502924		P value summary	ns	ns
-0.432432	-0.410256	-0.421344	-0.125	-0.45	-0.2875		One sample t test
-0.5	-0.324324	-0.412162	-0.3	-0.333333	-0.316667		Theoretical mean	0	0
-0.535714	-0.607143	-0.571429	-0.314286	-0.210526	-0.262406		Actual mean	-0.412	-0.3113
-0.294118	-0.484848	-0.389483	-0.3125	-0.342857	-0.327679		t, df	t=12.73, df=14	t=11.43, df=14
-0.361111	-0.567568	-0.464339	-0.142857	-0.513514	-0.328185		P value (two tailed)	<0.0001	<0.0001
-0.405405	-0.766667	-0.586036	-0.342105	-0.432432	-0.387269		P value summary	****	****
-0.114286	-0.675676	-0.394981	-0.294118	-0.5	-0.397059		Significant (alpha=0.05)?	Yes	Yes
-0.0882353	-0.457143	-0.272689	-0.351351	-0.309524	-0.330438
							Unpaired t-test
							P value	0.0244
							P value summary	*
							Significantly different (P < 0.05)?	Yes
							One- or two-tailed P value?	Two-tailed
							t, df	t=2.380, df=28
							Mean of column A	-0.412
							Mean of column B	-0.3113
							Difference between means (B - A) ± SEM	0.1007 ± 0.04230
							95% confidence interval	0.01401 to 0.1873
							R squared (eta squared)	0.1682
Figure 6E
MB054B > UAS-GtACR2 w/o ATR			MB054B >UAS-GtACR2 w/ ATR				Statistical Analysis	(A) MB054B > UAS-GtACR2 w/o ATR	(B) MB054B > UAS-GtACR2 w/ ATR
Pref1	Pref 2	PI	Pref1	Pref 2	PI
-0.28125	-0.393939	-0.337595	-0.142857	-0.344828	-0.243842
-0.464286	-0.419355	-0.44182	0.030303	-0.242424	-0.106061		Number of values	15	15
-0.25	-0.030303	-0.140152	-0.133333	-0.142857	-0.138095		Test for normal distribution: Shapiro-Wilk test
-0.631579	-0.24	-0.435789	-0.34375	-0.266667	-0.305208		W	0.9521	0.9861
-0.741935	-0.482759	-0.612347	-0.352941	0.103448	-0.124746		P value	0.5581	0.9953
-0.517241	-0.384615	-0.450928	-0.266667	-0.538462	-0.402564		Passed normality test (alpha=0.05)?	Yes	Yes
-0.5	-0.3	-0.4	-0.413793	-0.5	-0.456897		P value summary	ns	ns
-0.3	-0.0357143	-0.167857	-0.0909091	-0.233333	-0.162121		One sample t test
-0.241379	-0.533333	-0.387356	-0.178571	-0.366667	-0.272619		Theoretical mean	0	0
-0.361111	-0.34375	-0.352431	0.214286	-0.352941	-0.0693277		Actual mean	-0.3913	-0.22
-0.69697	-0.0833333	-0.390152	-0.212766	0.25	0.018617		t, df	t=11.64, df=14	t=6.489, df=14
-0.529412	-0.571429	-0.55042	-0.30303	-0.448276	-0.375653		P value (two tailed)	<0.0001	<0.0001
-0.34375	-0.178571	-0.261161	-0.3125	-0.0606061	-0.186553		P value summary	****	****
-0.323529	-0.485714	-0.404622	-0.371429	-0.157895	-0.264662		Significant (alpha=0.05)?	Yes	Yes
-0.448276	-0.625	-0.536638	-0.25	-0.175	-0.2125
							Unpaired t-test
							P value	0.0012
							P value summary	**
							Significantly different (P < 0.05)?	Yes
							One- or two-tailed P value?	Two-tailed
							t, df	t=3.589, df=28
							Mean of column A	-0.3913
							Mean of column B	-0.22
							Difference between means (B - A) ± SEM	0.1713 ± 0.04774
							95% confidence interval	0.07355 to 0.2691
							R squared (eta squared)	0.3151
Figure 6F
MB054B > UAS-GtACR2 w/o ATR			MB054B >UAS-GtACR2 w/ ATR				Statistical Analysis	(A) MB054B > UAS-GtACR2 w/o ATR	(B) MB054B > UAS-GtACR2 w/ ATR
Pref1	Pref 2	PI	Pref1	Pref 2	PI
-0.354839	-0.421053	-0.387946	-0.542857	-0.102564	-0.322711
-0.638889	-0.514286	-0.576587	-0.205128	-0.214286	-0.209707		Number of values	15	15
-0.425	-0.380952	-0.402976	-0.0909091	-0.147059	-0.118984		Test for normal distribution: Shapiro-Wilk test
-0.432432	-0.5	-0.466216	-0.366667	-0.157895	-0.262281		W	0.8426	0.984
-0.516129	-0.388889	-0.452509	-0.228571	-0.428571	-0.328571		P value	0.0137	0.9898
-0.764706	-0.534884	-0.649795	-0.325	-0.195122	-0.260061		Passed normality test (alpha=0.05)?	No	Yes
-0.55	-0.205882	-0.377941	-0.317073	-0.142857	-0.229965		P value summary	*	ns
-0.433333	-0.84375	-0.638542	-0.395349	-0.205882	-0.300616		Wilcoxon Signed Rank Test
-0.677419	-0.636364	-0.656891	-0.482759	0.0555556	-0.213602		Theoretical median	0	0
-0.457143	-0.341463	-0.399303	-0.171429	-0.157895	-0.164662		Actual median	-0.45	-0.26
-0.447368	-0.512195	-0.479782	-0.522727	-0.25	-0.386364		Sum of signed ranks (W)	-120	-120
-0.295455	-0.414634	-0.355044	-0.551724	-0.111111	-0.331418		Sum of positive ranks	0	0
-0.72973	-0.606061	-0.667895	0.0263158	-0.470588	-0.222136		Sum of negative ranks	-120	-120
-0.258065	-0.439024	-0.348544	-0.137255	-0.355556	-0.246405		P value (two tailed)	<0.0001	<0.0001
-0.421053	-0.380952	-0.401003	-0.297872	-0.282051	-0.289962		Exact or estimate?	Exact	Exact
							P value summary	****	****
							Significant (alpha=0.05)?	Yes	Yes
							Mann-Whitney test
							P value	<0.0001
							Exact or approximate P value?	Exact
							P value summary	****
							Significantly different (P < 0.05)?	Yes
							One- or two-tailed P value?	Two-tailed
							Sum of ranks in column A,B	123.5 , 341.5
							Mann-Whitney U	3.5
							Median of column A	-0.45
							Median of column B	-0.26
							Difference: Actual	0.19
							Difference: Hodges-Lehmann	0.19
